1  
2  
3  
4  
5  
6  
7  
8  
9  
10  
11  
12  
13  
14  
15  
16  
17  
18  
19  
20  
21  
22  
23  
24  
25  
26  
27  
28  
29  
30  
31  
32  
33  
34  
35

### **Suppression of *Plasmodium* MIF-CD74 Signaling Protects Against Severe Malaria**

Alvaro Baeza Garcia<sup>1\*</sup>, Edwin Siu<sup>1</sup>, Xin Du<sup>1</sup>, Lin Leng<sup>1</sup>, Blandine Franke-Fayard<sup>3</sup>, Chris J Janse<sup>3</sup>, Shanshan W Howland<sup>4</sup>, Laurent Rénia<sup>4</sup>, Elias Lolis<sup>5</sup>, Richard Bucala<sup>1,2\*</sup>

#### **Affiliations:**

<sup>1</sup>Departments of Internal Medicine, <sup>2</sup>Pharmacology, Yale School of Medicine, and <sup>3</sup>Epidemiology of Microbial Diseases, Yale School of Public Health, New Haven, Connecticut 06520, USA. <sup>4</sup>Department of Parasitology, Leiden University Medical Center, Leiden, Netherlands, <sup>5</sup>Singapore Immunology Network, Agency for Science, Technology and Research (A\*STAR), Singapore, Singapore. <sup>5</sup> Department of Pharmacology, School of Medicine, Yale University, New Haven, CT, 06510, USA.

\*Correspondence to Richard Bucala, Department of Internal Medicine, Yale University School of Medicine P.O. Box 208031, 300 Cedar St., New Haven, Connecticut 06520-8031, USA. Telephone at (203) 785-2453. Fax at (203) 785-5415. Email at [richard.bucala@yale.edu](mailto:richard.bucala@yale.edu)

\*Correspondence to Alvaro Baeza Garcia. Email at [alvaro.baeza-garcia@inserm.fr](mailto:alvaro.baeza-garcia@inserm.fr)

36 **Abstract**

37 Malaria begins when mosquito-borne *Plasmodium* sporozoites invade hepatocytes and usurp  
38 host pathways to support the differentiation and multiplication of erythrocyte-infective,  
39 merozoite progeny. All *Plasmodium* species encode an orthologue of the innate cytokine,  
40 Macrophage Migration Inhibitory Factor (MIF), which functions in mammalian biology to  
41 regulate innate responses. Using a genetically-targeted strain of *Plasmodium berghei*, we  
42 demonstrate that the *Plasmodium* MIF orthologue, PMIF, activates the cognate host MIF  
43 receptor, CD74, to inhibit the host-protective apoptosis response of infected hepatocytes and  
44 sustain *Plasmodium* development and replication. Infection of CD74 deficient (*Cd74<sup>-/-</sup>*) mice  
45 revealed a significantly reduced liver burden of *Plasmodium* parasites compared with WT mice  
46 and protection from experimental cerebral malaria (ECM) development. Protection from ECM  
47 additionally was associated with the inability of *Cd74<sup>-/-</sup>* brain microvessel endothelial cells to  
48 present parasite antigen to sequestered, *Plasmodium*-specific CD8<sup>+</sup> T cells. A novel  
49 pharmacologic PMIF-selective antagonist reduced PMIF/CD74 signaling and liver-stage  
50 parasite burden, and fully protected mice from ECM. These findings reveal a conserved  
51 mechanism for *Plasmodium* usurpation of host CD74 signaling and suggest a tractable  
52 approach for new pharmacologic intervention.

53

54

55

56

57

58

59

60

61

62

63

64

65

66

67

68

## 69 Introduction

70 Malaria caused by parasites of the genus *Plasmodium* is the most deadly parasitic  
71 disease, causing approximately half a million deaths annually [1]. *Plasmodium* sporozoites  
72 enter the skin through the bite of infected *Anopheles* mosquitoes and transit through the  
73 bloodstream to invade the liver, where a single infected hepatocyte produces tens of  
74 thousands of erythrocyte-infectious merozoites and initiates the erythrocytic cycle of  
75 infection. During the pre-erythrocytic stage, *Plasmodium*-infected hepatocytes are re-  
76 programmed toward metabolic pathways essential for parasite differentiation and  
77 proliferation and become resistant to apoptosis, which is a host-protective mechanism to  
78 restrict infection. Prior studies of *Plasmodium*-infected cells have implicated pro-survival  
79 roles for hepatocyte growth factor signaling [2, 3] and inhibition of the tumor suppressor  
80 p53, activated by cellular stress to initiate programmed cell death [4]. The subsequent  
81 erythrocytic stage of infection produces the disease's clinical manifestations [5], including  
82 the most severe complication of *P. falciparum* infection: cerebral malaria leading to impaired  
83 consciousness, seizures, coma, and subsequent mortality [6]. The experimental cerebral  
84 malaria (ECM) animal model by infection of susceptible C57BL/6J mice with *Plasmodium*  
85 *berghei* ANKA (*PbA*) reproduces many neurological signs and pathologic changes associated  
86 with human cerebral malaria. ECM is triggered by parasitized erythrocytes in the cerebral  
87 microvasculature leading to the production of inflammatory molecules such as IFN- $\gamma$ ,  
88 granzyme B, and perforin, and is associated with the recruitment and accumulation of effector  
89 CD8+ T cells [7, 8].

90 Both host and parasite factors contribute to the pre- and erythrocytic stages of infection  
91 and severe malaria development. *Plasmodium* parasites express intricate strategies to evade  
92 immune detection and destruction. It is noteworthy that all *Plasmodium* species analyzed  
93 genetically encode an orthologue of the mammalian cytokine macrophage migration inhibitory  
94 factor (MIF) [9, 10]. MIF sustains activation responses by promoting innate cell survival,  
95 which occurs by signaling through its cognate receptor CD74, leading to sustained ERK1/2  
96 activation and reducing cellular p53 activity [11, 12, 13]. *Plasmodium* MIF (PMIF) is highly  
97 conserved in all known *Plasmodium* genomes; for instance, only a single amino acid  
98 distinguishes murine *Plasmodium berghei* from human *P. falciparum* PMIF [9, 10]. Recent  
99 evidence has implicated PMIF in the growth and development of liver-stage parasites [14, 15],  
100 and PMIF binds with high affinity to the host receptor CD74 [16, 17], which has been  
101 independently identified as a susceptibility factor for murine *Plasmodium* infection [18].

102 In the present study, we show that PMIF has a central role in *Plasmodium* liver  
103 replication and cerebral malaria onset. Mechanistically, PMIF activates the hepatocellular MIF  
104 host receptor CD74 to inhibit the apoptosis of infected hepatocytes, thus promoting  
105 *Plasmodium* development and replication. Mice infected with *PbAmif*- sporozoites or *PbAWT*  
106 infected *Cd74*<sup>-/-</sup> mice are resistant to cerebral malaria. Cerebral malaria onset further relies on  
107 the contribution of endothelial cell CD74, which is upregulated in the brains of infected mice,  
108 to promote parasite antigen presentation to brain sequestered *Plasmodium*-specific CD8<sup>+</sup> T  
109 cells. Pharmacologic inhibition of the PMIF/CD74 interaction by the PMIF-selective, small  
110 molecule antagonist 26k reduces the survival of infected cells, decreases liver-stage parasite  
111 burden, and fully protects mice from acute cerebral malaria.

## 112 Results

### 113 PMIF promotes survival of *Plasmodium*-infected hepatocytes by inhibiting p53 114 activity and contributes to the development of ECM.

115 *P. berghei* ANKA parasites that are genetically deficient in PMIF (*PbAmif*<sup>-</sup>) develop  
116 normally in their mosquito hosts as well as during blood-stage infection [16]. However, we  
117 observed that parasite burden was reduced in HepG2 hepatocytes infected with *PbAmif*-  
118 sporozoites compared with wild-type *PbA* (*PbAWT*) sporozoites (**Figure 1A**). Examination of  
119 circumsporozoite (CSP) and merozoite surface protein-1 (MSP-1) as indicators of parasite  
120 maturation [19] showed that while CSP was expressed in similar levels, there was reduced  
121 expression of MSP-1 in the *PbAmif*- HepG2 infected cells, suggesting that PMIF is not  
122 necessary for hepatocyte infection but may have a permissive role in pre-erythrocytic parasite  
123 development (**Figure 1B, with S1A** showing *PbAHSP70* as a loading control for *PbAMSP*-  
124 1). Mammalian MIF has been shown to promote monocyte survival by increasing  
125 phosphorylation of the pro-apoptotic protein p53 at Ser<sup>15</sup> [11, 13]. We treated infected HepG2  
126 cells with the nitric oxide (NO) donor sodium nitroprusside (SNP) to induce p53 accumulation  
127 and apoptosis. We found that HepG2 cells infected with *PbAmif*- sporozoites were significantly  
128 more susceptible to NO-induced apoptosis than cells cultured with *PbAWT* parasites despite a  
129 reduced infection level when compared with *PbAWT* sporozoites (**Figure 1C**). The protection  
130 from apoptosis observed in *PbAWT* infected HepG2 cells was associated with decreased  
131 phospho-p53<sup>Ser15</sup> and intracellular p53 content when compared with *PbAmif*- infected cells  
132 (**Figure 1D**) [20, 21]. Induction of apoptosis in *PbAmif*- versus *PbAWT* infected cells also was  
133 associated with increased Akt phosphorylation (**Figure S1B**).

134 We confirmed these *in vitro* findings by infecting mice with *PbAWT* or *PbAmif*-  
135 sporozoites. The livers of *PbAmif*-infected mice showed an 80% reduction in parasite burden  
136 compared with the livers of *PbAWT* infected mice, and this was associated with an attendant  
137 decrease in expression of the pro-survival gene *Bcl-2* and an increase in the expression of the  
138 pro-apoptotic gene *Bad* (**Figure S1C**). We next examined the contribution of PMIF to the  
139 development of cerebral malaria. Mice infected with *PbAWT* sporozoites showed neurological  
140 symptoms and mortality within 8-9 days after infection, while mice infected with *PbAmif*-  
141 sporozoites didn't exhibit signs of ECM and survived until day 25 after infection (**Figure S1D**).  
142 When mice were infected with *PbAWT* or *PbAmif*-iRBC, there was no difference in ECM  
143 manifestations, and all the mice succumbed by day seven after infection (**Figure S1F**). Our  
144 results show that PMIF antagonizes hepatocyte apoptotic pathways and promotes initial  
145 sporozoite infection in ECM development.

146

147 **PMIF action is mediated by the host MIF receptor CD74 to promote *Plasmodium*-**  
148 **infected hepatocyte survival and p53 inhibition.**

149 We confirmed the role of PMIF in signaling through the host MIF receptor by studying  
150 sporozoite infection in HepG2 cells after knockdown of CD74. Hepatocytes treated with  
151 shCD74 to reduce CD74 expression had decreased parasite burden compared with treatment  
152 with a non-relevant shRNA (shCon) (**Figure 2A** and **S1G** for the viability of HepG2 cells  
153 before infection). As expected, *PbAWT* infected shCD74-treated cells were more susceptible  
154 to apoptosis than shCon-treated cells (**Figure 2B**). Apoptosis induction also was associated  
155 with increased cellular p53<sup>Ser15</sup> and p53 accumulation in the infected HepG2 cells with reduced  
156 CD74 expression (**Figure 2C**). Infection of mice genetically deficient in the cognate host MIF  
157 receptor CD74 (*Cd74*<sup>-/-</sup>) with *PbAWT* sporozoites revealed a significantly reduced liver burden  
158 of *Plasmodium* parasites than in WT (*Cd74*<sup>+/+</sup>) mice (**Figure 2D**), which was associated with  
159 a delay in blood-stage patency from 2 to 6 days post-infection (**Figure 2E**). These results  
160 support the essential role of CD74 in mediating PMIF action and in promoting *Plasmodium*  
161 pre-erythrocytic development leading to blood-stage infection.

162

163 **CD74 is overexpressed in the brain of *PbAWT* infected mice and contributes to**  
164 **ECM development.**

165 The marked effect of CD74 on the development of *PbAWT* parasites in the liver and  
166 the progression of blood-stage infection prompted us to examine the potential role of CD74 in

167 the pathogenesis of ECM. We measured the expression of CD74 in *Pb*AWT-infected mouse  
168 brains during ECM and observed an increase in *Cd74* mRNA expression compared with  
169 uninfected mice (**Figure 3A**).

170 We next challenged WT and *Cd74*<sup>-/-</sup> mice with *Pb*AWT iRBCs and assessed ECM  
171 development. While 100% of the WT mice exhibited neurological symptoms within 7-8 days  
172 after infection, the *Cd74*<sup>-/-</sup> mice were fully protected from ECM and succumbed to  
173 hyperparasitemia by day 30 after infection (**Figure 3B,C and S2A**). We found no significant  
174 differences in parasitemia between *Pb*AWT-infected WT or *Cd74*<sup>-/-</sup> mice during the  
175 asymptomatic blood-stage, suggesting that *Cd74* deficiency does not affect parasite replication  
176 in the erythrocyte (**Figure S2B**). The same results were observed in *Cd74*<sup>-/-</sup> mice infected with  
177 *PbAmif*- parasites (**Figures S2C, D and E**). The protection of *Cd74*<sup>-/-</sup> mice was associated with  
178 the downregulation of IFN- $\gamma$ , perforin, and granzyme B expression in the brains of *Cd74*<sup>-/-</sup>  
179 versus WT mice but without an appreciable difference in the quantity of brain sequestered  
180 parasites (**Figure 3D and Figure S2F**). To evaluate the contribution of the PMIF/CD74  
181 interaction to the development of ECM, we infected WT mice with *Pb*AWT or *PbAmif*-  
182 sporozoites. We measured the expression of CD74 in the brain of infected mice during ECM  
183 and observed an increase in *Cd74* mRNA expression in *Pb*AWT infected mice compared with  
184 brains of *PbAmif*- infected mice (**Figure S2G**). Additionally, the expression of the  
185 inflammatory molecules IFN- $\gamma$ , perforin, and granzyme B increased in the brain of mice  
186 infected with *Pb*AWT parasites (**Figure S2H**). CD8<sup>+</sup> T cells are essential for the development  
187 of ECM and contribute directly to ECM pathology [22]. Thus, we investigated if CD8<sup>+</sup> T cells  
188 from *Cd74*<sup>-/-</sup> mice have an impaired response to *PbA* infection. We measured the amount of  
189 brain sequestered CD8<sup>+</sup> T cells responding to *PbA* by using a T cell receptor tetramer specific  
190 to the *Pb*AGAP50 antigen [23]. Notably, the amount of brain-sequestered *Pb*AGAP50-  
191 specific CD8<sup>+</sup> T cells was not significantly different between WT and *Cd74*<sup>-/-</sup> mice (**Figure**  
192 **3E**), indicating that *Cd74*<sup>-/-</sup> mice can mount a *Pb*AWT responsive CD8<sup>+</sup> T cells response in the  
193 brain. Nevertheless, in *Cd74*<sup>-/-</sup> mice, CD8 T cell effector functions were strongly suppressed,  
194 as indicated by the reduced frequency of *Pb*GAP50-specific CD8<sup>+</sup> T cells expressing the ECM  
195 associated inflammatory molecule granzyme B (**Figure 3F**). Our findings suggest that *Pb*AWT  
196 responsive CD8<sup>+</sup> T cells from *Cd74*<sup>-/-</sup> mice undergo priming and trafficking to the brain during  
197 *Pb*AWT blood-stage infection, but do not express the inflammatory effector response  
198 associated with the development of ECM.

199 Brain vascular endothelium becomes activated during malaria infection with the ability  
200 to process and cross-present *Plasmodium* antigens [23], and contribute to the T cell effector

201 response and inflammation that underlies ECM [22]. In addition to CD74's role as the cognate  
202 MIF receptor [12], it functions intracellularly as the MHC class II invariant chain [24] and it  
203 has been implicated in an MHC class I cross-presentation pathway for cytolytic T lymphocytes  
204 (CTL) [25]. We hypothesized that CD74 expressed by activated brain endothelium may cross-  
205 present *PbA* antigens to prime infiltrating CD8<sup>+</sup>T cells. Accordingly, we assessed the ability  
206 of *PbA* antigen-pulsed, brain-derived endothelial to activate T cells by employing the LR-  
207 BSL8.4a reporter T cell line that expresses LacZ in response to the *PbA*-GAP50 epitope [8].  
208 *Cd74*<sup>-/-</sup> brain-derived endothelial cells were less able to activate LR-BSL8.4a T cells in the  
209 presence of *PbA* antigens when compared to WT brain-derived endothelial cells (**Figure 3G**).  
210 We confirmed these results by isolating brain microvessels from *PbA*WT infected WT and  
211 *Cd74*<sup>-/-</sup> mice at the time of ECM development and incubating them with LR-BSL8.4a reporter  
212 T cells for measurement of LacZ expression. Microvessels from *PbA*-infected WT mice  
213 showed a greater ability to cross-present *PbA* antigens than microvessels from *Cd74*<sup>-/-</sup> mice  
214 (**Figure 3H**). These results suggest a specific role for brain endothelial CD74 in the  
215 presentation of *PbA* antigens to CD8<sup>+</sup> T cells. Because *Cd74* expression in the brain is  
216 upregulated by PMIF (**Figure S2G**) we next tested if PMIF also has a role in the cross-  
217 presentation of *Plasmodium* antigens mediated by CD74. We isolated brain microvessels from  
218 mice infected with *PbA*WT or *PbAmif*<sup>-</sup> sporozoites at the time of ECM onset and incubated  
219 them with LR-BSL8.4a reporter T cells. We observed that microvessels from mice infected  
220 with *PbA*WT parasites exhibited a greater ability to cross-present *PbA* antigen  
221 than microvessels from *PbAmif*<sup>-</sup> infected mice (**Figure S2I**).

222 We examined if a dysfunctional cytotoxic response in CD74 deficient CD8<sup>+</sup> T cells  
223 reduced ECM symptoms. For this we adoptively transferred WT or *Cd74*<sup>-/-</sup> CD8<sup>+</sup> T cells, into  
224 naïve *Cd8*<sup>-/-</sup> or *Cd8*<sup>-/-</sup>*Cd74*<sup>-/-</sup> recipient mice by infection with *PbA* iRBCs three days later.  
225 Recipient *Cd8*<sup>-/-</sup> mice that received WT or *Cd74*<sup>-/-</sup> CD8<sup>+</sup> T cells from *PbA* infected mice  
226 showed signs of ECM and succumbed by day 10, whereas recipient *Cd8*<sup>-/-</sup> *Cd74*<sup>-/-</sup> mice  
227 receiving WT or *Cd74*<sup>-/-</sup> CD8<sup>+</sup> T cells from *PbA* infected mice did not show ECM symptoms  
228 and succumbed by 20 days after infection (**Figure S2J**). We next assessed cross-presentation  
229 of *PbA* antigens *ex vivo* by using brain microvessels from *Cd8*<sup>-/-</sup> and *Cd8*<sup>-/-</sup>*Cd74*<sup>-/-</sup> mice infected  
230 with *PbA* after adoptive transfer with CD8<sup>+</sup> T cells from WT or *Cd74*<sup>-/-</sup> mice. Only *Cd8*<sup>-/-</sup> mice  
231 that received *Cd8*<sup>+</sup> or *Cd8*<sup>-/-</sup>*Cd74*<sup>-/-</sup> T cells cross-present *PbA* antigens (**Figure S2K**). Together  
232 these results indicate that CD74 expression by brain endothelial cells contributes to cross-  
233 presentation of *PbA* to CD8<sup>+</sup> T cells and ECM development.

234 Finally, we assessed the potential clinical significance of anti-PMIF antibodies, which  
235 circulate in malaria patients [26], by measuring their ability to interfere with PMIF binding to  
236 CD74 *in vitro*. Using an established ELISA-based binding assay [27, 28], we observed that  
237 such sera inhibited PMIF binding to the recombinant CD74 ectodomain when compared to sera  
238 from uninfected healthy controls, and moreover, that sera from patients with clinically  
239 uncomplicated malaria were more effective in reducing PMIF/CD74 interaction than sera from  
240 patients with complicated malaria (*e.g.*, severe anemia, cerebral malaria [17]) (**Figure S2L**).  
241 These data suggest a possible role for an anti-PMIF antibody response in clinical sequelae that  
242 warrants further investigation.

243

#### 244 **Pharmacologic PMIF antagonism reduces *PbA* infection and protects against** 245 **cerebral malaria.**

246 Our experimental results support a central role for CD74 and its activation by PMIF in  
247 malaria infection by promoting parasite liver replication, blood-stage infection, and subsequent  
248 ECM pathophysiology. Small molecule MIF inhibitors have been developed and are in clinical  
249 evaluation [29, 30]. We recently identified a small molecule PMIF antagonist, termed 26k, with  
250 low selectivity for host MIF ( $K_i = 40$  nM for PMIF versus  $K_i >100$   $\mu$ M for MIF) [31] that  
251 blocks PMIF interaction with the CD74 ectodomain [28] and downstream ERK1/2 MAPK  
252 signaling (**Figure S3A**). We treated *PbA* sporozoite infected hepatocytes with 26k *in vitro* and  
253 measured parasite burden by expression of *PbA18s* RNA together with sensitivity to apoptosis  
254 induction. Parasite burden decreased in the cells treated with 26k compared with vehicle  
255 (**Figure 4A**). Hepatocytes infected with *PbA* and treated with 26k also were more susceptible  
256 to apoptosis as evidenced by Annexin V staining. Moreover, treated cells showed increased  
257 p53 phosphorylation and intracellular accumulation, a known consequence of CD74 blockade  
258 [11] (**Figure 4B, C**).

259 To determine if these results could be translated *in vivo*, we treated C57BL/6J mice  
260 with 26k before infection with  $2 \times 10^3$  *PbA* sporozoites and then once daily for 2 days. Liver-  
261 stage infection, blood-stage patency, and the development of cerebral malaria and lethality  
262 were assessed. Treatment with three doses of 26k (0, 24, 48 h) dramatically decreased parasite  
263 burden in the liver at 48 h after infection compared with vehicle controls (**Figure 4D, E**).  
264 Sporozoite infection, in turn, led to blood-stage patency after 3 days in vehicle-treated mice  
265 but not until day 5 in the 26k treated group (**Figure S3B**). All vehicle-treated mice developed  
266 ECM symptoms (head deviation, ataxia, and paraplegia) 8 days after sporozoite infection, and



267 all mice succumbed to cerebral malaria by days 9-10. By contrast, all mice treated with 26k  
268 were spared from cerebral malaria symptoms and did not succumb until day 30 (**Figure 4F**).

269 We also examined the impact of 26k on *Plasmodium* antigen cross-presentation by  
270 brain microvascular endothelial cells. Brain microvessels from *PbA* infected WT mice were  
271 isolated at the time of ECM and treated *in vitro* with 26k (or vehicle) together with LR-BSL8.4a  
272 reporter T cells. LacZ expression was then measured after overnight incubation. Only  
273 microvessels from *PbA*-infected mice treated with vehicle were able to cross-present *PbA*  
274 antigen and induce LacZ expression (**Figure 4G**). We also examined if 26k administration  
275 prevented ECM when mice were inoculated directly with *PbA*-infected erythrocytes. We  
276 observed only partial protection from ECM in mice treated with 26k in this model (**Figure**  
277 **S3C**), suggesting that the dominant effect of 26k is on liver-stage *PbA* development. Taken  
278 together, these results support the conclusion that pharmacologic inhibition of the PMIF/CD74  
279 interaction may be a promising approach to protect from liver infection and ECM.

280

## 281 **Discussion**

282 *Plasmodium* parasites have evolved highly specialized strategies for host invasion,  
283 evading immune destruction, and sustaining infection to ensure their life cycle completion.  
284 Our study highlights the importance of the pre-erythrocytic phase of malaria infection as an  
285 essential stage in the development of host immune responses and the subsequent progression  
286 of ECM. This has important implications for the investigation of *Plasmodium* genes whose  
287 pathologic relevance may be underestimated based on the route of the infection.

288 Our data indicate that PMIF, which appears to be universally expressed by the  
289 *Plasmodium* genus [30, 31], and its interaction with hepatocyte CD74 is an adaptive  
290 mechanism for sporozoites to usurp a host-protective apoptosis pathway in order to prevent  
291 their destruction and enable parasite differentiation and patent infection. PMIF appears to  
292 impact *Plasmodium* liver development without influencing its infectivity of host hepatocytes  
293 [14, 15]. Moreover, inhibition of PMIF activity by vaccination is associated with a higher  
294 frequency of memory liver resident CD8+ T cells [15]. Complementary genetic studies also  
295 indicate that relative increases in liver CD74 expression correlate with susceptibility to  
296 successful host hepatocyte infection [18]. Immunostaining studies suggest that PMIF is  
297 expressed on the surface of infective sporozoites and within the parasitophorous vacuole during  
298 the liver stage development [14, 16]. The precise localization of PMIF interaction with host  
299 CD74 is currently unclear; however, we suggest two possible scenarios. The first is by contact  
300 between PMIF on the invading sporozoite and CD74 expressed on the hepatocyte cell surface,

301 leading to the activation of Akt and cellular pro-survival pathways [4]. The second is after  
302 sporozoite internalization and contact between PMIF in the parasitophorous vacuole and  
303 endosomal-expressed CD74 during later-stage *Plasmodium* development [32].

304 PMIF additionally promotes the expression of CD74 in the brain of infected mice, and  
305 our data support a distinct and previously unforeseen role in the cross-presentation of  
306 *Plasmodium* antigens to promote a CD8+ T cell-mediated, pathologic inflammatory response.  
307 Prior studies have reported that IFN $\gamma$  enhances cell surface expression of CD74 [33], and  
308 during cerebral malaria, the expression of IFN $\gamma$  increases in the brain [34], contributing to the  
309 induction of CD74 expression in EC. While dendritic cells are considered the major antigen-  
310 presenting cells responsible for activating CD4 and CD8 T cell responses against *Plasmodium*  
311 [35], endothelial cells are major contributors to blood-brain barrier breakdown and  
312 neurological disease, and also contribute in this respect [8, 23]. Our data suggest that CD74  
313 promotes the cross-presentation of *Plasmodium* antigen by brain EC to promote ECM  
314 development,

315 We additionally show that the PMIF/CD74 interaction pathway is amenable to  
316 pharmacologic targeting. The PMIF selective antagonist 26k [28,29] recapitulates the effect  
317 observed by the absence of PMIF or its host receptor *Cd74*. 26k reduces *Plasmodium*  
318 intrahepatic development and provides full protection against cerebral malaria in the *PbA*  
319 model of disease. These results, together with precedent co-crystallization studies supporting  
320 the selectivity of 26k for PMIF versus host MIF, provide proof-of-concept for pharmacologic  
321 PMIF antagonism as a tractable approach for both malaria prophylaxis and liver-stage  
322 treatment, and potentially across a range of *Plasmodium* species and strains [29]. PMIF is  
323 extremely conserved among *Plasmodium* species, with only 5 single nucleotide  
324 polymorphisms in PMIF among the 202 sequenced strains of *P. falciparum* present in the  
325 PlasmoDB resource [9, 10]. This high degree of structural conservation may be auspicious for  
326 therapeutic targeting, particularly in a genomically complex pathogen prone to resistance  
327 development. Additional studies to optimize the absorption, distribution, metabolism and  
328 excretion properties of 26k will be necessary to advance PMIF selective inhibitors such as 26K  
329 into clinical development.

330

331 **Materials and Methods**

332

333 **Mice**

334 Female WT or *Cd74*<sup>-/-</sup> C57BL/6J mice between 6-10 weeks of age were purchased from The  
335 Jackson Laboratory and used for study. *Cd8*<sup>-/-</sup>*Cd74*<sup>-/-</sup> mice were obtained by crossing *Cd8*<sup>-/-</sup>  
336 with *Cd74*<sup>-/-</sup> mice. Swiss Webster mice were obtained from The Jackson Laboratory. All  
337 animals were maintained in specific pathogen-free facility at Yale Animal Resource Center.  
338 All animal procedures followed federal guidelines and were approved by the Yale University  
339 Animal Care and Use Committee, approval number 2017-10929.

340 **Parasites and infection**

341 *Pb*AWT (MR4), *PbAmif*<sup>-</sup> (Leiden Malaria Group) [16] or *Pb*AWT-GFP-luciferase (MR4)  
342 parasites were cycled between Swiss Webster mice and *Anopheles stephensi* mosquitoes. For  
343 erythrocytic infection, cryopreserved stocks of infected red blood cells (iRBCs) were injected  
344 ( $10^6$  iRBCs/mouse) and blood parasitemia was monitored by Giemsa-stained blood smears and  
345 flow cytometry [15]. For the pre-erythrocytic stage infection, salivary gland sporozoites were  
346 extracted from infected mosquitoes on day 19 post-blood meal infection. WT or *Cd74*<sup>-/-</sup>  
347 C57BL/6J mice were infected by i.v. tail injection of 2000 *Pb*AWT, *PbAmif*<sup>-</sup> or *Pb*AWT-GFP-  
348 luciferase sporozoites, and blood patency was monitored beginning day 3 by blood smear and  
349 flow cytometry. Liver parasite burden was monitored at 48 h after infection using an IVIS  
350 imaging system (Caliper) or quantitative PCR [15].

351 For adoptive transfer, splenocytes were isolated six days after infection of WT or *Cd74*<sup>-/-</sup> mice  
352 infected with  $10^6$  *Pb*AWT iRBC, CD8 T cells were purified with anti-CD8 (Ly-2, Miltenyi  
353 Biotech) according to the manufacturer's protocol.  $1 \times 10^7$  cells were transferred i.v. into  
354 recipient C57BL/6J *Cd8*<sup>-/-</sup> or *Cd8*<sup>-/-</sup>*Cd74*<sup>-/-</sup> mice, and mice infected three days after with  $10^6$   
355 *Pb*AWT iRBC.

356 **Hepatocyte infection, apoptosis induction, Annexin V assay and quantification of p53 by**  
357 **western blotting**

358 For apoptosis assessment,  $1 \times 10^5$  HepG2 cells (ATCC) were seeded in complete EMEM  
359 medium (ATCC) (10% FBS (Atlanta Biologicals), 1% streptomycin/penicillin (Thermo-  
360 Fisher), and infected with  $2 \times 10^3$  *Pb*AWT or *PbAmif*<sup>-</sup> sporozoites. 48 h after infection, cells  
361 were treated with 1 mM of SNP (Sodium Nitroprusside, Sigma) for 4 h or left untreated as a  
362 control. For PMIF pharmacologic inhibition, cells were treated with 26k (10 nM, 100 nM) or  
363 with an equivalent concentration of vehicle (0.1% DMSO) (Sigma) before infection. Cells then

364 were detached with Acutase (MP Bio) and cell suspensions split for Western blot or Annexin  
365 V analysis. For Annexin V analyses, cells were stained with Pacific Blue-Annexin V and  
366 7AAD (7-aminoactinomycin D) (Biolegend) before running in a LSRII cytometer (BD  
367 Biosciences). For quantification of p53 by western blotting, *Pb*AWT-infected HepG2  
368 hepatocytes were detached with Accutase (MP biolabs) and pelleted. Western blots were  
369 performed by lysing cell pellets in RIPA buffer (ThermoFisher) according to standard protocols  
370 and using antibodies directed against p53-Ser<sup>15</sup> (clone 1C12) or total p53 (pAb) (Cell Signaling  
371 Technology). For quantification, density signals were normalized to an anti- $\beta$ -actin Ab  
372 (LICOR) and developed with anti-mouse or anti-rabbit Abs conjugated with HRP (LI-COR  
373 Biosciences). Membranes were visualized using an Odyssey-Fc imaging system (LI-COR  
374 Biosciences). Each western blot panel was developed from the same membrane that was re-  
375 probed after stripping.

#### 376 **Quantification of liver-stage *Pb*AWT and *Pb*Amif- infection, and *Cd74* knockdown**

377 HepG2 liver cells infected with *Pb*AWT or *Pb*Amif- sporozoites were lysed at 24 h or 48 h  
378 after infection, cellular proteins transferred to PVDF membranes (Millipore), and analyzed by  
379 western blotting using anti-CSP (MRA-100) and anti-MSP-1 (MRA-667) antibodies obtained  
380 from MR4 ATCC (Manassas, VA).  $\beta$ -actin was used as loading control. For treatment with  
381 siRNA, hepatocytes were transfected with 15 pmol of siRNA (Ambion) targeting CD74 mRNA  
382 (3 target sequences in exon 2) or siCtrl (scrambled unrelated sequence) as a negative control.  
383 siRNA was complexed with Lipofectamine RNAimax reagent (ThermoFisher) and added to  
384 the cells for 24 h; cells then were infected with *Pb*AWT sporozoites.

#### 385 **Murine *Pb*A infection and 26k treatment**

386 C57BL/6J mice received three i.p. injections of 26k (4-(3-methoxy-5-methylphenoxy)-2-(4-  
387 methoxyphenyl)-6-methylpyridine) [31], synthesized by CheminPharma LLC (Branford,  
388 Connecticut), at 80 mg/kg after dissolution in PEG400 (Sigma-Aldrich) in a sonicating water  
389 bath. HP-P-cyclodextrin (Sigma-Aldrich) was added to prepare a 4 mg/ml solution. Control  
390 mice received vehicle alone. Immediately after the first i.p. injection, mice were infected i.v.  
391 with  $2 \times 10^3$  *Pb*A-luc-GFP sporozoites; the second and third injections of 26k were given 24 h  
392 and 48 h later, and always after measurement of *Pb*A liver burden. The *Pb*A liver burden was  
393 quantified 48 h after infection by luminescence emission after luciferin injection (Perkin  
394 Elmer) using an IVIS apparatus (Caliper). Livers were excised 48 h after infection, the total  
395 RNA extracted and purified with Trizol (Life Technologies), and parasites quantified by RT-  
396 qPCR using primers for *Pb*18s.

397 **Brain microvessel cross-presentation assay**

398 WT, *Cd74*<sup>-/-</sup>, *Cd8*<sup>-/-</sup> or *Cd8*<sup>-/-</sup>*Cd74*<sup>-/-</sup> C57BL/6J mice were infected by intravenous injection of  
399 sporozoites or by intraperitoneal injection of *PbA* infected red blood cells. Infected mice were  
400 sacrificed when the signs of ECM (head deviation, ataxia) were manifested. Control naïve mice  
401 were sacrificed contemporaneously with the experimental group. The technique for isolating  
402 brain microvessels and quantification of cross-presentation of the parasite-derived GAP50  
403 epitope by LR-BSL8.4a reporter T cells [23] was performed according to the published  
404 protocol [22]. Quantification of  $\beta$ -galactosidase activity by activated LR-BSL8.4a reporter  
405 cells was performed by using a luminescence  $\beta$ -galactosidase assay (ThermoFisher) and the  
406 resultant signal quantified with a microplate reader (Tecan).

407 **Isolation of Brain-infiltrating lymphocytes for flow cytometry.**

408 Naïve or infected WT and *Cd74*<sup>-/-</sup> C57BL/6J mice were sacrificed and perfused intra-cardially  
409 with 20 ml 1x DPBS ('Dulbecco's Phosphate Buffer Saline). Brains were minced in RPMI,  
410 digested with 10  $\mu$ g/ml of DNase I (Sigma) and 0.5 mg/ml for 30 min at 37°C, and  
411 homogenized with a pestle then filtered with a 70  $\mu$ m cell-strainer (BD Falcon). The suspension  
412 then was centrifuged at 200xg for 5min, and the pellet resuspended in 90% Percoll (GE  
413 Healthcare) and overlaid with a 70%, 50% and 30% Percoll gradient. After centrifugation at  
414 500xg for 10 min, the cell interphase was collected treated with RBC lysis buffer, washed once,  
415 and resuspended in complete RPMI medium (containing 10% FBS (Atlanta Biologicals) and  
416 1% penicillin-streptomycin (Thermo Fisher)). 100  $\mu$ l of brain cell suspensions were stimulated  
417 with 1  $\mu$ M of peptide (SLLNAKYL) in the presence of 10  $\mu$ g/ml Brefeldin A. After 5 h  
418 incubation at 37°C, the cells were centrifuged and washed once with 100  $\mu$ l DPBS + 5% FBS.  
419 The cells then were re-suspended and incubated with FITC-labelled SLLNAKYL-H-<sup>2b</sup>  
420 tetramer for 15 min on ice before staining with anti-CD8-PE Cy7 (clone 53-6.7, Biolegend),  
421 anti-CD4-PerCP Cy 5.5 (clone RM4, Biolegend) and anti-CD11a antibodies in the presence of  
422 FCR-block for 20 min on ice. Cells were washed, pelleted and permeabilized by re-suspension  
423 in 100  $\mu$ l Fix/Perm buffer on ice for 15 min. Cells then were washed once with 1x Perm Wash  
424 buffer (BD Bioscience), and stained with anti-IFN- $\gamma$ -APC-Cy7 (clone XMG1.2, Biolegend),  
425 and GrmzB-Pe-Cy7 (clone NGZB,eBioescience) in 1x Perm Wash buffer (BD Biosciences)  
426 for 20 min on ice. Finally, cells were washed, centrifuged once, and re-suspended in 200  $\mu$ l  
427 PBS+5% FBS for flow cytometry. The data were acquired on a LSRII flow cytometer (BD  
428 Biosciences) and analyzed using the FlowJo software (version 10).

429

### 430 **Patient Samples and PMIF-CD74 binding assay**

431 Sera from a Zambian cohort of *P.falciparum*-infected patients were used in the study [17, 36].  
432 The interaction between PMIF and CD74 was analyzed as previously described [27, 28].  
433 Briefly, 96-well plate were coated with 26 ng/ml of recombinant CD74 ectodomain (aa 114-  
434 243) in PBS and incubated overnight at 4°C. After washing with PBS/0.1% Tween-20, the  
435 plate was blocked with Superblock reagent (Pierce) for 2 hours. Biotinylated recombinant  
436 PMIF (5ng/ml) was incubated for 45 min, with human serum (diluted 1:1000) from a  
437 previously described repository of healthy donors or subjects with uncomplicated or  
438 complicated malaria [17]. After washing and incubation with Streptavidin-HRP (Roche), the  
439 peroxidase substrate 3,3'-5,5'-tetramethylbenzidine (TMB, Roche) was added and after 20 min  
440 incubation the reaction was stopped with 1N H<sub>2</sub>SO<sub>4</sub>/HCl. The results were expressed as the  
441 percentage of binding in the presence versus the absence of serum.

### 442 **Statistical analysis**

443 All statistical analysis was performed as described before (15), using Software Prism v.6.0,  
444 (GraphPad). Statistical significance was indicated at *p* values of less than 0.05, 0.01, or 0.001.  
445 All data were expressed as a mean ± SD of at least two independent experiments. Mouse  
446 survival times were analyzed by the Mantel-Cox log-rank test. All other data were first tested  
447 for Gaussian distribution of values using a D'Agostino-Pearson normality test. The statistical  
448 significance of differences was assessed using the Kruskal-Wallis or Mann-Whitney *U* test for  
449 non-parametric data distribution and ANOVA or Student's *t*-test for parametric data.

### 450 **Ethics Approval**

451 All animal procedures followed federal guidelines and were approved by the Yale University  
452 Animal Care and Use Committee, approval number 2017-10929. De-identified human sera  
453 collected from a prior study were used for in vitro ELISA studies (Yale HIC #0804003730).

454

455

456

457

458

459

460

461 **Figures Legends**

462 **Figure 1. PMIF influences *PbA* liver-stage development and promotes survival of**  
463 ***Plasmodium*-infected hepatocytes by inhibiting p53 activity.**  $1 \times 10^5$  hepatocytes (HepG2  
464 cells) were infected with  $2 \times 10^3$  *PbAWT* or *PbAmif*<sup>-</sup> sporozoites. **A**, Parasite load was measured  
465 by quantitative PCR of *PbA* 18S rRNA relative to host GAPDH 48 h after infection. Data are  
466 from three independent experiments performed in duplicate. Bars represent the mean  $\pm$  SD;  
467 \* $p=0.0286$  by Mann–Whitney test. **B**, Hepatocellular content of CSP and MSP-1 at 24 h and  
468 48 h after infection with  $2 \times 10^3$  *PbAWT* or *PbAmif*<sup>-</sup> sporozoites assessed by western blot  
469 relative to  $\beta$ -actin as loading control.  $1 \times 10^5$  *PbAWT* or *PbAmif*<sup>-</sup> infected hepatocytes were  
470 cultured for 48 h and treated with 1 mM of the NO donor sodium nitroprusside (SNP) for 4 h  
471 to induce apoptosis. **C**, Percentage of apoptotic cells measured by AnnexinV and 7AAD (7-  
472 amino-actinomycin D) staining. Data are from three independent experiments performed in  
473 duplicate. Bars represent the mean  $\pm$  SD; \* $p=0.0133$ ; \*\* $p=0.0011$ ;  $^{\Psi}p<0.0001$ ; by Kruskal-  
474 Wallis test. **D**, Lysates of the same hepatocytes in C were assessed for total p53 and p53<sup>Ser15</sup>  
475 by Western blotting. NI: non-infected. Numerals represent the mean densitometric scanning  
476 ratios. Data are representative of two independent replicates experiments for the western blot  
477 analysis.

478 **Figure 2. The host MIF receptor CD74 mediates PMIF action in promoting *Plasmodium*-**  
479 **infected hepatocyte survival and p53 inhibition.** Cultured hepatocytes ( $1 \times 10^5$  HepG2 cells)  
480 were treated with 10 nM of shRNA directed at CD74 (shCD74) or a control shRNA (shCon),  
481 and infected 24 h later with  $2 \times 10^3$  *PbAWT* sporozoites. **A**, *Cd74* mRNA expression measured  
482 by qPCR in HepG2 after 48h treatment. Data are from three independent experiments  
483 performed in duplicate. Bars represent the mean  $\pm$  SD; \*\* $p=0.002$  by Mann-Whitney test. **B**,  
484 Parasite load was measured by quantitative PCR of *PbA* 18S rRNA relative to host GAPDH.  
485  $1 \times 10^5$  *PbAWT* infected hepatocytes cultured for 48 h were treated with 1 mM of the NO donor  
486 SNP for 4 h to induce apoptosis. Data are from three independent experiments performed in  
487 duplicate. Bars represent the mean  $\pm$  SD; \*\* $p=0.002$  by Mann–Whitney test. **C**, Percentage of  
488 apoptotic cells measured by AnnexinV and 7AAD staining in *PbAWT* infected HepG2 cells  
489 treated with shCon or shCD74. Numerals represent the densitometric scanning ratios. Data are  
490 from three independent experiments performed in duplicate. Bars represent the mean  $\pm$  SD;  
491 \*\* $p=0.0095$  and n.s.=non-significant; by Kruskal-Wallis test. **D**, Lysates of the same  
492 hepatocytes as in B were assessed for total p53 and p53<sup>Ser15</sup> by Western blotting with  $\beta$ -actin  
493 as loading control. NI: non-infected, INF: *PbAWT* infected. Numerals represent the mean

494 densitometric scanning ratios. Data are representative of two independent replicate  
495 experiments for the western blot analysis. **E**, Wild type (WT) or *Cd74*<sup>-/-</sup> C57BL/6J mice were  
496 infected i.v. with 2x10<sup>3</sup> *PbA*-luciferase sporozoites and liver *PbA*-luc load quantified by  
497 luminescence at 48 h after infection. Bars represent the mean ± SD; \*\*p=0.0022; by Mann-  
498 Whitney test. **F**, Kaplan-Meier plots showing the percentage of WT (●) and *Cd74*<sup>-/-</sup> (○)  
499 C57BL/6J mice with blood-stage patency following i.v. infection with 2x10<sup>3</sup> *PbA*-luc  
500 sporozoites. Patency was determined by microscopic enumeration of thin blood smears. Data  
501 are from two independent experiments, with 3-4 animals per group; p<0.0001 by Log-rank  
502 (Mantel Cox) test.

503 **Figure 3. CD74 expression is essential for the development of ECM induced by *PbA***  
504 **infection.** **A**, *Cd74* mRNA expression measured by qPCR in the brains of wild type (WT)  
505 C57BL/6J mice that were either non-infected (NI WT) or infected with 10<sup>6</sup> *PbA* iRBC (INF  
506 WT). Results are shown as mean ± SD from two independent experiments with 6 animals per  
507 group and experiment: #p<0.0001 by Mann-Whitney test. *CD74* deficient (*Cd74*<sup>-/-</sup>) and WT  
508 C57BL/6J mice were infected i.p with 10<sup>6</sup> *PbA* iRBC and the **B**, Kaplan–Meier survival plots  
509 for WT and *Cd74*<sup>-/-</sup> treated mice following infection with *PbA*. Data are from two pooled  
510 independent experiments with 10 animals per group; p < 0.0001 by log-rank (Mantel Cox) test  
511 **C**, peripheral blood parasitemia. Data are shown as mean ± SD of n=10 WT and n=10 *Cd74*<sup>-/-</sup>  
512 mice and pooled from three independent experiments. **D**, Transcriptional expression of IFN $\gamma$ ,  
513 perforin and granzyme B was measured in brain tissue of *PbA* infected WT and *Cd74*<sup>-/-</sup> mice  
514 on day 7 after infection by quantitative real-time PCR. Results are expressed as mean ± SD of  
515 n=6 mice per group pooled from two experiments: \*p=0.0159 and \*p=0.0317 by two-tailed  
516 Mann-Whitney test. Brain infiltrating lymphocytes from WT and *Cd74*<sup>-/-</sup> *PbA* infected mice  
517 were isolated 7 days after infection, and the number of **E**, pathogenic tetramer-labeled brain  
518 CD8<sup>+</sup> T cells (CD8<sup>+</sup>GAP50Tetra<sup>hi</sup>), and expressing **F**, the proinflammatory marker GrzmB  
519 (CD8<sup>+</sup>GAP50Tetra<sup>hi</sup>GrzmB<sup>hi</sup>) measured by flow cytometry. Data are shown as mean ± SD of  
520 n=6 WT and n=6 *Cd74*<sup>-/-</sup> mice and pooled from two independent experiments; n.s.=non-  
521 significant; \*p=0.0022 by two-tailed Mann-Whitney test. Cross-presentation of *PbA*GAP<sub>50</sub> by  
522 brain endothelial cells. **G**, BEC isolated from WT and *Cd74*<sup>-/-</sup> mice were stimulated with 10  
523 ng/ml IFN $\gamma$  for 24 h, and then incubated for additional 24h with *PbA* mature stage iRBCS  
524 before co-culture with LR-BSL8.4a reporter cells overnight prior to  $\beta$ -galactosidase activity  
525 assessment. Data are shown as mean ± SD of three independent biological replicates performed  
526 in triplicate; #p<0.0001 by Mann-Whitney test. **H**, Brain microvessel cross-presentation of



527 *Pb*AGAP<sub>50</sub> from naïve and *Pb*A infected WT and *Cd74*<sup>-/-</sup> mice. Mice were infected with 10<sup>6</sup>  
528 *Pb*A, iRBC and brain microvessels were isolated when WT-infected mice exhibited  
529 neurological signs at 7 days after infection and co-incubated with LR-BSL8.4a reporter cells  
530 for 24 h and then assessed for β-galactosidase activity. Data are shown as mean ± SD of n=6  
531 mice per group and pooled from two independent biological replicates; \*\*p=0.0021 by Mann-  
532 Whitney test.

533 **Figure 4. The small molecule PMIF antagonist 26k reduces *Pb*A infection in cultured**  
534 **hepatocytes and reduces PMIF/CD74 axis dependent survival.** HepG2 cells (1x10<sup>5</sup>  
535 cells/well) were infected with 2x10<sup>3</sup> *Pb*AWT sporozoites and treated with 26k or vehicle. **A**,  
536 Hepatocellular parasite load was measured by quantitative PCR of *Pb*A 18S rRNA relative to  
537 host GAPDH 48 h after treatment with 26k (0.5 nM to 50 μM) or vehicle. Data are from three  
538 independent experiments performed in duplicate. Bars represent the mean ± SD; \*p=0.0336,  
539 \*\*p=0.0021, Ψp=0.0008, #p<0.0001 by Kruskal-Wallis test. **B**, Percentage of apoptotic  
540 *Pb*AWT infected hepatocytes measured by AnnexinV and 7AAD staining after 26k or vehicle  
541 treatment. 1x10<sup>5</sup> *Pb*AWT infected hepatocytes treated with 26K (100 nM) or vehicle were  
542 cultured for 48 h followed by the addition of the NO donor SNP (1 mM) for 4 h to induce  
543 apoptosis. Data are from three independent experiments performed in duplicate. Bars represent  
544 the mean ± SD; \*p=0.0011; by two-tailed Mann-Whitney test. **C**, *Pb*AWT infected hepatocytes  
545 were lysed and assessed for total p53 and p53<sup>Ser15</sup> by Western blotting with β-actin as loading  
546 control. Numerals represent the mean densitometric scanning ratios. Data are representative  
547 of two independent replicate experiments for the western blot analysis. NI: non-infected, INF:  
548 *Pb*A infected. C57BL/6J mice were treated with vehicle or 26k (80 mg/kg, ip) before (0 h), 24  
549 h, and 48 h after i.v. infection with 2x10<sup>3</sup> *Pb*A-luciferase sporozoites. **D**, Liver *Pb*A-luc burden  
550 was quantified by luminescence and **E**, by qPCR of liver *Pb*A 18S rRNA relative to host  
551 GAPDH 48 h after infection. Bars represent the mean ± SD; \*\*p=0.0043 (**D**), \*\*p=0.0079 (**E**);  
552 by Mann-Whitney test. **F**, Kaplan–Meier survival plots for vehicle and 26k treated mice  
553 following infection with *Pb*A-luc sporozoites. Data are from two pooled independent  
554 experiments with 6 animals per group; \*\*p = 0.0023 by log-rank (Mantel Cox) test. **G**, Brain  
555 microvessel cross-presentation of *Pb*AGAP50 from vehicle and 26k treated mice following  
556 infection with *Pb*A-luc sporozoites. Brains microvessels were isolated when vehicle-treated,  
557 infected mice exhibited neurological signs at 9 days after infection and co-incubated with LR-  
558 BSL8.4a reporter cells for 24 h and then assessed for β-galactosidase activity. Data are shown

559 as mean  $\pm$  SD of n=6 mice per group and pooled from two independent biological replicates;  
560 \*\*p=0.0022 by two-tailed Mann-Whitney test.

## 561 **Supplementary Figures**

562 **Figure S1. PMIF promotes hepatocellular Akt phosphorylation, *Plasmodium* sporozoite**  
563 **infection of liver, and the survival of infected hepatocytes *in vivo*.** **A**, Hepatocellular content  
564 of MSP-1 at 48 h after infection with  $2 \times 10^3$  *Pb*AWT or *PbAmif*- sporozoites assessed by  
565 western blot relative to PbHSP70 as loading control. Cultured hepatocytes ( $1 \times 10^5$  HepG2  
566 cells/well) infected with  $2 \times 10^3$  *Pb*AWT or *PbAmif*- sporozoites followed by the addition of 1  
567 mM SNP at 4 h and 48 h after infection. **B**, Lysates were assessed for total Akt and pAkt<sup>Ser473</sup>  
568 by Western blotting with  $\beta$ -actin as loading control. Numerals represent the densitometric  
569 scanning ratios. **C**, C57BL/6J mice were with infected i.v. with  $2 \times 10^3$  *Pb*AWT or *PbAmif*-  
570 sporozoites and hepatic parasite content measured by quantitative PCR of *PbA* 18S rRNA  
571 relative to host GAPDH at 48 h after infection, bars represent the mean  $\pm$  SD; \*\*p=0.0050 by  
572 Mann-Whitney test. The expression of *Bcl-2* and *Bad* were measured by qPCR relative to  
573 *PbA*18s 48 h after infection. Bars represent the mean  $\pm$  SD; \*\*p=0.0072 and \*=0.0278 by  
574 Mann-Whitney test. The results are representative of 2 separate experiments (n=3 mice/group).  
575 **D**, Kaplan–Meier survival plots for C57BL6/J mice infected with  $2 \times 10^3$  *Pb*AWT or *PbAmif*-  
576 sporozoites. Data are from two pooled independent experiments with a total of 6 animals per  
577 group; p<0.0001 by log-rank (Mantel Cox) test. **F**, Kaplan–Meier survival plots for C57BL6/J  
578 mice infected with i.p with  $10^6$  *Pb*AWT or *PbAmif*- iRBC. Data are form three pooled  
579 independent experiments with a total of 6 animals per group. n.s: non-significant by log-rank  
580 (Mantel Cox) test. **G**, Percentage of AnnexinV- cells among cultured hepatocytes ( $1 \times 10^5$   
581 HepG2 cells) treated with 10 nM of shRNA directed at CD74 (shCD74) or a control shRNA  
582 (shCon) for 24h.

583 **Figure S2. CD74 is essential for the development of ECM.** Wild type (WT) and *Cd74*  
584 deficient (*Cd74*<sup>-/-</sup>) C57BL6/J mice were infected i.p with  $10^6$  *PbA* iRBC and **A**, ECM malaria  
585 score was assessed as described before and **B**, peripheral blood parasitemia was measured by  
586 flow cytometry. Bars represent the  $\pm$  SD of n=10 WT and n=10 *Cd74*<sup>-/-</sup> mice and pooled from  
587 three independent experiments; n.s.=non-significant by Two-Way ANOVA. Wild type (WT)  
588 and *Cd74*<sup>-/-</sup> C57BL6/J mice were infected i.p with  $10^6$  *PbAmif* iRBC **C**, Kaplan–Meier  
589 survival plots for WT and *Cd74*<sup>-/-</sup> mice following infection with *PbAmif*. Data are from two  
590 pooled independent experiments with 10 animals per group; p<0.0001 by log-rank (Mantel

591 Cox) test **D**, peripheral blood parasitemia. Data are shown as mean  $\pm$  SD of n=7 WT and n=10  
592 *Cd74<sup>-/-</sup>* mice and pooled from 2 independent experiments. **E**, ECM malaria score was assessed  
593 as described before. **F**, *PbA18s* transcript expression in the brain of infected WT and *Cd74<sup>-/-</sup>*  
594 measured by quantitative real-time PCR 7 days after infection was measured in brains tissue  
595 of *PbA* infected WT and *Cd74<sup>-/-</sup>* mice on day 7 after infection by quantitative real-time PCR.  
596 Results are expressed as mean  $\pm$  SD of n=6 mice per group pooled from two experiments; n.s.:  
597 non-significant by Mann-Whitney test. WT C57BL6/J mice were infected i.v with  $2 \times 10^3$   
598 *PbAWT* or *PbAmif<sup>-</sup>* sporozoites. **G**, CD74 transcript expression in the brain of infected mice  
599 was measured by q-PCR at day 8 after infection. Results are expressed as mean  $\pm$  SD of n=6  
600 mice per group pooled from two experiments; \*\*p=0.0022 by Mann-Whitney test. **H**,  
601 Transcriptional expression of IFN $\gamma$ , Perforin and Granzyme B was measured in brain tissue of  
602 *PbAWT* or *PbAmif<sup>-</sup>* infected WT mice on day 8 after infection by quantitative real-time PCR.  
603 Results are expressed as mean  $\pm$  SD of n=6 mice per group pooled from two experiments;  
604 \*\*p=0.0022 for Perforin and IFN $\gamma$  and \*\*p=0.0317 for Granzyme B, by two-tailed Mann-  
605 Whitney test. **I**, Brain microvessel cross-presentation of *PbAGAP50* from naïve (NI) and  
606 *PbAWT* or *PbAmif<sup>-</sup>* infected WT mice. Mice were infected with *PbAWT* or *PbAmif<sup>-</sup>*  
607 sporozoites and brain microvessels were isolated when *PbAWT*-infected mice exhibited  
608 neurological signs at 7 days after infection. Microvessels then were co-incubated with LR-  
609 BSL8.4a reporter cells for 24 h and then assessed for  $\beta$ -galactosidase activity. Data are shown  
610 as mean  $\pm$  SD of n=6 mice per group and pooled from two independent biological replicates;  
611 \*\*p=0.0021 by Mann-Whitney test. **J**, Brain microvessel cross-presentation of *PbAGAP50*  
612 from *Cd8<sup>-/-</sup>* and *Cd8<sup>-/-</sup>Cd74<sup>-/-</sup>* receiving CD8<sup>+</sup> T cells isolated from *PbA* infected WT or *Cd74<sup>-/-</sup>*  
613 *<sup>-/-</sup>* mice three days before the infection with  $10^6$  *PbAWT* iRBC. Brain microvessels were isolated  
614 when the first infected mice exhibited neurological signs at 7 days after infection and co-  
615 incubated with LR-BSL8.4a reporter cells for 24 h and then assessed for  $\beta$ -galactosidase  
616 activity. Data are shown as mean  $\pm$  SD of n=5 mice per group and pooled from two independent  
617 biological replicates; # p=0.0017 and \*\*p<0.0001 by Kruskal-Wallis test. **K**, Kaplan-Meier  
618 survival plots for C57BL6/J mice *Cd8<sup>-/-</sup>* and *Cd8<sup>-/-</sup>Cd74<sup>-/-</sup>* receiving CD8<sup>+</sup> T cells isolated from  
619 *PbA* infected WT or *Cd74<sup>-/-</sup>* and infected with i.p with  $10^6$  *PbAWT* iRBC. Data are from three  
620 pooled independent experiments with 6 animals per group; p<0.0001 by log-rank (Mantel Cox)  
621 test. **L**. Effect of human serum on PMIF binding to the immobilized human CD74 ectodomain  
622 (aa 134-232). Measured values are relative to control without serum for each condition (n=6  
623 healthy uninfected controls, n=6 uncomplicated malaria, n=6 complicated malaria. Mean $\pm$ SD;  
624 #p<0.0001 by 1-way ANOVA.

625 **Figure S3. The small molecule PMIF antagonist 26k reduces PMIF/CD74 signal**  
626 **transduction and protects from ECM. A.** BMDM were treated with or without recombinant  
627 PMIF pre-incubated with vehicle control (DMSO) or small molecule 26k (10,50 or 100 nM)  
628 for 2h. Cells were lysed and the lysates assessed for total ERK and pERK<sup>Thr202/Tyr204</sup> by western  
629 blotting. C57BL/6J mice were treated with vehicle or 26k (80 mg/kg, ip) before (0 h), 24 h,  
630 and 48 h after i.v. infection with  $2 \times 10^3$  *PbA*-luciferase sporozoites. Numerals represent the  
631 densitometric scanning ratios. **B,** Kaplan-Meier plots showing the percentage of vehicle (o)  
632 and 26k (●) treated mice with blood-stage patency following i.v. infection with  $2 \times 10^3$  *PbA*-luc  
633 sporozoites. Patency was determined by microscopic enumeration of thin blood smears. Data  
634 are from two pooled independent experiments, with 6 animals per group;  $p < 0.0001$  by Log-  
635 rank (Mantel Cox) test. **C,** Kaplan–Meier survival plots for vehicle (o) and 26k (●) treated mice  
636 following infection with *PbA* iRBC. Data are from two pooled independent experiments with  
637 8 animals per group;  $p = 0.0137$  by log-rank (Mantel Cox) test

638 **Figure S4. Suppression of *Plasmodium* MIF-CD74 Signaling Protects Against Severe**  
639 **Malaria.** After the bite of infected *Anopheles* mosquitoes, *Plasmodium* sporozoites transit  
640 through the bloodstream to invade the liver. (1) PMIF through the interaction with its host  
641 receptor CD74 promotes *Plasmodium*-infected hepatocyte survival via p53 inhibition. This  
642 results in blood-stream emergence and erythrocyte infection. Circulating iRBCs bind to brain  
643 endothelium initiating activation and promoting parasite adhesion and accumulation. PMIF  
644 binds with CD74, and increases CD74 transcription and cross-presentation of *Plasmodium*  
645 antigens by endothelial cells to sequestered CD8<sup>+</sup> T cells that produce inflammatory molecules  
646 including Granzyme B, Perforin and IFN $\gamma$ , leading to Blood Brain Barrier (BBB) breakdown  
647 and leakage. The absence of PMIF (2) or inhibition of PMIF binding to the CD74 ectodomain  
648 by the small molecule PMIF antagonist 26k (3) promotes *Plasmodium*-infected hepatocyte  
649 apoptosis and p53 activation. This results in a delayed blood patency. Circulating iRBCs still  
650 bind to brain endothelium receptors, initiating endothelial cell activation and parasite adhesion  
651 and accumulation. Nevertheless, inhibition or absence of binding between PMIF and CD74  
652 decreases cross-presentation of *PbA* antigens by endothelial cells to CD8<sup>+</sup>T cells and results  
653 in reduced Granzyme B, Perforin and IFN $\gamma$  production and protection of BBB integrity.

654

655

656

657 **References**

658

- 659 1. WHO. World malaria report 2019. 2019.
- 660 2. van de Sand C, Horstmann S, Schmidt A, Sturm A, Bolte S, Krueger A, et al. The liver  
661 stage of *Plasmodium berghei* inhibits host cell apoptosis. *Molecular Microbiology*.  
662 2005;58(3):731-42. doi: 10.1111/j.1365-2958.2005.04888.x.
- 663 3. Leirião P, Albuquerque SS, Corso S, Van Gemert G-J, Sauerwein RW, Rodriguez A,  
664 et al. HGF/MET signalling protects *Plasmodium*-infected host cells from apoptosis. *Cellular*  
665 *Microbiology*. 2005;7(4):603-9. doi: 10.1111/j.1462-5822.2004.00490.x.
- 666 4. Kaushansky A, Ye Albert S, Austin Laura S, Mikolajczak Sebastian A, Vaughan  
667 Ashley M, Camargo N, et al. Suppression of Host p53 Is Critical for *Plasmodium* Liver-Stage  
668 Infection. *Cell Reports*. 2013;3(3):630-7. doi: <http://doi.org/10.1016/j.celrep.2013.02.010>.
- 669 5. Langhorne J, Ndungu FM, Sponaas A-M, Marsh K. Immunity to malaria: more  
670 questions than answers. *Nature Immunology*. 2008;9:725. doi: 10.1038/ni.f.205.
- 671 6. Milner DA, Whitten RO, Kamiza S, Carr R, Liomba G, Dzamalala C, et al. The  
672 systemic pathology of cerebral malaria in African children. *Frontiers in Cellular and Infection*  
673 *Microbiology*. 2014;4(104). doi: 10.3389/fcimb.2014.00104.
- 674 7. Shaw TN, Stewart-Hutchinson PJ, Strangward P, Dandamudi DB, Coles JA, Villegas-  
675 Mendez A, et al. Perivascular Arrest of CD8+ T Cells Is a Signature of Experimental Cerebral  
676 Malaria. *PLOS Pathogens*. 2015;11(11):e1005210. doi: 10.1371/journal.ppat.1005210.
- 677 8. Howland SW, Poh CM, Rénia L. Activated Brain Endothelial Cells Cross-Present  
678 Malaria Antigen. *PLOS Pathogens*. 2015;11(6):e1004963. doi: 10.1371/journal.ppat.1004963.
- 679 9. Aurrecochea C, Brestelli J, Brunk BP, Dommer J, Fischer S, Gajria B, et al.  
680 PlasmoDB: a functional genomic database for malaria parasites. *Nucleic Acids Research*.  
681 2008;37(suppl\_1):D539-D43. doi: 10.1093/nar/gkn814.
- 682 10. Aurrecochea C, Barreto A, Basenko EY, Brestelli J, Brunk BP, Cade S, et al.  
683 EuPathDB: the eukaryotic pathogen genomics database resource. *Nucleic Acids Research*.  
684 2016;45(D1):D581-D91. doi: 10.1093/nar/gkw1105.
- 685 11. Mitchell RA, Liao H, Chesney J, Fingerle-Rowson G, Baugh J, David J, et al.  
686 Macrophage migration inhibitory factor (MIF) sustains macrophage proinflammatory function  
687 by inhibiting p53: Regulatory role in the innate immune response. *Proceedings of the National*  
688 *Academy of Sciences*. 2002;99(1):345-50. doi: 10.1073/pnas.012511599.
- 689 12. Leng L, Metz CN, Fang Y, Xu J, Donnelly S, Baugh J, et al. MIF Signal Transduction  
690 Initiated by Binding to CD74. *The Journal of Experimental Medicine*. 2003;197(11):1467-76.  
691 doi: 10.1084/jem.20030286.
- 692 13. Kamir D, Zierow S, Leng L, Cho Y, Diaz Y, Griffith J, et al. A *Leishmania*  
693 Ortholog of Macrophage Migration Inhibitory Factor Modulates Host Macrophage Responses.  
694 *The Journal of Immunology*. 2008;180(12):8250-61. doi: 10.4049/jimmunol.180.12.8250.
- 695 14. Miller JL, Harupa A, Kappe SHI, Mikolajczak SA. *Plasmodium yoelii* Macrophage  
696 Migration Inhibitory Factor Is Necessary for Efficient Liver-Stage Development. *Infection and*  
697 *Immunity*. 2012;80(4):1399-407. doi: 10.1128/iai.05861-11.
- 698 15. Baeza Garcia A, Siu E, Sun T, Exler V, Brito L, Hekele A, et al. Neutralization of the  
699 *Plasmodium*-encoded MIF ortholog confers protective immunity against malaria infection.  
700 *Nature Communications*. 2018;9(1):2714. doi: 10.1038/s41467-018-05041-7.
- 701 16. Augustijn KD, Kleemann R, Thompson J, Kooistra T, Crawford CE, Reece SE, et al.  
702 Functional Characterization of the *Plasmodium falciparum* and *P. berghei* Homologues of  
703 Macrophage Migration Inhibitory Factor. *Infection and Immunity*. 2007;75(3):1116-28. doi:  
704 10.1128/iai.00902-06.

- 705 17. Sun T, Holowka T, Song Y, Zierow S, Leng L, Chen Y, et al. A Plasmodium-encoded  
706 cytokine suppresses T-cell immunity during malaria. *Proceedings of the National Academy of*  
707 *Sciences*. 2012;109(31):E2117–E26. doi: 10.1073/pnas.1206573109.
- 708 18. Kaushansky A, Austin LS, Mikolajczak SA, Lo FY, Miller JL, Douglass AN, et al.  
709 Susceptibility to Plasmodium yoelii Preerythrocytic Infection in BALB/c Substrains Is  
710 Determined at the Point of Hepatocyte Invasion. *Infection and Immunity*. 2015;83(1):39-47.  
711 doi: 10.1128/iai.02230-14.
- 712 19. Prudêncio M, Mota MM, Mendes AM. A toolbox to study liver stage malaria. *Trends*  
713 *in Parasitology*. 2011;27(12):565-74. doi: 10.1016/j.pt.2011.09.004.
- 714 20. Lue H, Thiele M, Franz J, Dahl E, Speckgens S, Leng L, et al. Macrophage migration  
715 inhibitory factor (MIF) promotes cell survival by activation of the Akt pathway and role for  
716 CSN5/JAB1 in the control of autocrine MIF activity. *Oncogene*. 2007;26(35):5046-59.
- 717 21. Shao D, Zhong X, Zhou Y-F, Han Z, Lin Y, Wang Z, et al. Structural and functional  
718 comparison of MIF ortholog from Plasmodium yoelii with MIF from its rodent host. *Molecular*  
719 *Immunology*. 2010;47(4):726-37. doi: <https://doi.org/10.1016/j.molimm.2009.10.037>.
- 720 22. Howland SW, Claser C, Poh CM, Gun SY, Rénia L. Pathogenic CD8+ T cells in  
721 experimental cerebral malaria. *Seminars in Immunopathology*. 2015;37(3):221-31. doi:  
722 10.1007/s00281-015-0476-6.
- 723 23. Howland SW, Poh CM, Gun SY, Claser C, Malleret B, Shastri N, et al. Brain  
724 microvessel cross-presentation is a hallmark of experimental cerebral malaria. *EMBO*  
725 *Molecular Medicine*. 2013;5(7):984-99. doi: 10.1002/emmm.201202273.
- 726 24. Cresswell P. Assembly, Transport, and Function of MHC Class II Molecules. *Annual*  
727 *Review of Immunology*. 1994;12(1):259-91. doi: 10.1146/annurev.iy.12.040194.001355.  
728 PubMed PMID: 8011283.
- 729 25. Basha G, Omilusik K, Chavez-Steenbock A, Reinicke AT, Lack N, Choi KB, et al. A  
730 CD74-dependent MHC class I endolysosomal cross-presentation pathway. *Nature*  
731 *Immunology*. 2012;13:237. doi: 10.1038/ni.2225  
732 <https://www.nature.com/articles/ni.2225#supplementary-information>.
- 733 26. Han C, Lin Y, Shan G, Zhang Z, Sun X, Wang Z, et al. Plasma concentration of malaria  
734 parasite-derived macrophage migration inhibitory factor in uncomplicated malaria patients  
735 correlates with parasitemia and disease severity. *Clin Vaccine Immunol*. 2010;17(10):1524-32.  
736 Epub 08/11. doi: 10.1128/CVI.00149-10. PubMed PMID: 20702656.
- 737 27. Cournia Z, Leng L, Gandavadi S, Du X, Bucala R, Jorgensen WL. Discovery of human  
738 macrophage migration inhibitory factor (MIF)-CD74 antagonists via virtual screening. *J Med*  
739 *Chem*. 2009;52(2):416-24. Epub 2008/12/19. doi: 10.1021/jm801100v. PubMed PMID:  
740 19090668; PubMed Central PMCID: PMC2680181.
- 741 28. Pantouris G, Rajasekaran D, Garcia AB, Ruiz VG, Leng L, Jorgensen WL, et al.  
742 Crystallographic and Receptor Binding Characterization of Plasmodium falciparum  
743 Macrophage Migration Inhibitory Factor Complexed to Two Potent Inhibitors. *Journal of*  
744 *Medicinal Chemistry*. 2014;57(20):8652-6. doi: 10.1021/jm501168q.
- 745 29. Cho Y, Crichlow GV, Vermeire JJ, Leng L, Du X, Hodsdon ME, et al. Allosteric  
746 inhibition of macrophage migration inhibitory factor revealed by ibudilast. *Proc Natl Acad Sci*  
747 *USA*. 2010;107(25):11313-8.
- 748 30. Fox RJ, Coffey CS, Cudkowicz ME, Gleason T, Goodman A, Klawiter EC, et al.  
749 Design, rationale, and baseline characteristics of the randomized double-blind phase II clinical  
750 trial of ibudilast in progressive multiple sclerosis. *Contemp Clin Trials*. 2016;50:166-77. doi:  
751 10.1016/j.cct.2016.08.009. PubMed PMID: 27521810; PubMed Central PMCID:  
752 PMC5035622.
- 753 31. Dahlgren MK, Garcia AB, Hare AA, Tirado-Rives J, Leng L, Bucala R, et al. Virtual  
754 Screening and Optimization Yield Low-Nanomolar Inhibitors of the Tautomerase Activity of

- 755 Plasmodium falciparum Macrophage Migration Inhibitory Factor. *Journal of Medicinal*  
756 *Chemistry*. 2012;55(22):10148-59. doi: 10.1021/jm301269s.
- 757 32. Lopes da Silva M, Thieleke-Matos C, Cabrita-Santos L, Ramalho JS, Wavre-Shapton  
758 ST, Futter CE, et al. The host endocytic pathway is essential for Plasmodium berghei late liver  
759 stage development. *Traffic (Copenhagen, Denmark)*. 2012;13(10):1351-63. Epub 2012/07/12.  
760 doi: 10.1111/j.1600-0854.2012.01398.x. PubMed PMID: 22780869.
- 761 33. Tanese K, Hashimoto Y, Berkova Z, Wang Y, Samaniego F, Lee JE, et al. Cell Surface  
762 CD74-MIF Interactions Drive Melanoma Survival in Response to Interferon- $\gamma$ . *The Journal of*  
763 *investigative dermatology*. 2015;135(11):2775-84. Epub 2015/06/04. doi:  
764 10.1038/jid.2015.204. PubMed PMID: 26039541; PubMed Central PMCID:  
765 PMC4640965.
- 766 34. Villegas-Mendez A, Strangward P, Shaw TN, Rajkovic I, Tosevski V, Forman R, et al.  
767 Gamma Interferon Mediates Experimental Cerebral Malaria by Signaling within Both the  
768 Hematopoietic and Nonhematopoietic Compartments. *Infection and immunity*.  
769 2017;85(11):e01035-16. doi: 10.1128/IAI.01035-16. PubMed PMID: 28874445.
- 770 35. Fernandez-Ruiz D, Lau LS, Ghazanfari N, Jones CM, Ng WY, Davey GM, et al.  
771 Development of a Novel CD4(+) TCR Transgenic Line That Reveals a Dominant Role for  
772 CD8(+) Dendritic Cells and CD40 Signaling in the Generation of Helper and CTL Responses  
773 to Blood-Stage Malaria. *Journal of immunology (Baltimore, Md : 1950)*. 2017;199(12):4165-  
774 79. Epub 2017/11/01. doi: 10.4049/jimmunol.1700186. PubMed PMID: 29084838; PubMed  
775 Central PMCID: PMC5713497.
- 776 36. Thuma PE, van Dijk J, Bucala R, Debebe Z, Nekhai S, Kuddo T, et al. Distinct clinical  
777 and immunologic profiles in severe malarial anemia and cerebral malaria in Zambia. *The*  
778 *Journal of infectious diseases*. 2011;203(2):211-9. Epub 2011/02/04. doi:  
779 10.1093/infdis/jiq041. PubMed PMID: 21288821; PubMed Central PMCID:  
780 PMC3071068.
- 781

**Fig 1**

**A**

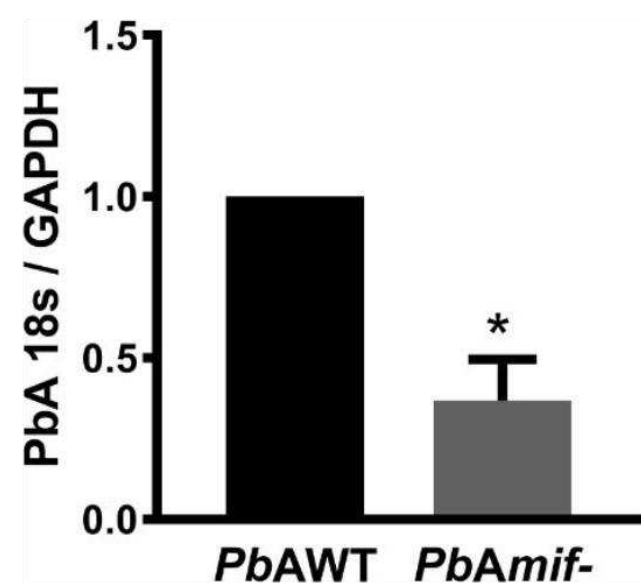

**B**

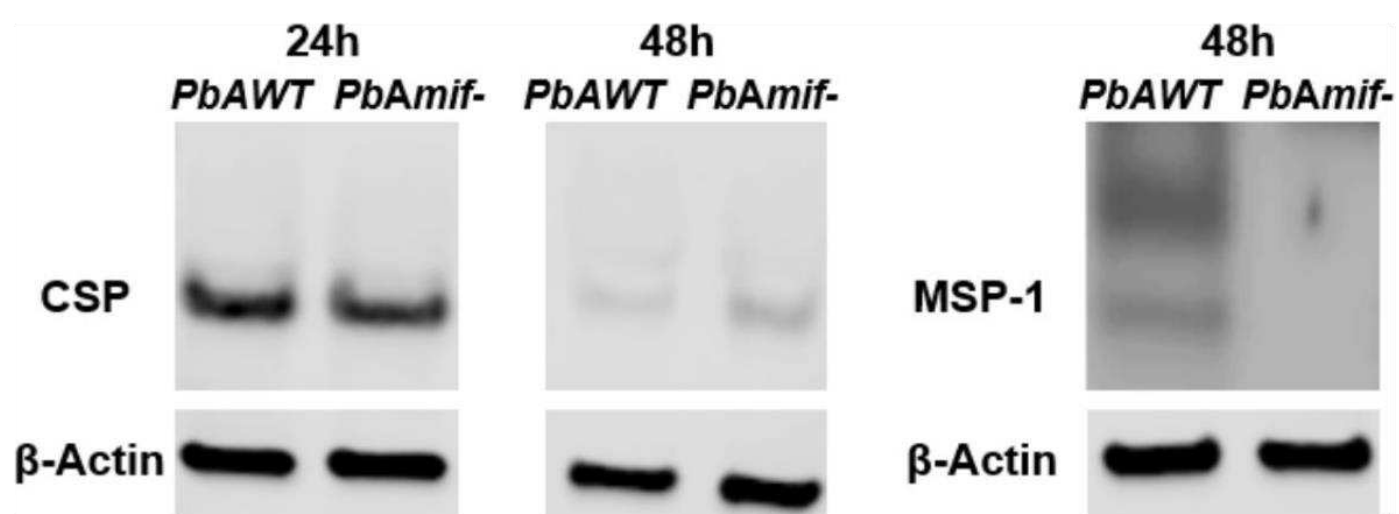

**C**

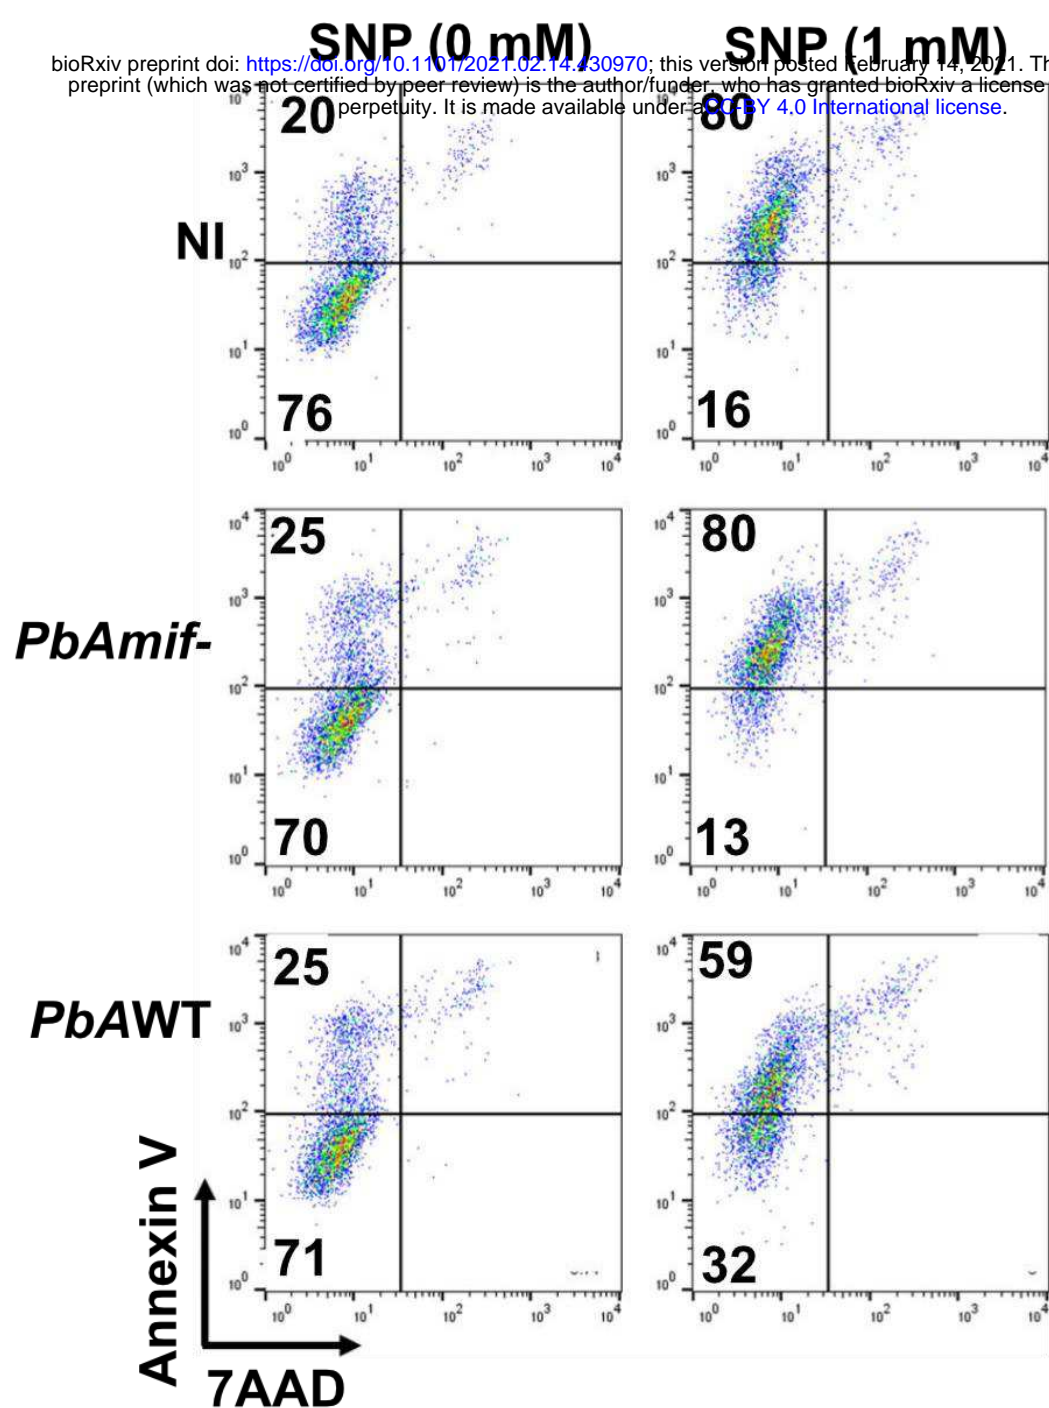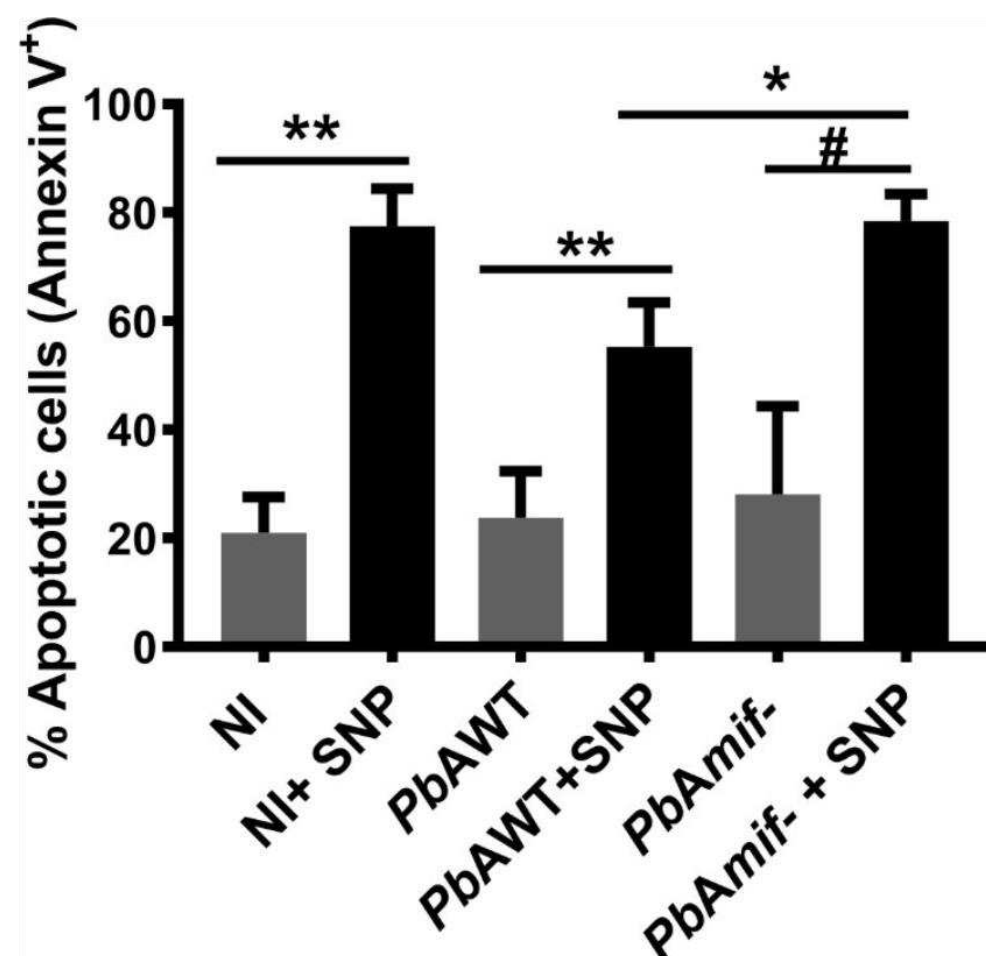

**D**

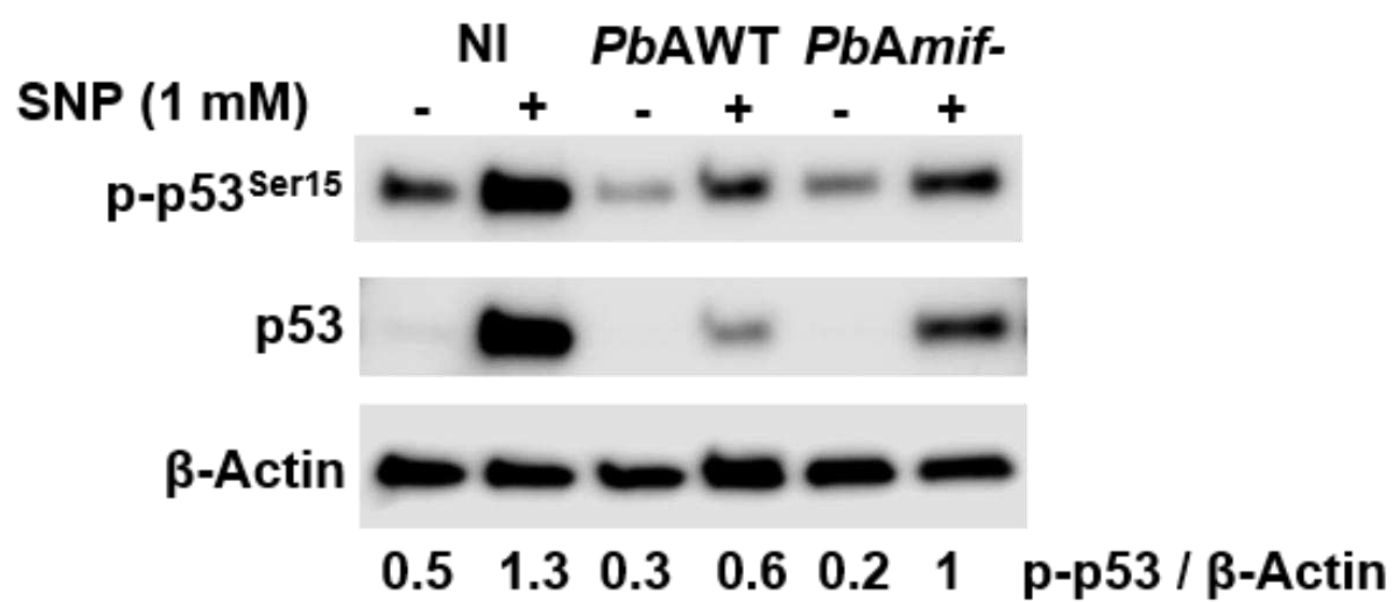



**Fig 2**

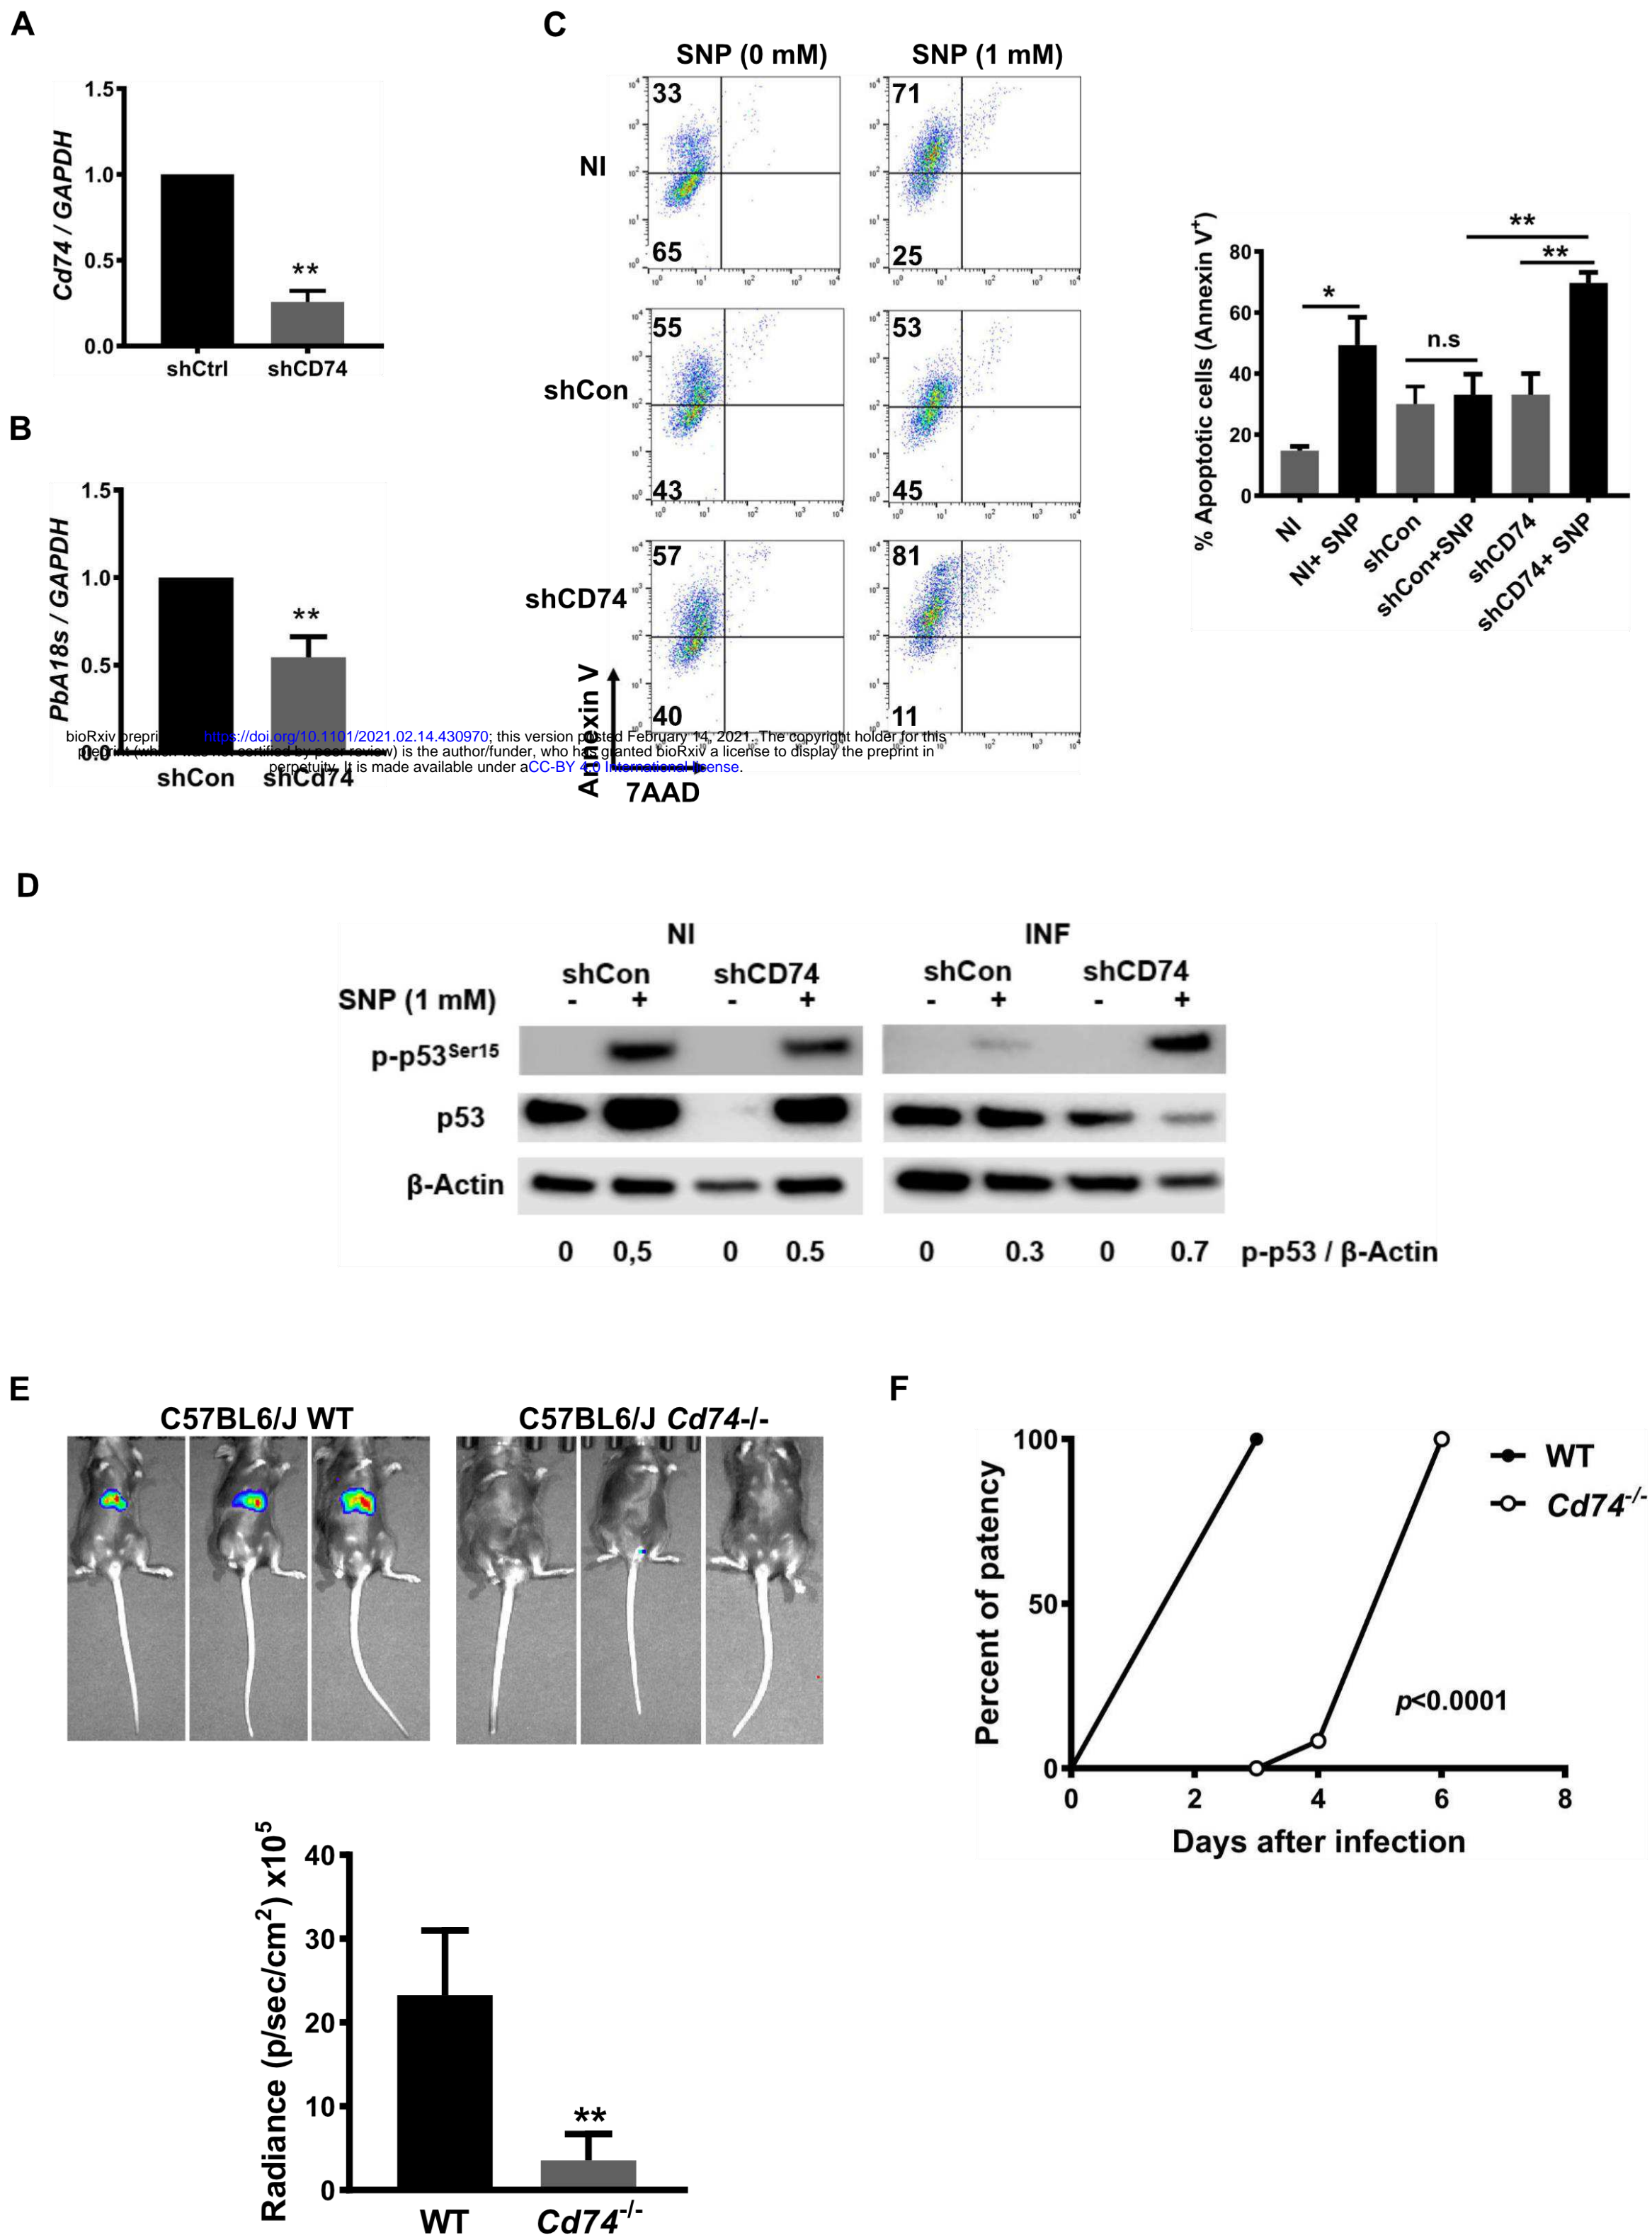

**Fig 3**

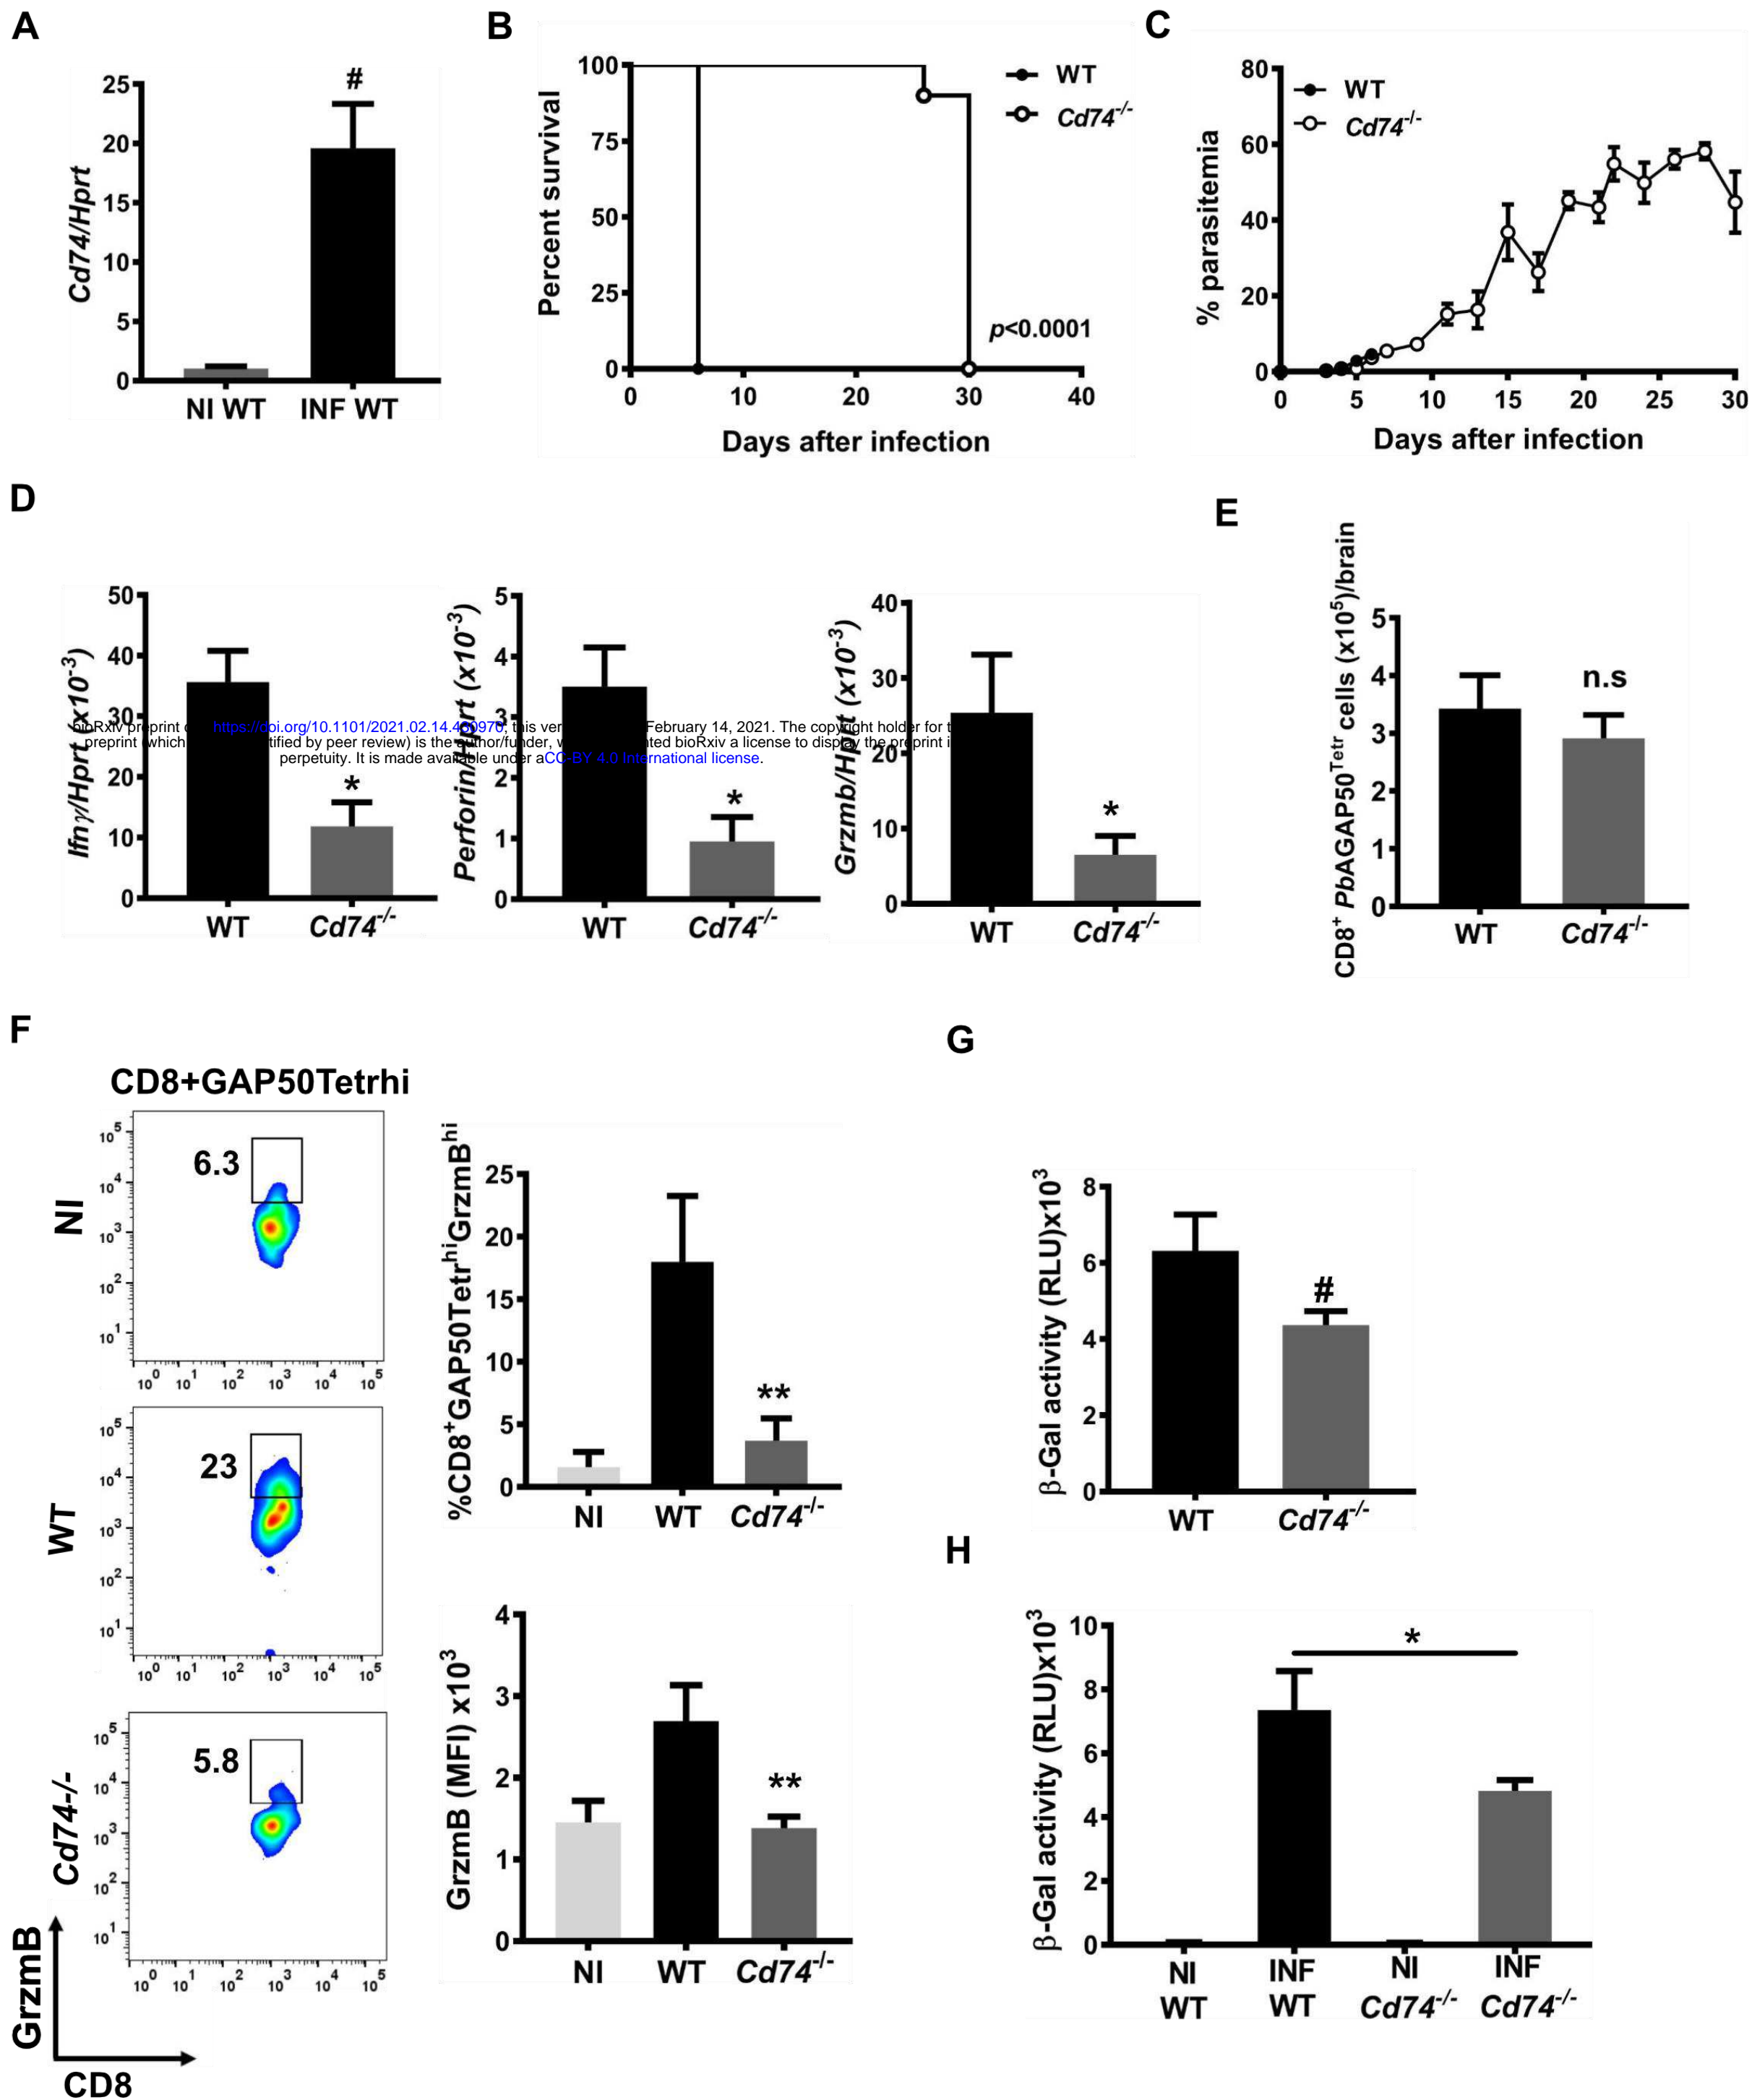

**Fig 4**

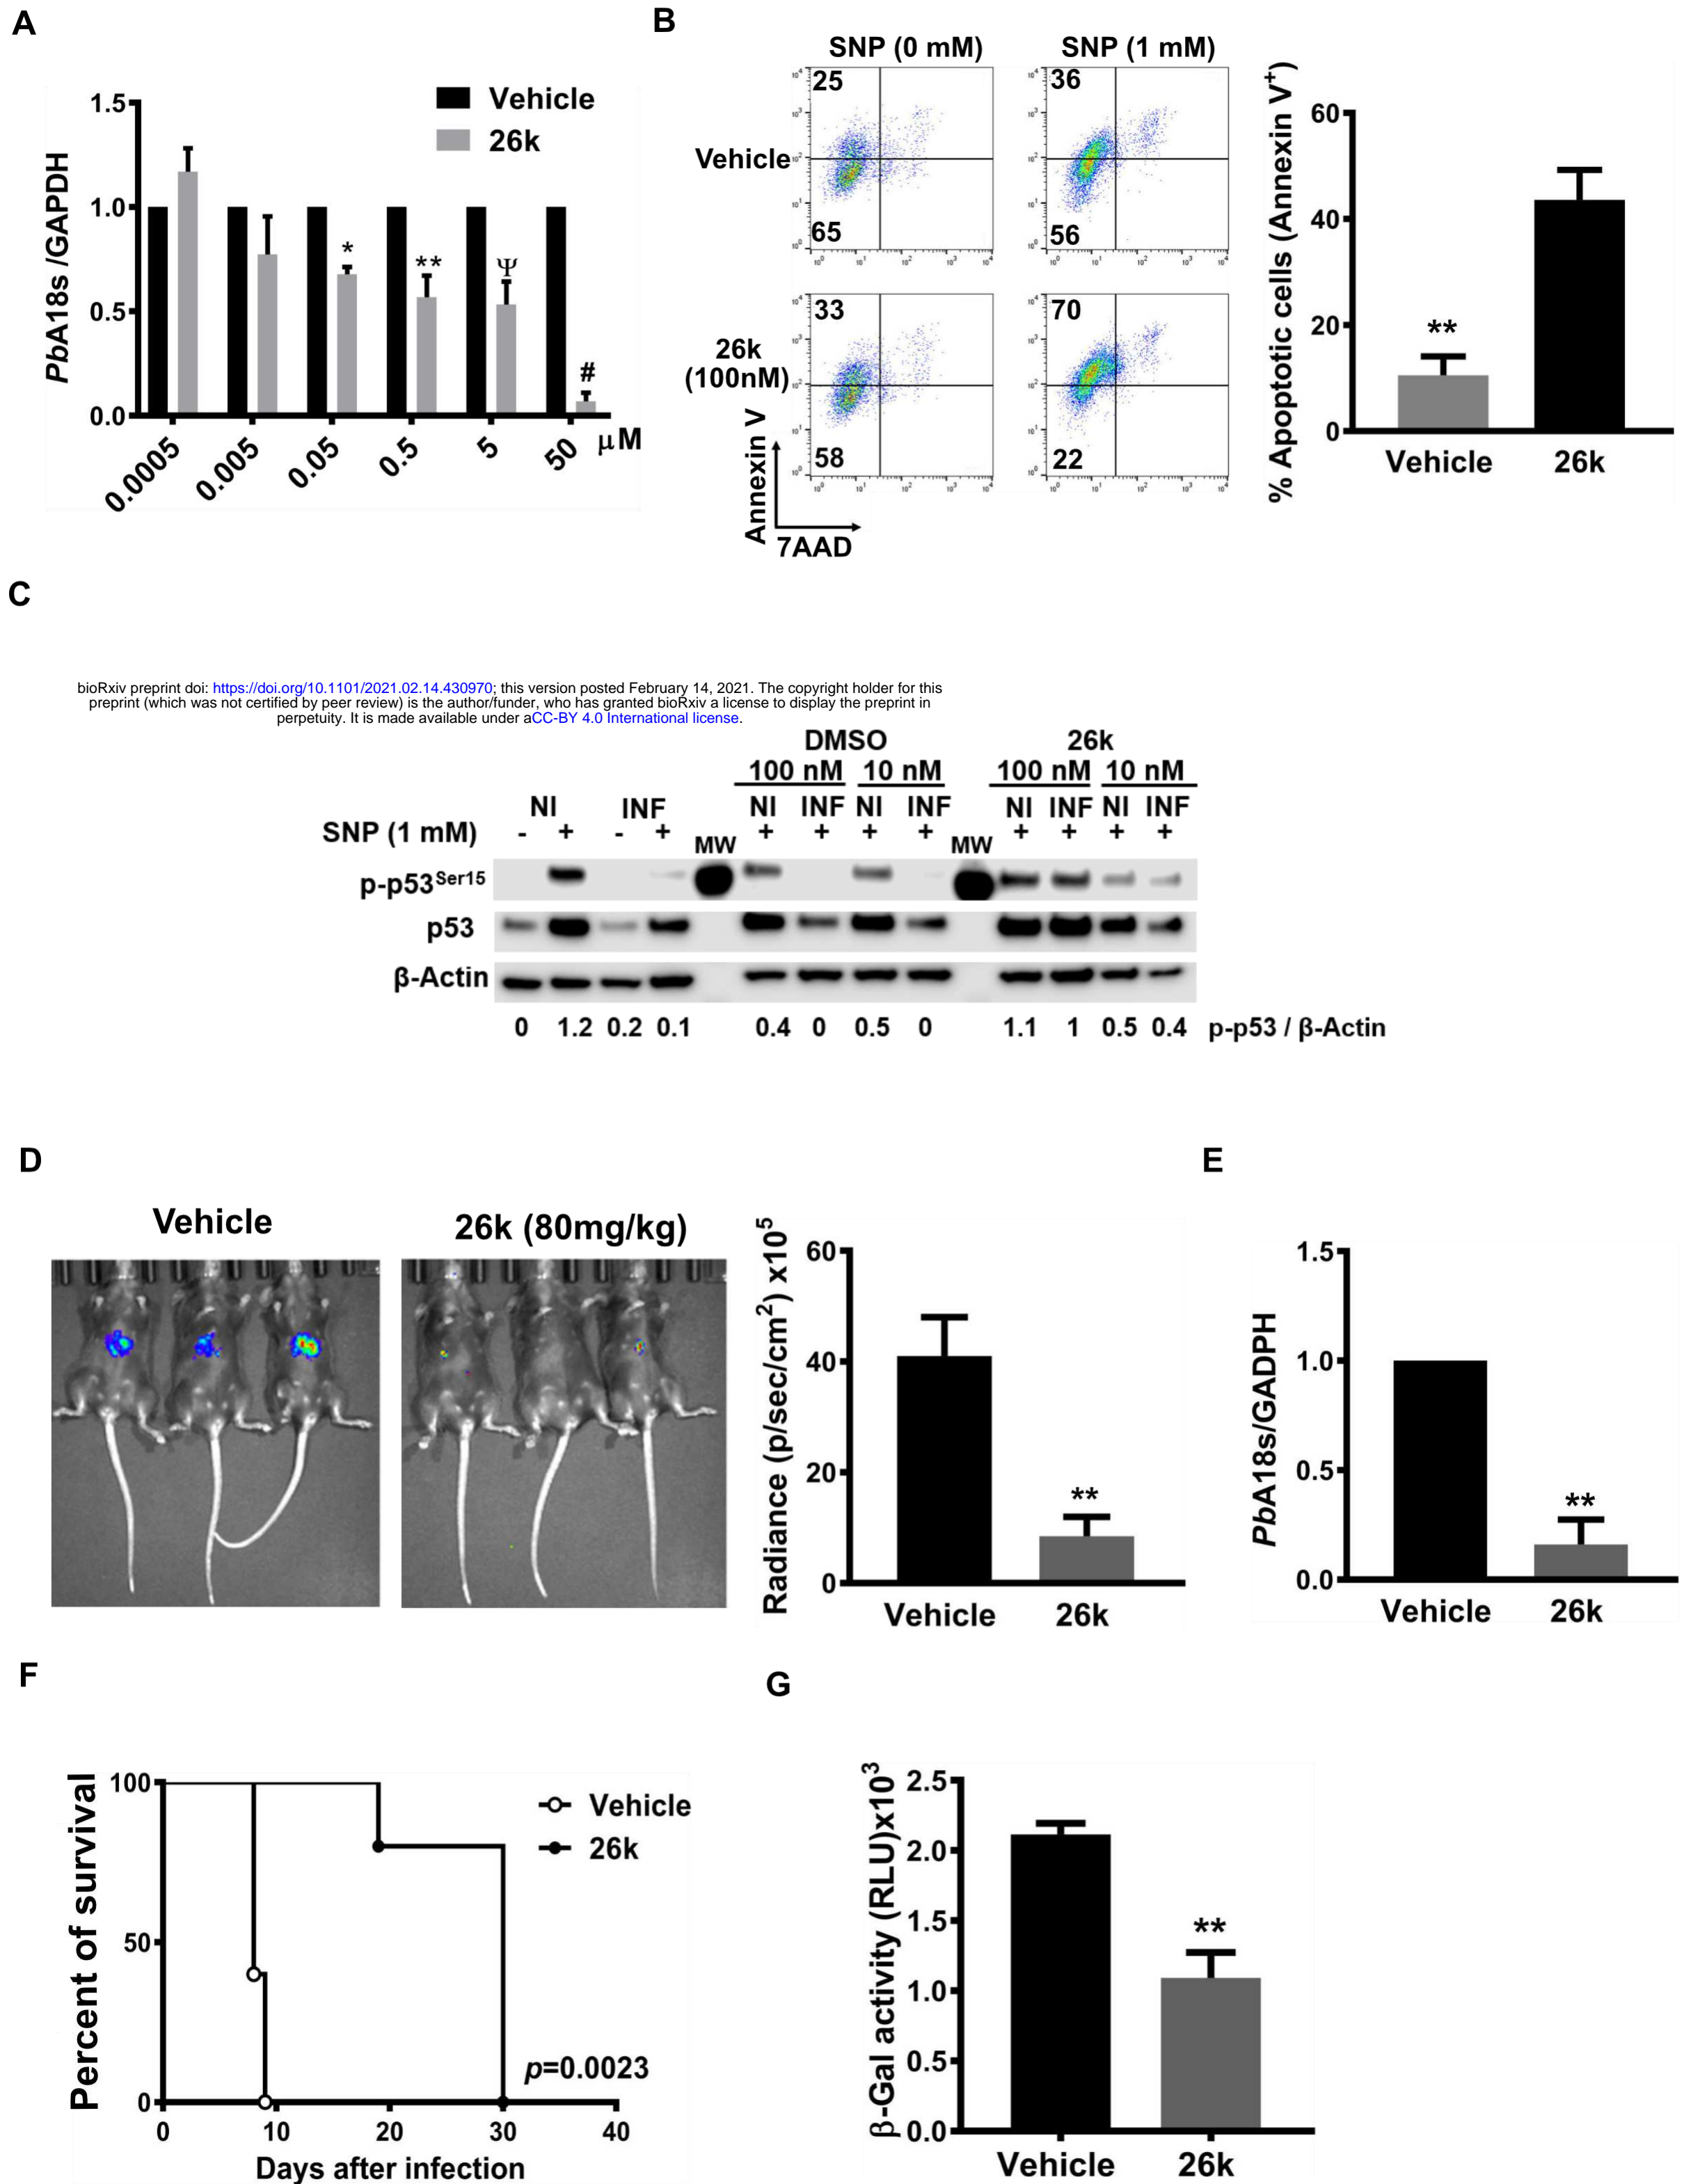

**Figure S1**

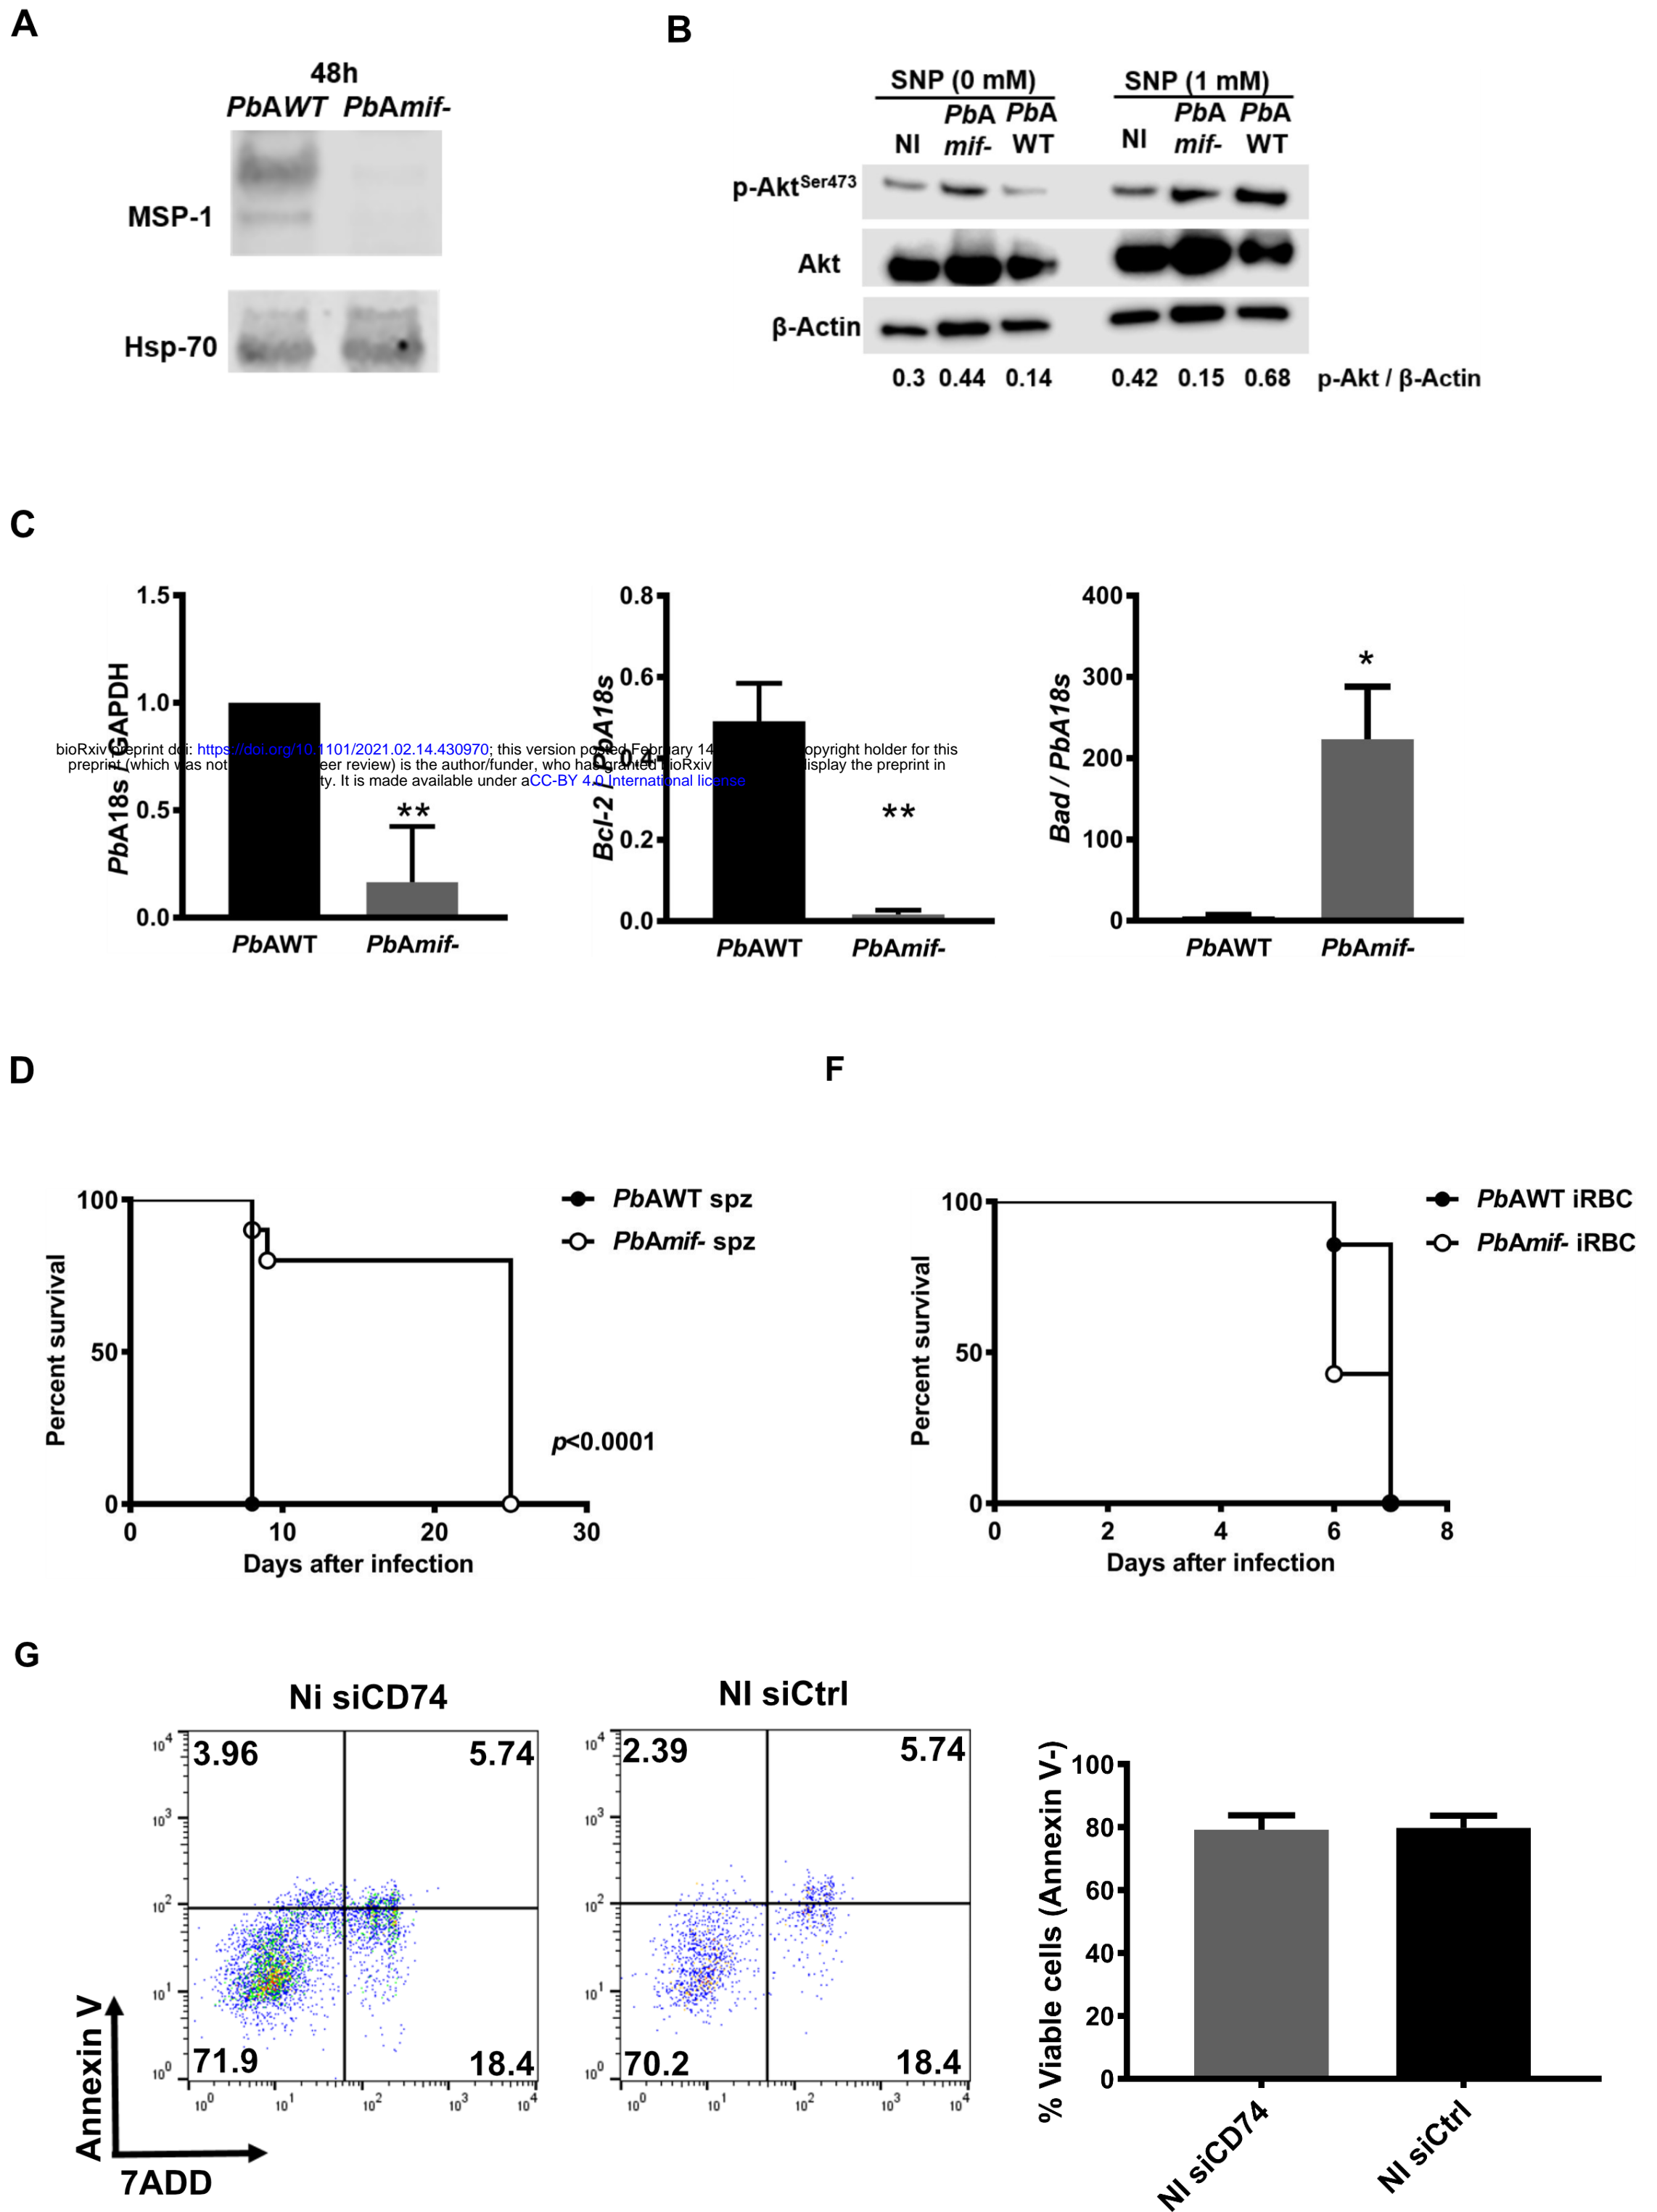

**Figure S2**

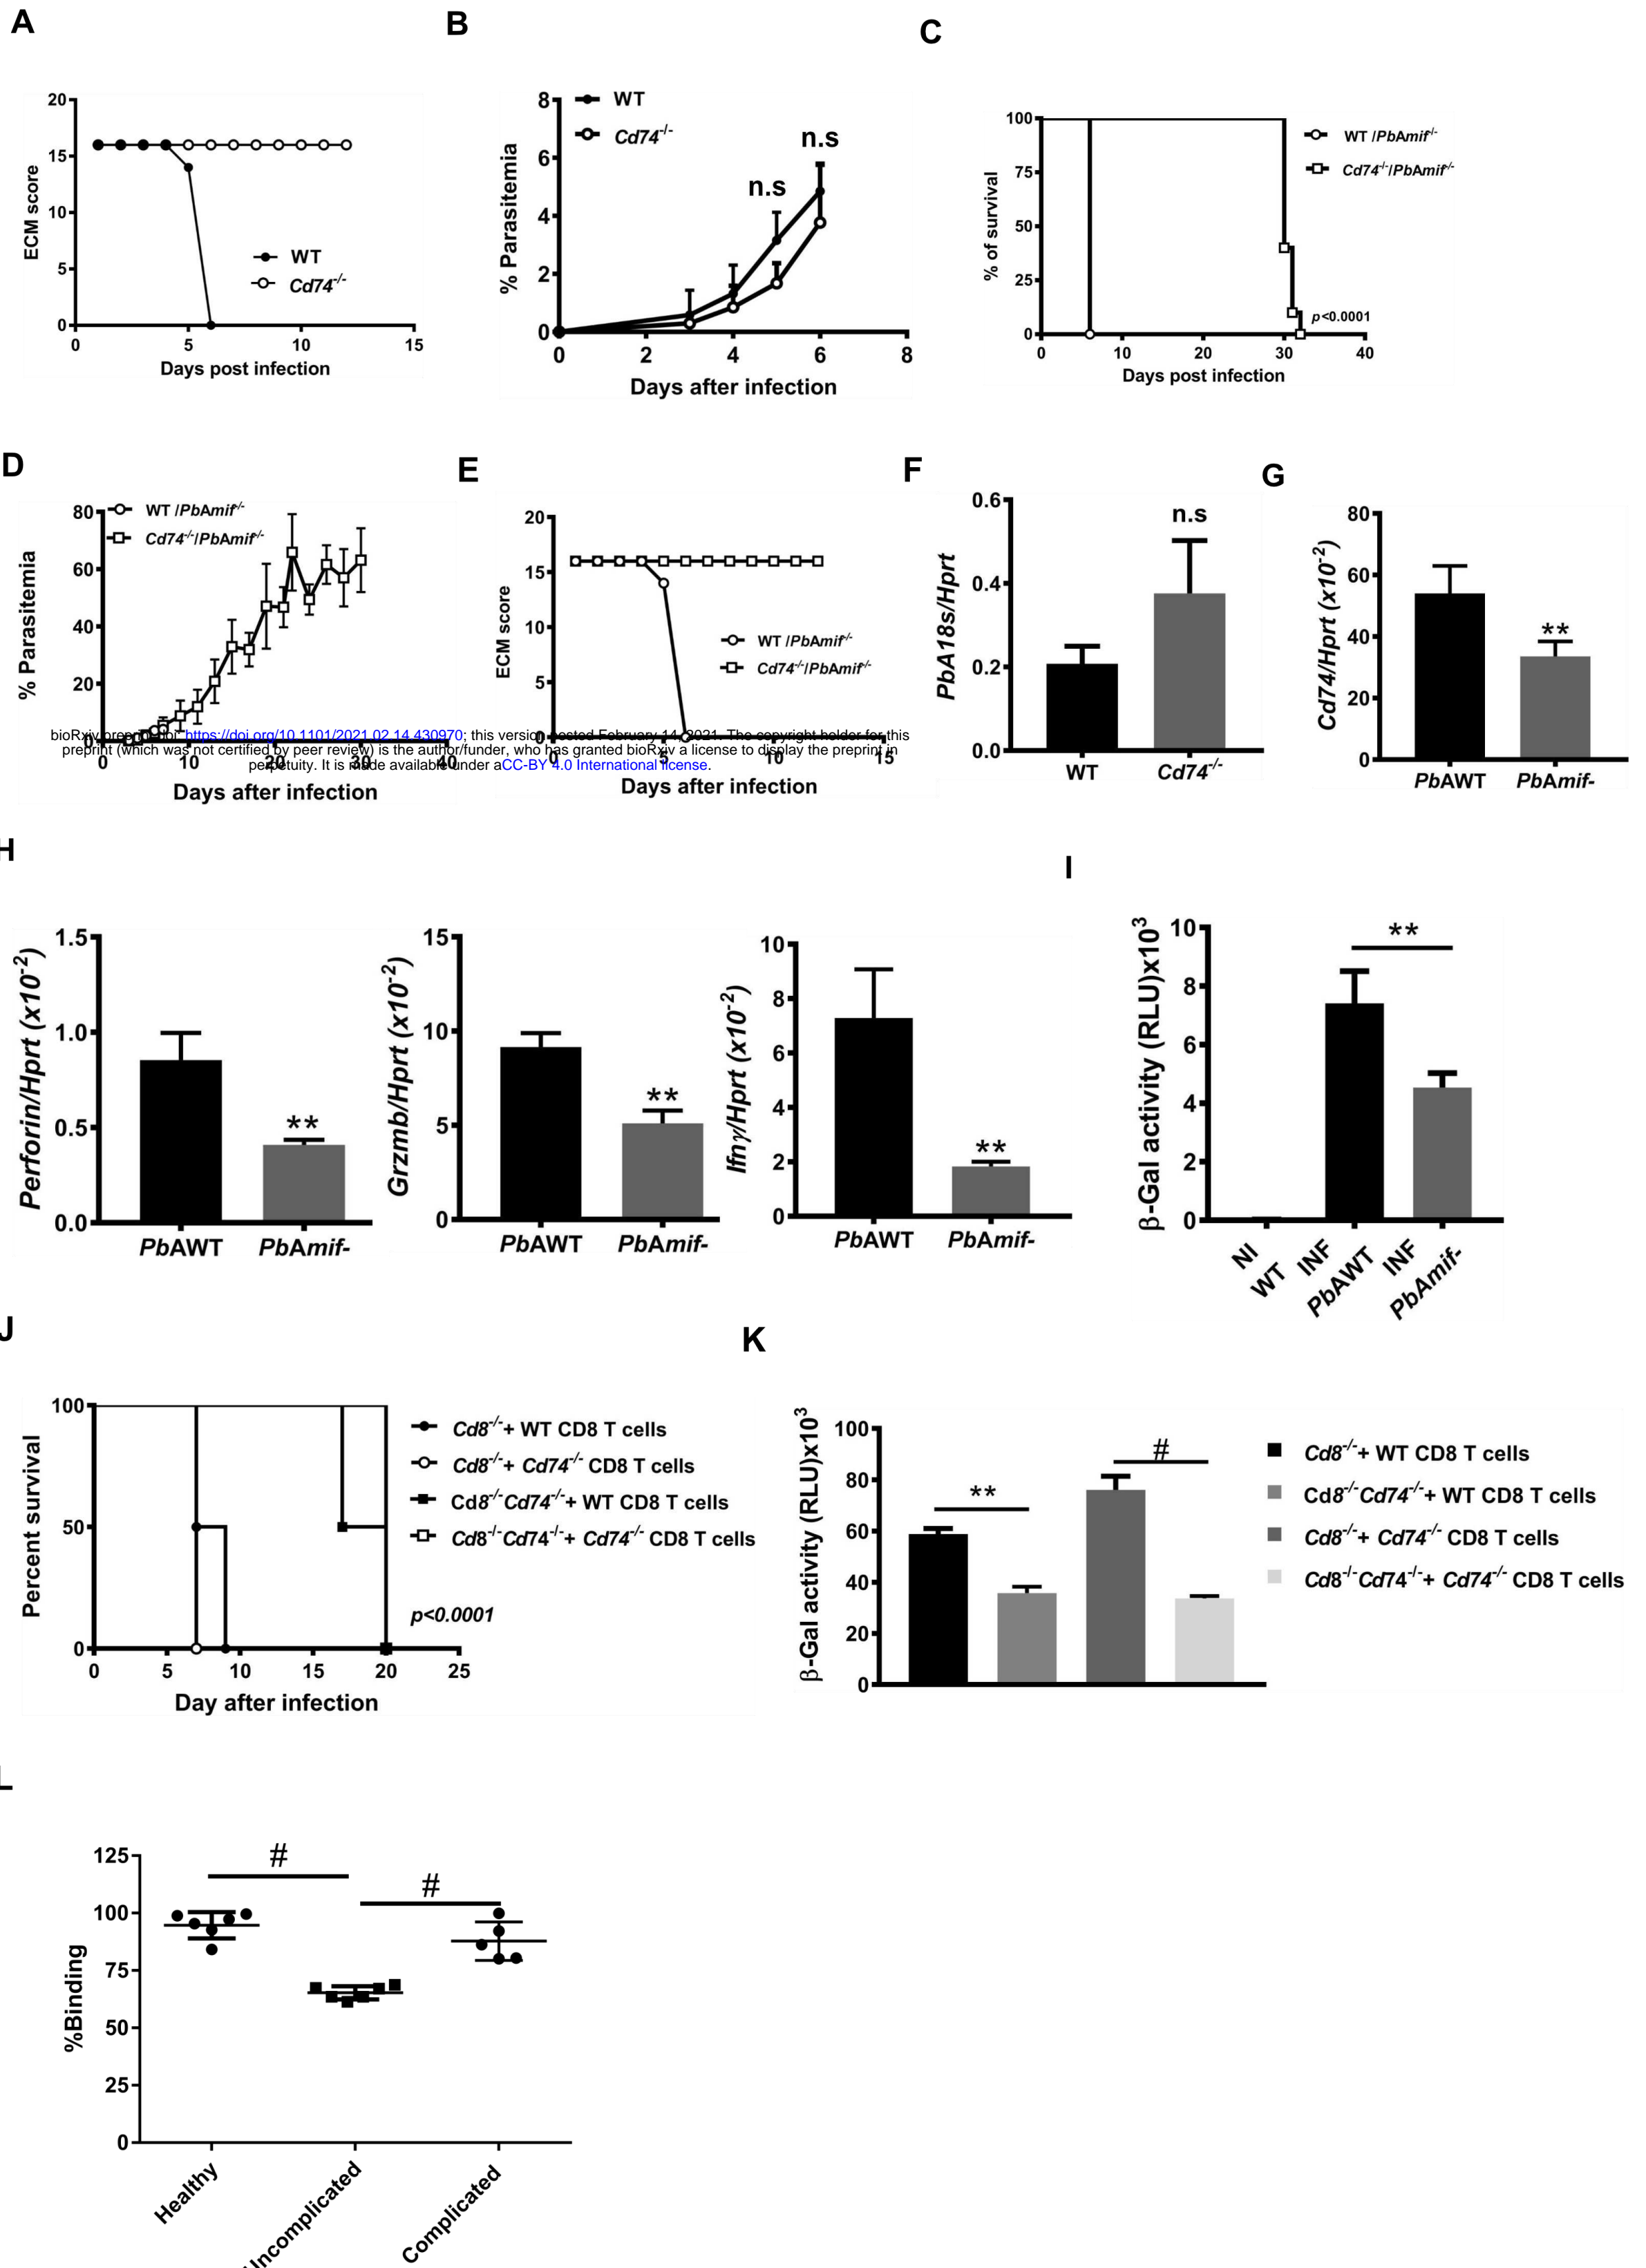

Figure S3

A

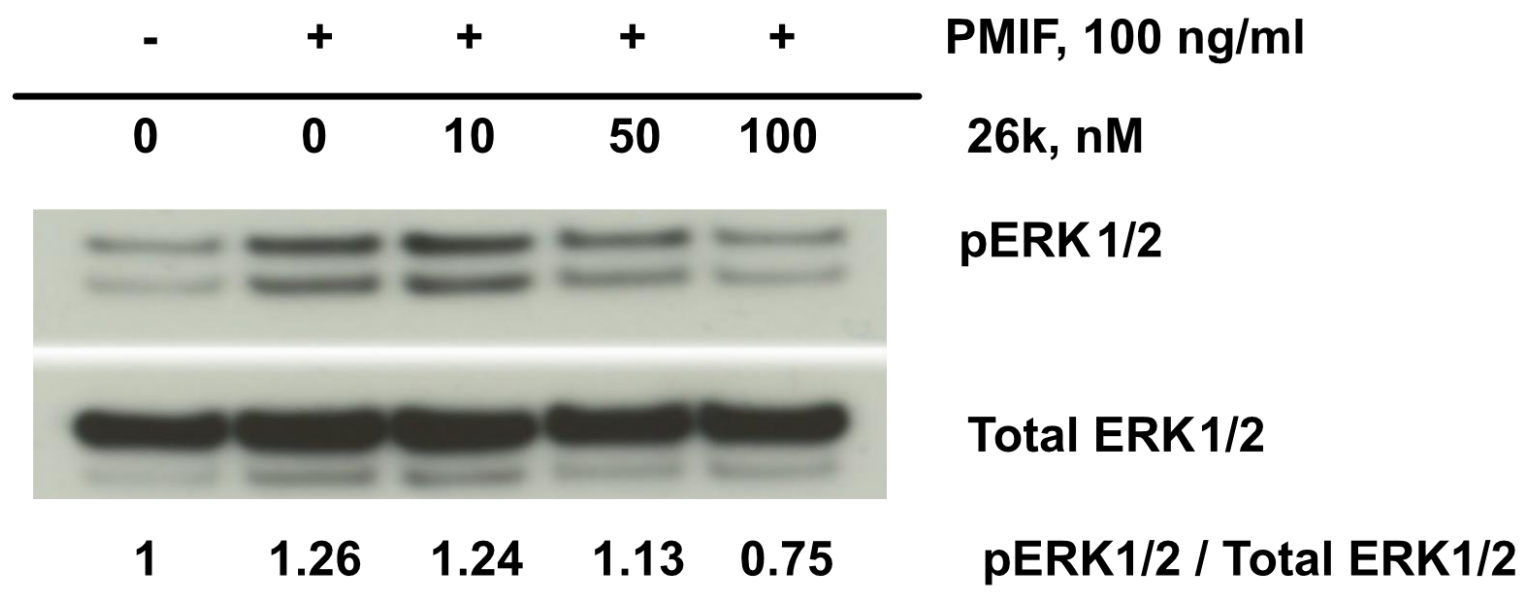

B

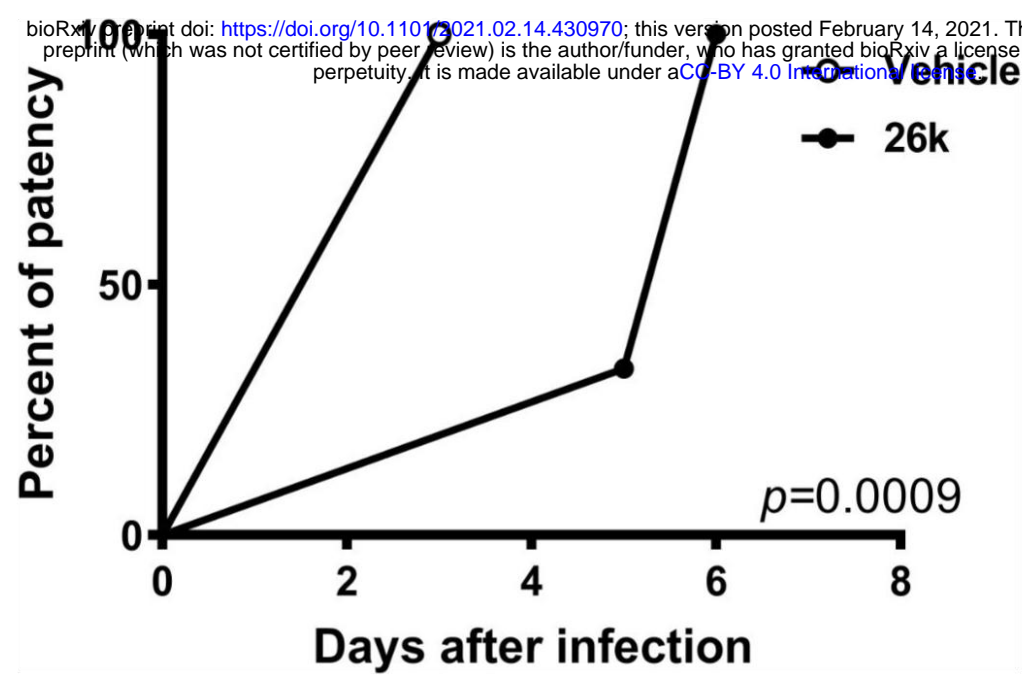

C

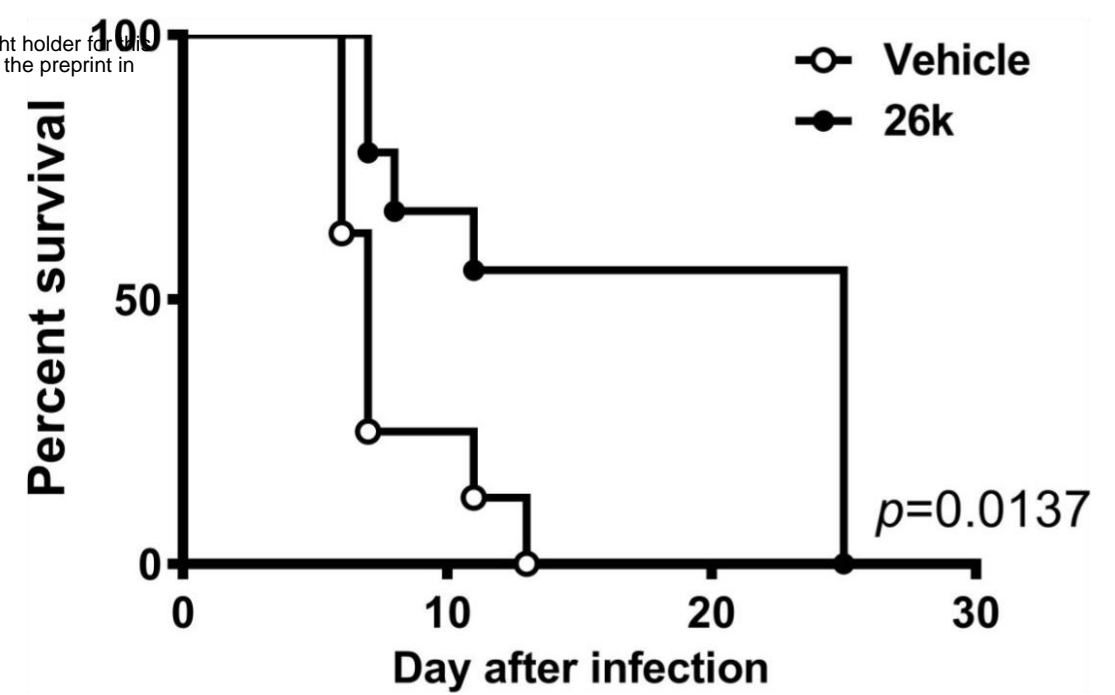

Source: https://www.biorxiv.org/content/10.1101/2021.02.14.430970v1.full.pdf
