1  
2  
3  
4  
5  
6  
7  
8  
9  
10  
11  
12  
13  
14  
15  
16  
17  
18  
19  
20  
21  
22  
23  
24  
25  
26  
27  
28  
29  
30  
31  
32  
33  
34  
35

### **Suppression of *Plasmodium* MIF-CD74 Signaling Protects Against Severe Malaria**

Alvaro Baeza Garcia<sup>1\*</sup>, Edwin Siu<sup>1</sup>, Xin Du<sup>1</sup>, Lin Leng<sup>1</sup>, Blandine Franke-Fayard<sup>3</sup>, Chris J Janse<sup>3</sup>, Shanshan W Howland<sup>4</sup>, Laurent Rénia<sup>4</sup>, Elias Lolis<sup>5</sup>, Richard Bucala<sup>1,2\*</sup>

#### **Affiliations:**

<sup>1</sup>Departments of Internal Medicine, <sup>2</sup>Pharmacology, Yale School of Medicine, and <sup>3</sup>Epidemiology of Microbial Diseases, Yale School of Public Health, New Haven, Connecticut 06520, USA. <sup>4</sup>Department of Parasitology, Leiden University Medical Center, Leiden, Netherlands, <sup>5</sup>Singapore Immunology Network, Agency for Science, Technology and Research (A\*STAR), Singapore, Singapore. <sup>5</sup>Department of Pharmacology, School of Medicine, Yale University, New Haven, CT, 06510, USA.

\*Correspondence to Richard Bucala, Department of Internal Medicine, Yale University School of Medicine P.O. Box 208031, 300 Cedar St., New Haven, Connecticut 06520-8031, USA. Telephone at (203) 785-2453. Fax at (203) 785-5415. Email at [richard.bucala@yale.edu](mailto:richard.bucala@yale.edu)

\*Correspondence to Alvaro Baeza Garcia. Email at [Alvaro.Baeza-Garcia@u-bourgogne.fr](mailto:Alvaro.Baeza-Garcia@u-bourgogne.fr)

36 **Abstract**

37 Malaria begins when mosquito-borne *Plasmodium* sporozoites invade hepatocytes and usurp  
38 host pathways to support the differentiation and multiplication of erythrocyte-infective  
39 merozoite progeny. The deadliest complication of infection, cerebral malaria, accounts for the  
40 majority of malarial fatalities. Although our understanding of the cellular and molecular  
41 mechanisms underlying the pathology remains incomplete, recent studies support the  
42 contribution of systemic and neuroinflammation as the cause of cerebral edema and blood-  
43 brain barrier (BBB) dysfunction. All *Plasmodium* species encode an orthologue of the innate  
44 cytokine, Macrophage Migration Inhibitory Factor (MIF), which functions in mammalian  
45 biology to regulate innate responses. *Plasmodium* MIF (PMIF) similarly signals through the  
46 host MIF receptor CD74, leading to an enhanced inflammatory response. We investigated the  
47 PMIF-CD74 interaction in the onset of experimental cerebral malaria (ECM) using CD74  
48 deficient (*Cd74*<sup>-/-</sup>) mice, which were found to be protected from ECM. The protection was  
49 associated with the inability of brain microvessels from *Cd74*<sup>-/-</sup> hosts to present parasite antigen  
50 to sequestered *Plasmodium*-specific CD8<sup>+</sup> T cells. Infection of mice with PMIF-deficient  
51 sporozoites (*PbAmif*<sup>-</sup>) also protected mice from ECM, highlighting the pivotal role of PMIF in  
52 the pre-erythrocytic stage of the infection. A novel pharmacologic PMIF-selective antagonist  
53 reduced PMIF/CD74 signaling and fully protected mice from ECM. These findings reveal a  
54 conserved mechanism for *Plasmodium* usurpation of host CD74 signaling and suggest a  
55 tractable approach for new pharmacologic intervention.

56

57

58

59

60

61

62

63

64

65

66

67

68

69

70

## 71 Introduction

72 Malaria caused by parasites of the genus *Plasmodium* is the most deadly parasitic  
73 disease, causing approximately half a million deaths annually [1]. *Plasmodium* sporozoites  
74 enter the skin through the bite of infected *Anopheles* mosquitoes and transit through the  
75 bloodstream to invade the liver. A single infected hepatocyte produces tens of thousands of  
76 erythrocyte-infectious merozoites and initiates the erythrocytic cycle of infection. The  
77 subsequent erythrocytic stage of infection produces the disease's clinical manifestations [2],  
78 including the most severe complication of *P. falciparum* infection: cerebral malaria leading to  
79 impaired consciousness, seizures, coma, and subsequent mortality [3]. The experimental  
80 cerebral malaria (ECM) animal model by infection of susceptible C57BL/6J mice with  
81 *Plasmodium berghei* ANKA (*PbA*) reproduces many of the neurological signs and pathologic  
82 changes of human cerebral malaria [4]. ECM is triggered by parasitized erythrocytes in the  
83 cerebral microvasculature leading to the production of inflammatory molecules such as IFN- $\gamma$ ,  
84 granzyme B, and perforin, and is associated with the recruitment and accumulation of effector  
85 CD8<sup>+</sup> T cells in the CNS [5, 6].

86 Both host and parasite factors contribute to the pre- and erythrocytic stages of infection  
87 and severe malaria development. *Plasmodium* parasites express intricate strategies to evade  
88 immune detection and destruction. It is noteworthy that all *Plasmodium* species analyzed  
89 genetically encode an orthologue of the mammalian cytokine macrophage migration inhibitory  
90 factor (MIF) [7, 8]. MIF sustains activation responses by promoting innate cell survival, which  
91 occurs by signaling through its cognate receptor CD74, leading to sustained ERK1/2 activation  
92 and reducing cellular p53 activity [9, 10, 11]. *Plasmodium* MIF (PMIF) is highly conserved in  
93 all known *Plasmodium* genomes; for instance, only a single amino acid distinguishes murine  
94 *Plasmodium berghei* from human *P. falciparum* PMIF [7, 8]. Recent evidence has implicated  
95 PMIF in the growth and development of liver-stage parasites [12, 13], and PMIF binds with  
96 high affinity to the host receptor CD74 [14, 15], which has been independently identified as a  
97 susceptibility factor for murine *Plasmodium* infection [16].

98 In the present study, we show that *PbA* infected *Cd74*<sup>-/-</sup> mice are resistant to ECM.  
99 Cerebral malaria onset further relies on the contribution of endothelial cell CD74, which is  
100 upregulated in the brains of infected mice in the presence of PMIF to promote parasite antigen  
101 presentation to brain-sequestered *Plasmodium*-specific CD8<sup>+</sup> T cells. Mice infected with  
102 *PbAmif*<sup>-</sup> parasites were only resistant to ECM when infected with sporozoites, reinforcing the  
103 idea that liver-stage *Plasmodium* infection is critical for ECM development [17]. In agreement

104 with prior studies [12, 13], our data also support a central role for PMIF in *Plasmodium* liver  
105 infection. PMIF activates the hepatocellular host MIF receptor CD74 to inhibit the apoptosis  
106 of infected hepatocytes, thus promoting *Plasmodium* development and replication. These  
107 findings were recapitulated by pharmacologic inhibition of the PMIF/CD74 interaction with a  
108 novel, PMIF-selective small molecule antagonist [18, 19] that reduced the survival of infected  
109 cells, decreased liver-stage parasite burden, and fully protected mice from acute cerebral  
110 malaria.

## 111 **Results**

### 112 **CD74 is overexpressed in the brain of *PbA* infected mice and contributes to ECM** 113 **development.**

114 We recently demonstrated that PMIF exerts its proinflammatory effects by signaling  
115 through the host receptor CD74 [20]. To examine the potential role of CD74 in the pathogenesis  
116 of ECM, we measured the expression of CD74 in *PbA*-infected mouse brains during ECM and  
117 observed an increase in *Cd74* mRNA expression compared with uninfected mice (**Figure 1A**).  
118 We next challenged WT and *Cd74*<sup>-/-</sup> mice with *PbAWT* iRBCs and assessed ECM  
119 development. While 100% of the WT mice exhibited neurological symptoms within 7-8 days  
120 after infection, *PbA*-infected *Cd74*<sup>-/-</sup> mice were fully protected from ECM and succumbed to  
121 hyperparasitemia only 30 days after infection (**Figure 1B, C and S1A**). Moreover, we found  
122 no significant differences in parasitemia between *PbAWT*-infected WT or *Cd74*<sup>-/-</sup> mice during  
123 the asymptomatic blood-stage, suggesting that *Cd74* deficiency does not affect parasite  
124 replication in the erythrocyte (**Figure S1B**). The same results were observed in *Cd74*<sup>-/-</sup> mice  
125 infected with *PbAmif*- parasites (**Figures S1C, D, and E**). The protection of *Cd74*<sup>-/-</sup> mice was  
126 associated with the downregulation of IFN- $\gamma$ , perforin, and granzyme B expression in the brains  
127 of *Cd74*<sup>-/-</sup> versus WT mice but without an appreciable difference in the quantity of brain  
128 sequestered parasites (**Figure 1D and S1F**).

129 CD8<sup>+</sup> T cells are essential for ECM development and contribute directly to human  
130 cerebral malaria [4] and ECM pathology [21]. Thus, we investigated if CD8<sup>+</sup> T cells from  
131 *Cd74*<sup>-/-</sup> mice have an impaired response to *PbA* infection. We measured the amount of brain  
132 sequestered CD8<sup>+</sup> T cells responding to *PbA* by using a T cell receptor tetramer specific to the  
133 *PbAGAP50* antigen [22]. Notably, the amount of brain-sequestered *PbAGAP50*-specific  
134 CD8<sup>+</sup> T cells was not significantly different between WT and *Cd74*<sup>-/-</sup> mice (**Figure 1E**),  
135 indicating that *Cd74*<sup>-/-</sup> mice can mount a *PbA* responsive CD8<sup>+</sup> T cells response in the brain.  
136 Nevertheless, in *Cd74*<sup>-/-</sup> mice, CD8 T cell effector functions were strongly suppressed, as

137 indicated by the reduced frequency of *Pb*GAP50-specific CD8<sup>+</sup> T cells expressing the ECM-  
138 associated inflammatory molecule Granzyme B (**Figure 1F**). Our findings suggest that *Pb*A  
139 responsive CD8<sup>+</sup> T cells from *Cd74*<sup>-/-</sup> mice undergo priming and trafficking to the brain during  
140 *Pb*A blood-stage infection but do not express the inflammatory effector response associated  
141 with the development of ECM. We therefore examined if a dysfunctional cytotoxic response  
142 in *Cd74* deficient CD8<sup>+</sup> T cells reduced ECM symptoms. For this, we adoptively transferred  
143 CD8<sup>+</sup> T cells from WT or *Cd74*<sup>-/-</sup> *Pb*A-infected mice into naïve *Cd8*<sup>-/-</sup> or *Cd8*<sup>-/-</sup>*Cd74*<sup>-/-</sup> recipient  
144 mice and infected them with *Pb*A-infected red blood cells (iRBCs) three days later. Recipient  
145 *Cd8*<sup>-/-</sup> mice that received WT or *Cd74*<sup>-/-</sup> CD8<sup>+</sup> T cells from *Pb*A-infected mice showed signs of  
146 ECM and succumbed by day 10, whereas recipient *Cd8*<sup>-/-</sup> *Cd74*<sup>-/-</sup> mice receiving WT or *Cd74*<sup>-/-</sup>  
147 CD8<sup>+</sup> T cells from *Pb*AWT infected mice did not show ECM symptoms and succumbed by  
148 20 days after infection (**Figure 1G**). Together, these data support the conclusion that CD8<sup>+</sup> T  
149 cells from *Cd74*<sup>-/-</sup> mice are primed by *Pb*A antigens but are unable to induce ECM, supporting  
150 the role of brain expressed CD74 in the development of ECM pathology.

151

### 152 **Cross-presentation of *Plasmodium* antigen by brain endothelium is CD74 dependent.**

153 Brain vascular endothelium becomes activated during malaria infection with the ability  
154 to process and cross-present *Plasmodium* antigens [22], thereby contributing to the T cell  
155 effector response and inflammation that underlies ECM [21]. In addition to the role of CD74  
156 as the cognate MIF receptor [10], it functions intracellularly as the MHC class II invariant chain  
157 [23] and has been implicated in an MHC class I cross-presentation pathway for cytolytic T  
158 lymphocytes (CTL) [24]. We hypothesized that CD74 expressed by activated brain  
159 endothelium may cross-present *Pb*A antigens to prime infiltrating CD8<sup>+</sup> T cells. Accordingly,  
160 we assessed the ability of *Pb*A antigen-pulsed, brain-derived endothelium to activate T cells  
161 by employing the LR-BSL8.4a reporter T cell line that expresses LacZ in response to the *Pb*A-  
162 GAP50 epitope [6]. *Cd74*<sup>-/-</sup> brain-derived endothelial cells were less able to activate LR-  
163 BSL8.4a T cells in the presence of *Pb*A antigens when compared to WT brain-derived  
164 endothelial cells (**Figure 2A**). We confirmed these results by isolating brain microvessels from  
165 *Pb*A-infected WT and *Cd74*<sup>-/-</sup> mice at the time of ECM development and incubating them with  
166 LR-BSL8.4a reporter T cells for measurement of LacZ expression. Microvessels from *Pb*A-  
167 infected WT mice showed a greater ability to cross-present *Pb*A antigens than microvessels  
168 from *Cd74*<sup>-/-</sup> mice (**Figure 2B**). We next assessed cross-presentation of *Pb*A antigens *ex vivo*  
169 by using brain microvessels from *Cd8*<sup>-/-</sup> or *Cd8*<sup>-/-</sup>*Cd74*<sup>-/-</sup> mice infected with *Pb*A after adoptive  
170 transfer with CD8<sup>+</sup> T cells from WT or *Cd74*<sup>-/-</sup> mice. The microvessels from recipient *Cd8*<sup>-/-</sup>

171 mice receiving WT or *Cd74*<sup>-/-</sup> CD8<sup>+</sup> T cells from *PbA* infected mice had a greater ability to  
172 cross-present *PbA* antigens (**Figure 2C**). Together, these results indicate that CD74 expression  
173 by brain endothelial cells contributes to cross-presentation of *PbA* antigens to CD8<sup>+</sup> T cells  
174 and to ECM development.

175

### 176 **PMIF contributes to the development of ECM by promoting *PbA* liver stage development.**

177 Precedent studies have shown that *PbA* parasites genetically deficient in PMIF  
178 (*PbAmif*<sup>-</sup>) develop normally in their mosquito hosts and during blood-stage infection [14]. To  
179 examine the contribution of PMIF to the development of ECM, we infected C57BL6/J mice  
180 with wild-type *PbA* (*PbAWT*) or *PbAmif*<sup>-</sup> iRBC. There was no difference in ECM  
181 manifestations, and all the mice succumbed by day seven after infection (**Figure 3A**). Recent  
182 studies have shown that liver-stage *Plasmodium* infection is critical for ECM development  
183 [17]. We and others recently demonstrated that PMIF is necessary for efficient *Plasmodium*  
184 liver-stage development of the parasite and that its absence impairs blood-stage patency [12,  
185 13]. Accordingly, mice infected with *PbAmif*<sup>-</sup> sporozoites did not exhibit ECM signs and  
186 survived until day 25 when compared with mice infected with *PbAWT* sporozoites; the later  
187 mice exhibited neurological symptoms followed by mortality 8-9 days after infection (**Figure**  
188 **3B**). We measured the expression of CD74 in the brain of infected mice during ECM and  
189 observed an increase in *Cd74* mRNA expression in the brains of *PbAWT* infected mice when  
190 compared with brains of *PbAmif*<sup>-</sup> infected mice (**Figure 3C**). The expression of the  
191 inflammatory molecules IFN- $\gamma$ , perforin, and granzyme B in the brains of mice infected with  
192 *PbAWT* sporozoites also was higher than in mice infected with *PbAmif*<sup>-</sup> sporozoites (**Figure**  
193 **3D**).

194 To evaluate the contribution of the PMIF/CD74 interaction to *Plasmodium* antigen  
195 cross-presentation and ECM development, we infected WT mice with *PbAWT* or *PbAmif*<sup>-</sup>  
196 sporozoites isolated the brain microvessels at the time of ECM onset, and we incubated them  
197 with LR-BSL8.4a reporter T cells. We observed that microvessels from *PbAWT* infected mice  
198 exhibited a greater ability to cross-present *PbA* antigens than microvessels from *PbAmif*<sup>-</sup>  
199 infected mice (**Figure 3E**). Together, these data confirm the role of PMIF in liver-stage  
200 *Plasmodium* infection and the subsequent promotion of inflammation during blood-stage  
201 infection and ECM development.

202

203

204 **PMIF promotes *Plasmodium*-infected hepatocyte survival and p53 inhibition through**  
205 **host CD74.**

206 Prior studies of *Plasmodium*-infected liver cells have implicated pro-survival roles  
207 for hepatocyte growth factor signaling [25, 26] and inhibition of the tumor suppressor p53,  
208 which is activated by cellular stress to initiate programmed cell death [27]. Mammalian and  
209 parasite MIF molecules promote monocyte survival by increasing p53 phosphorylation at Ser<sup>15</sup>  
210 [9, 11]. Our results suggest that PMIF regulates *PbA* liver-stage development and promotes  
211 the development of ECM. We observed that intracellular parasite content was reduced in  
212 HepG2 cells infected with *PbAmif*- sporozoites when compared with *PbAWT* sporozoites  
213 (**Figure 4A**). We used circumsporozoite (CSP) and merozoite surface protein-1 (MSP-1) as  
214 indicators of parasite maturation [28]. While CSP was expressed in similar levels (**Figure**  
215 **S2A**), there was reduced expression of MSP-1 in the HepG2 cells infected with *PbAmif*-  
216 parasites, suggesting that PMIF is not necessary for hepatocyte infection but may have a  
217 permissive role in pre-erythrocytic parasite development (**Fig S2B**). To assess the mechanistic  
218 role of PMIF in liver-stage parasite development, we examined its effect on the survival of  
219 infected liver cells by treating infected HepG2 cells with the nitric oxide (NO) donor sodium  
220 nitroprusside (SNP) to induce p53 accumulation and apoptosis. We found that HepG2 cells  
221 infected with *PbAmif*- sporozoites were significantly more susceptible to NO-induced  
222 apoptosis than cells cultured with *PbAWT* parasites, despite a reduced infection level  
223 compared with *PbAWT* sporozoites (**Figure 4B**). The protection from apoptosis observed in  
224 *PbAWT* infected HepG2 cells was associated with decreased phospho-p53<sup>Ser15</sup> and intracellular  
225 p53 content compared with *PbAmif*- infected cells (**Figure 4C**). Induction of apoptosis in  
226 *PbAmif*- versus *PbAWT* infected cells also was associated with increased Akt phosphorylation  
227 (**Figure S2C**). We confirmed these *in vitro* findings by infecting mice with *PbAWT* or  
228 *PbAmif*- sporozoites. The livers of *PbAmif*- infected mice showed an 80% reduction in parasite  
229 burden compared with the livers of *PbAWT* infected mice, and this was associated with an  
230 attendant decrease in expression of the host pro-survival gene *Bcl-2* and an increase in the  
231 expression of the pro-apoptotic gene *Bad* (**Figure S2D**).

232 We next confirmed the direct role of PMIF signaling through the host MIF receptor by  
233 studying sporozoite infection in HepG2 cells after knockdown of CD74 (**Figure S2E**). HepG2  
234 cells treated with shCD74 to reduce CD74 expression had decreased parasite burden compared  
235 with treatment with a non-relevant shRNA (shCon) (**Figure 4D**). As expected, *PbAWT*  
236 infected shCD74-treated cells were more susceptible to apoptosis than infected shCon-treated  
237 cells (**Figure 4E**). Apoptosis induction also was associated with increased cellular p53<sup>Ser15</sup> and

238 p53 accumulation in the infected HepG2 cells with reduced CD74 expression (**Figure 4F**).  
239 Infection of mice genetically deficient in CD74 (*Cd74<sup>-/-</sup>*) with *Pb*AWT sporozoites revealed a  
240 significant reduction in liver burden of *Plasmodium* parasites when compared to WT (*Cd74<sup>+/+</sup>*)  
241 mice (**Figure 4G**), and this reduction was associated with a delay in blood-stage patency from  
242 2 to 6 days post-infection (**Figure S2F**). These results support the essential role of CD74 in  
243 mediating PMIF action and promoting *Plasmodium* pre-erythrocytic development leading to  
244 blood-stage infection.

#### 245 **Pharmacologic PMIF antagonism reduces *PbA* infection and protects against cerebral** 246 **malaria.**

247 Our experimental results support a central role in malaria infection for host CD74 and  
248 its activation by PMIF to promote the survival of infected hepatocytes, leading to inflammatory  
249 blood-stage infection and subsequent ECM pathophysiology. Anti-PMIF antibodies have been  
250 reported in malaria patients [29] and we assessed the ability of malaria infected sera to interfere  
251 with PMIF binding to CD74 using an established ELISA employing the recombinant CD74  
252 ectodomain [19, 30]. Such sera inhibited PMIF binding to CD74 when compared to sera from  
253 uninfected healthy controls (**Figure 5A**). Moreover, sera from patients with clinically  
254 uncomplicated malaria were more effective in reducing PMIF/CD74 interaction than sera from  
255 those with complicated malaria (*e.g.*, severe anemia, cerebral malaria [15]), suggesting that a  
256 more effective anti-PMIF serologic response may be associated with reduced inflammatory  
257 sequelae during infection.

258 Small molecule MIF inhibitors have been developed and are in clinical evaluation [31,  
259 32]. We recently identified a small molecule PMIF antagonist, termed 26k, that shows a 2500-  
260 fold greater selectivity for PMIF than for host MIF ( $K_i = 40$  nM for PMIF versus  $K_i > 100$   $\mu$ M  
261 for MIF) [18] [19] and blocks downstream ERK1/2 MAPK signaling (**Figure S3A**). We  
262 treated *PbA* sporozoite infected HepG2 cells with 26k *in vitro* and measured parasite content  
263 by expression of *PbA*18s RNA together with sensitivity to apoptosis induction. Parasite burden  
264 decreased in the cells treated with 26k compared with vehicle (**Figure S3B**). Hepatocytes  
265 infected with *PbA* and treated with 26k also were more susceptible to apoptosis, as evidenced  
266 by Annexin V staining (**Figure 5B**). Moreover, 26k-treated cells showed increased p53  
267 phosphorylation and intracellular accumulation, a known consequence of CD74 blockade  
268 (**Figure 5C**) [9].

269 To determine the potential *in vivo* action of 26k, we treated C57BL/6J mice with 26k  
270 before infection with  $2 \times 10^3$  *PbA* sporozoites and then continued treatment once daily for 2



271 days. We assessed liver-stage infection, blood-stage patency, and the development of ECM and  
272 lethality. Treatment with 26k markedly decreased parasite burden in the liver at 48 h after  
273 infection when compared with vehicle controls (**Figure 5D and E**). Sporozoite infection led to  
274 blood-stage patency after 3 days in vehicle-treated mice but not until day 5 in the 26k treated  
275 group (**Figure S3C**). All vehicle-treated mice developed ECM symptoms (head deviation,  
276 ataxia, and paraplegia) 8 days after sporozoite infection, and all mice succumbed to cerebral  
277 malaria by days 9-10. By contrast, all mice treated with 26k were spared from cerebral malaria  
278 symptoms and did not succumb until after day 20 (**Figure 5F**, and S3D). We also examined  
279 the impact of 26k on *Plasmodium* antigen cross-presentation by brain microvascular  
280 endothelial cells. Brain microvessels from *PbA* infected WT mice were isolated at the time of  
281 ECM and treated *in vitro* with 26k (or vehicle) together with LR-BSL8.4a reporter T cells.  
282 Microvessels treated with 26k showed a reduction in *PbA* antigen cross-presentation as  
283 quantified by LacZ expression (**Figure 5G**). We also examined if 26k administration *in vivo*  
284 prevented ECM when mice were inoculated directly with iRBCs. We observed only partial  
285 protection from ECM in mice treated with 26k in this model (**Figure S3E**).

286 Taken together, these results support the conclusion that pharmacologic inhibition of  
287 the PMIF/CD74 interaction may be a promising approach to protect from liver infection and,  
288 consequently, ECM.

289

## 290 **Discussion**

291 *Plasmodium* parasites have evolved highly specialized invasion strategies that function  
292 to evade immune destruction, sustain infection, and ensure completion of their life cycle. Our  
293 study highlights the importance of the pre-erythrocytic phase of infection in the development  
294 of the immune response and the subsequent progression of ECM. The present findings also  
295 emphasize the importance of investigating *Plasmodium* genes whose pathologic relevance may  
296 be underestimated based on the stage of the infection.

297 Our precedent studies reported that PMIF promotes inflammatory signaling through the  
298 host MIF receptor CD74 [15]. We show herein that PMIF increases the expression of CD74 in  
299 the brain of infected mice and serves a previously unforeseen role in the cross-presentation of  
300 *Plasmodium* antigens to promote a CD8+ T cell-mediated, pathologic inflammatory response.  
301 Increased IFN $\gamma$  expression also is a feature of ECM pathology [33] and may further contribute  
302 to brain endothelial CD74 expression [34]. While dendritic cells are considered the primary  
303 antigen-presenting cells responsible for activating CD4 and CD8 T cell responses against  
304 *Plasmodium* [35], endothelial cell activation contributes importantly to blood-brain barrier

305 breakdown and neurological disease [6, 22]. Our data further implicate PMIF, which appears  
306 to be universally expressed by the *Plasmodium* genus [30, 31], and its interaction with  
307 hepatocyte CD74 as an adaptive mechanism for sporozoites to usurp a host-protective  
308 apoptosis pathway to prevent their destruction and enable differentiation and patent infection.

309 Independent genetic studies indicate that relative increases in liver CD74 expression  
310 correlate with enhanced susceptibility to hepatocyte infection by sporozoites [16].  
311 Immunostaining studies suggest that PMIF is expressed on the surface of infective sporozoites  
312 and within the parasitophorous vacuole during liver stage development [12, 14]. The precise  
313 localization of PMIF interaction with host CD74 is currently unclear; however, we suggest two  
314 possible scenarios: 1) by contact between PMIF on the invading sporozoite and CD74  
315 expressed on the hepatocyte cell surface, or 2) after sporozoite internalization and contact  
316 between PMIF in the parasitophorous vacuole and endosomal-expressed CD74 during later-  
317 stage *Plasmodium* development [36]. Either pathway could initiate activation of Akt and  
318 cellular pro-survival pathways [27]. It is also notable that PMIF vaccination is associated with  
319 a more robust liver resident memory CD8<sup>+</sup> T cell response, suggesting that the apoptotic  
320 destruction of infected hepatocytes promotes the development of protective immunity [13].

321 We additionally show that the PMIF/CD74 interaction pathway is amenable to  
322 pharmacologic targeting. The PMIF selective antagonist 26k [28,29] recapitulates the  
323 experimental effects of genetic PMIF or CD74 deficiency, and short term administration of 26k  
324 reduced *PbA* intrahepatic development and provided complete protection against cerebral  
325 malaria. Together with precedent co-crystallization studies supporting the selectivity of 26k for  
326 PMIF versus host MIF, these results provide proof-of-concept for pharmacologic PMIF  
327 antagonism as a tractable approach for malaria prophylaxis or liver-stage treatment, and  
328 potentially across a range of *Plasmodium* species and strains [29]. PMIF is highly conserved  
329 among *Plasmodium* species, with only five single nucleotide polymorphisms in PMIF among  
330 the 202 sequenced strains of *P. falciparum* present in the PlasmoDB resource [9, 10]. This high  
331 degree of structural conservation may be auspicious for therapeutic targeting, particularly in a  
332 genetically complex pathogen prone to resistance development. Additional studies to optimize  
333 the absorption, distribution, metabolism, and excretion properties of 26k will be necessary to  
334 advance PMIF selective inhibitors such as 26K into clinical utility.

## 335 **Materials and Methods**

336

### 337 **Mice**

338 Female WT or *Cd74*<sup>-/-</sup> C57BL/6J mice between 6-10 weeks of age were purchased from The  
339 Jackson Laboratory and used for the study. *Cd8*<sup>-/-</sup>*Cd74*<sup>-/-</sup> mice were obtained by crossing *Cd8*<sup>-/-</sup>  
340 <sup>-/-</sup> with *Cd74*<sup>-/-</sup> mice. Swiss Webster mice were obtained from The Jackson Laboratory. All  
341 animals were maintained in a specific pathogen-free facility at Yale Animal Resource Center.  
342 All animal procedures followed federal guidelines and were approved by the Yale University  
343 Animal Care and Use Committee, approval number 2017-10929.

### 344 **Parasites and infection**

345 *Pb*AWT (MR4), *PbAmif*<sup>-</sup> (Leiden Malaria Group) [14], or *Pb*AWT-GFP-luciferase (MR4)  
346 parasites were cycled between Swiss Webster mice and *Anopheles stephensi* mosquitoes. For  
347 erythrocytic infection, cryopreserved stocks of infected red blood cells (iRBCs) were injected  
348 (10<sup>6</sup> iRBCs/mouse), and blood parasitemia was monitored by Giemsa-stained blood smears  
349 and flow cytometry [13]. For the pre-erythrocytic stage infection, salivary gland sporozoites  
350 were extracted from infected mosquitoes on day 19 post-blood meal infection. WT or *Cd74*<sup>-/-</sup>  
351 C57BL/6J mice were infected by i.v. tail injection of 2000 *Pb*AWT, *PbAmif*<sup>-</sup> or *Pb*AWT-GFP-  
352 luciferase sporozoites, and blood patency was monitored beginning day 3 by blood smear and  
353 flow cytometry. Liver parasite burden was monitored at 48 h after infection using an IVIS  
354 imaging system (Caliper) or quantitative PCR [13].

355 For adoptive transfer, splenocytes were isolated six days after infection of WT or *Cd74*<sup>-/-</sup> mice  
356 infected with 10<sup>6</sup> *Pb*AWT iRBC, CD8 T cells were purified with anti-CD8 (Ly-2, Miltenyi  
357 Biotech) according to the manufacturer's protocol. 1x10<sup>7</sup> cells were transferred, i.v. into  
358 recipient C57BL/6J *Cd8*<sup>-/-</sup> or *Cd8*<sup>-/-</sup>*Cd74*<sup>-/-</sup> mice and mice infected three days after with 10<sup>6</sup>  
359 *Pb*AWT iRBC.

### 360 **Hepatocyte infection, apoptosis induction, Annexin V assay, and quantification of p53 by** 361 **western blotting**

362 For apoptosis assessment, 1x10<sup>5</sup> HepG2 cells (ATCC) were seeded in complete EMEM  
363 medium (ATCC) (10% FBS (Atlanta Biologicals), 1% streptomycin/penicillin (Thermo-  
364 Fisher), and infected with 2 x10<sup>3</sup> *Pb*AWT or *PbAmif*<sup>-</sup> sporozoites. 48 h after infection, cells  
365 were treated with 1 mM of SNP (Sodium Nitroprusside, Sigma) for 4 h or left untreated as a  
366 control. For PMIF pharmacologic inhibition, cells were treated with 26k (10 nM, 100 nM) or  
367 with an equivalent concentration of vehicle (0.1% DMSO) (Sigma) before infection. Cells then

368 were detached with Acutase (MP Bio), and cell suspensions split for Western blot or Annexin  
369 V analysis. For Annexin V analyses, cells were stained with Pacific Blue-Annexin V and  
370 7AAD (7-aminoactinomycin D) (Biolegend) before running in an LSRII cytometer (BD  
371 Biosciences). For quantification of p53 by western blotting, *Pb*AWT-infected HepG2  
372 hepatocytes were detached with Accutase (MP Biolabs) and pelleted. Western blots were  
373 performed by lysing cell pellets in RIPA buffer (ThermoFisher) according to standard protocols  
374 and using antibodies directed against p53-Ser<sup>15</sup> (clone 1C12) or total p53 (pAb) (Cell Signaling  
375 Technology). For quantification, density signals were normalized to an anti- $\beta$ -actin Ab  
376 (LICOR) and developed with anti-mouse or anti-rabbit Abs conjugated with HRP (LI-COR  
377 Biosciences). Membranes were visualized using an Odyssey-Fc imaging system (LI-COR  
378 Biosciences). Each western blot panel was developed from the same membrane that was re-  
379 probed after stripping.

#### 380 **Quantification of liver-stage *Pb*AWT and *Pb*Amif- infection, and *Cd74* knockdown**

381 HepG2 liver cells infected with *Pb*AWT or *Pb*Amif- sporozoites were lysed at 24 h or 48 h  
382 after infection, cellular proteins transferred to PVDF membranes (Millipore), and analyzed by  
383 western blotting using anti-CSP (MRA-100) and anti-MSP-1 (MRA-667) antibodies obtained  
384 from MR4 ATCC (Manassas, VA).  $\beta$ -actin was used as a loading control. For treatment with  
385 siRNA, hepatocytes were transfected with 15 pmol of siRNA (Ambion) targeting CD74 mRNA  
386 (3 target sequences in exon 2) or siCtrl (scrambled unrelated sequence) as a negative control.  
387 siRNA was complexed with Lipofectamine RNAimax reagent (ThermoFisher) and added to  
388 the cells for 24 h; cells then were infected with *Pb*AWT sporozoites.

#### 389 **Murine *Pb*A infection and 26k treatment**

390 C57BL/6J mice received three i.p. injections of 26k (4-(3-methoxy-5-methylphenoxy)-2-(4-  
391 methoxyphenyl)-6-methylpyridine) [18], synthesized by CheminPharma LLC (Branford,  
392 Connecticut), at 80 mg/kg after dissolution in PEG400 (Sigma-Aldrich) in a sonicating water  
393 bath. HP-P-cyclodextrin (Sigma-Aldrich) was added to prepare a 4 mg/ml solution. Control  
394 mice received vehicle alone. Immediately after the first i.p. injection, mice were infected i.v.  
395 with  $2 \times 10^3$  *Pb*A-luc-GFP sporozoites; the second and third injections of 26k were given 24 h  
396 and 48 h later, and always after measurement of *Pb*A liver burden. The *Pb*A liver burden was  
397 quantified 48 h after infection by luminescence emission after luciferin injection (Perkin  
398 Elmer) using an IVIS apparatus (Caliper). Livers were excised 48 h after infection, the total  
399 RNA extracted and purified with Trizol (Life Technologies), and parasites quantified by RT-  
400 qPCR using primers for *Pb*18s.

401 **Brain microvessel cross-presentation assay**

402 WT, *Cd74*<sup>-/-</sup>, *Cd8*<sup>-/-</sup> or *Cd8*<sup>-/-</sup>*Cd74*<sup>-/-</sup> C57BL/6J mice were infected by intravenous injection of  
403 sporozoites or by intraperitoneal injection of *PbA* infected red blood cells. Infected mice were  
404 sacrificed when the signs of ECM (head deviation, ataxia) were manifested. Control naïve mice  
405 were sacrificed contemporaneously with the experimental group. The technique for isolating  
406 brain microvessels and quantification of cross-presentation of the parasite-derived GAP50  
407 epitope by LR-BSL8.4a reporter T cells [22] was performed according to the published  
408 protocol [21]. Quantification of  $\beta$ -galactosidase activity by activated LR-BSL8.4a reporter  
409 cells was performed by using a luminescence  $\beta$ -galactosidase assay (ThermoFisher) and the  
410 resultant signal quantified with a microplate reader (Tecan).

411 **Isolation of Brain-infiltrating lymphocytes for flow cytometry.**

412 Naïve or infected WT and *Cd74*<sup>-/-</sup> C57BL/6J mice were sacrificed and perfused intra-cardially  
413 with 20 ml 1x DPBS ('Dulbecco's Phosphate Buffer Saline). Brains were minced in RPMI,  
414 digested with 10  $\mu$ g/ml of DNase I (Sigma) and 0.5 mg/ml for 30 min at 37°C, and  
415 homogenized with a pestle then filtered with a 70  $\mu$ m cell-strainer (BD Falcon). The suspension  
416 then was centrifuged at 200xg for 5min, and the pellet re-suspended in 90% Percoll (GE  
417 Healthcare) and overlaid with a 70%, 50% and 30% Percoll gradient. After centrifugation at  
418 500xg for 10 min, the cell interphase was collected treated with RBC lysis buffer, washed once,  
419 and re-suspended in complete RPMI medium (containing 10% FBS (Atlanta Biologicals) and  
420 1% penicillin-streptomycin (Thermo Fisher)). 100  $\mu$ l of brain cell suspensions were stimulated  
421 with 1  $\mu$ M of peptide (S<sub>11</sub>LLNAKY<sub>18</sub>L) in the presence of 10  $\mu$ g/ml Brefeldin A. After 5 h  
422 incubation at 37°C, the cells were centrifuged and washed once with 100  $\mu$ l DPBS + 5% FBS.  
423 The cells then were re-suspended and incubated with FITC-labelled S<sub>11</sub>LLNAKY<sub>18</sub>L-H<sup>-2b</sup>  
424 tetramer for 15 min on ice before staining with anti-CD8-PE Cy7 (clone 53-6.7, Biolegend),  
425 anti-CD4-PerCP Cy 5.5 (clone RM4, Biolegend), and anti-CD11a antibodies in the presence  
426 of FCR-block for 20 min on ice. Cells were washed, pelleted, and permeabilized by re-  
427 suspension in 100  $\mu$ l Fix/Perm buffer on ice for 15 min. Cells then were washed once with 1x  
428 Perm Wash buffer (BD Bioscience) and stained with anti-IFN- $\gamma$ -APC-Cy7 (clone XMG1.2,  
429 Biolegend) and GrmzB-Pe-Cy7 (clone NGZB,eBioescience) in 1x Perm Wash buffer (BD  
430 Bioesciences) for 20 min on ice. Finally, cells were washed, centrifuged once, and re-  
431 suspended in 200  $\mu$ l PBS+5% FBS for flow cytometry. The data were acquired on an LSRII  
432 flow cytometer (BD Biosciences) and analyzed using the FlowJo software (version 10).

433

#### 434 **Patient Samples and PMIF-CD74 binding assay**

435 Sera from a previously characterized *Zambian* cohort of *P. falciparum*-infected patients were  
436 used in the study [15, 37]. The interaction between PMIF and CD74 was analyzed as previously  
437 described [19, 30]. Briefly, 96-well plate were coated with 26 ng/ml of recombinant CD74  
438 ectodomain (aa 114-243) in PBS and incubated overnight at 4°C. After washing with  
439 PBS/0.1% Tween-20, the plate was blocked with Superblock reagent (Pierce) for 2 hours.  
440 Biotinylated recombinant PMIF (5ng/ml) was incubated for 45 min, with human serum (diluted  
441 1:1000) from a previously described repository of healthy donors or subjects with  
442 uncomplicated or complicated malaria [15]. After washing and incubating with Streptavidin-  
443 HRP (Roche), the peroxidase substrate is 3,3'-5,5'-tetramethylbenzidine (TMB, Roche) was  
444 added, and after 20 min incubation, the reaction was stopped with 1N H<sub>2</sub>SO<sub>4</sub>/HCl. The results  
445 were expressed as the percentage of binding in the presence versus the absence of serum.

#### 446 **Statistical analysis**

447 All statistical analysis was performed as described before (15), using Software Prism v.6.0,  
448 (GraphPad). Statistical significance was indicated at *p* values of less than 0.05, 0.01, or 0.001.  
449 All data were expressed as a mean ± SD of at least two independent experiments. Mouse  
450 survival times were analyzed by the Mantel-Cox log-rank test. All other data were first tested  
451 for Gaussian distribution of values using a D'Agostino-Pearson normality test. The statistical  
452 significance of differences was assessed using the Kruskal-Wallis or Mann-Whitney *U* test for  
453 non-parametric data distribution and ANOVA or Student's *t*-test for parametric data.

#### 454 **Ethics Approval**

455 All animal procedures followed federal guidelines and were approved by the Yale University  
456 Animal Care and Use Committee, approval number 2017-10929. De-identified human sera  
457 collected from a prior study were used for in vitro ELISA studies (Yale HIC #0804003730).

458

459

460

461

462

463

464

465 **Figures Legends**

466 **Figure 1. CD74 is overexpressed in the brain of *PbA* infected mice and contributes to**  
467 **ECM development. A**, *Cd74* mRNA expression measured by qPCR in the brains of wild type  
468 (WT) C57BL6/J mice that were either non-infected (NI WT) or infected with  $10^6$  *PbA* iRBC  
469 (INF WT). Results are shown as mean  $\pm$  SD from two independent experiments with 6 animals  
470 per group and experiment: # $p < 0.0001$  by Mann-Whitney test. CD74 deficient (*Cd74*<sup>-/-</sup>) and WT  
471 C57BL6/J mice were infected i.p with  $10^6$  *PbA* iRBC and the **B**, Kaplan–Meier survival plots  
472 for WT and *Cd74*<sup>-/-</sup> mice following infection with *PbA* and **C**, ECM malaria score were  
473 assessed. Data are from two pooled independent experiments with 10 animals per group;  
474  $p < 0.0001$  by log-rank (Mantel Cox) test. Bars represent the  $\pm$  SD of  $n=10$  WT and  $n=10$  *Cd74*<sup>-/-</sup>  
475 <sup>-/-</sup> mice and pooled from three independent experiments. **D**, Transcriptional expression of IFN $\gamma$ ,  
476 perforin and granzyme B was measured in brain tissue of *PbA* infected WT and *Cd74*<sup>-/-</sup> mice  
477 on day 7 after infection by quantitative real-time PCR. Results are expressed as mean  $\pm$  SD of  
478  $n=6$  mice per group pooled from two experiments: \* $p=0.0159$  and \* $p=0.0317$  by two-tailed  
479 Mann-Whitney test. Brain infiltrating lymphocytes from WT and *Cd74*<sup>-/-</sup> *PbA* infected mice  
480 were isolated 7 days after infection, and the number of **E**, pathogenic tetramer-labeled brain  
481 CD8<sup>+</sup> T cells (CD8<sup>+</sup>GAP50Tetra<sup>hi</sup>), expressing **F**, the proinflammatory marker GrzmB  
482 (CD8<sup>+</sup>GAP50Tetra<sup>hi</sup>GrzmB<sup>hi</sup>) measured by flow cytometry. Data are shown as mean  $\pm$  SD of  
483  $n=6$  WT and  $n=6$  *Cd74*<sup>-/-</sup> mice and pooled from two independent experiments; n.s.=non-  
484 significant; \* $p=0.0022$  by two-tailed Mann-Whitney test. **G**, Kaplan-Meier survival plots for  
485 C57BL6/J mice *Cd8*<sup>-/-</sup> and *Cd8*<sup>-/-</sup>*Cd74*<sup>-/-</sup> receiving CD8<sup>+</sup> T cells isolated from *PbA* infected WT  
486 or *Cd74*<sup>-/-</sup> and infected with i.p with  $10^6$  *PbA* WT iRBC. Data are from three pooled independent  
487 experiments with 6 animals per group;  $p < 0.0001$  by log-rank (Mantel Cox) test.

488 **Figure 2. Cross-presentation of *Plasmodium* antigen by brain endothelium is Cd74**  
489 **dependent.** Cross-presentation of *PbA*GAP<sub>50</sub> by brain endothelial cells. **A**, BEC isolated from  
490 WT and *Cd74*<sup>-/-</sup> mice were stimulated with 10 ng/ml IFN $\gamma$  for 24 h, and then incubated for  
491 additional 24h with *PbA* mature stage iRBCS before co-culture with LR-BSL8.4a reporter cells  
492 overnight prior to  $\beta$ -galactosidase activity assessment. Data are shown as mean  $\pm$  SD of three  
493 independent biological replicates performed in triplicate; # $p < 0.0001$  by Mann-Whitney test. **B**,  
494 Brain microvessel cross-presentation of *PbA*GAP<sub>50</sub> from naïve and *PbA* infected WT and  
495 *Cd74*<sup>-/-</sup> mice. Mice were infected with  $10^6$  *PbA*, iRBC and brain microvessels were isolated  
496 when WT-infected mice exhibited neurological signs at 7 days after infection and co-incubated  
497 with LR-BSL8.4a reporter cells for 24 h and then assessed for  $\beta$ -galactosidase activity. Data

498 are shown as mean  $\pm$  SD of n=6 mice per group and pooled from two independent biological  
499 replicates; \*\*p=0.0021 by Mann-Whitney test. **C**, Brain microvessel cross-presentation of  
500 *PbAGAP50* from *Cd8<sup>-/-</sup>* and *Cd8<sup>-/-</sup>Cd74<sup>-/-</sup>* receiving CD8<sup>+</sup> T cells isolated from *PbA* infected  
501 WT or *Cd74<sup>-/-</sup>* mice three days before the infection with 10<sup>6</sup> *PbAWT* iRBC. Brain microvessels  
502 were isolated when the first infected mice exhibited neurological signs at 7 days after infection  
503 and co-incubated with LR-BSL8.4a reporter cells for 24 h and then assessed for  $\beta$ -galactosidase  
504 activity. Data are shown as mean  $\pm$  SD of n=5 mice per group and pooled from two independent  
505 biological replicates; #p=0.0017 and \*\*p<0.0001 by Kruskal-Wallis test.

506 **Figure 3. PMIF contributes to the development of ECM.** **A**, Kaplan-Meier survival plots  
507 for C57BL6/J mice infected with i.p with 10<sup>6</sup> *PbAWT* or *PbAmif<sup>-</sup>* iRBC. Data are from two  
508 pooled independent experiments with a total of 6 animals per group. n.s: non-significant by  
509 log-rank (Mantel Cox) test. **B**, Kaplan-Meier survival plots for C57BL6/J mice infected with  
510 2x10<sup>3</sup> *PbAWT* or *PbAmif<sup>-</sup>* sporozoites. Data are from three pooled independent experiments  
511 with a total of 6 animals per group; p<0.0001 by log-rank (Mantel Cox) test. WT C57BL6/J  
512 mice were infected i.v with 2x10<sup>3</sup> *PbAWT* or *PbAmif<sup>-</sup>* sporozoites. **C**, CD74 transcript  
513 expression in the brain of infected mice was measured by q-PCR at day 8 after infection.  
514 Results are expressed as mean  $\pm$  SD of n=6 mice per group pooled from two experiments;  
515 \*\*p=0.0022 by Mann-Whitney test. **D**, Transcriptional expression of IFN $\gamma$ , Perforin and  
516 Granzyme B was measured in brain tissue of *PbAWT* or *PbAmif<sup>-</sup>* infected WT mice on day 8  
517 after infection by quantitative real-time PCR. Results are expressed as mean  $\pm$  SD of n=6 mice  
518 per group pooled from two experiments; \*\*p=0.0022 for Perforin and IFN $\gamma$  and \*\*p=0.0317  
519 for Granzyme B, by two-tailed Mann-Whitney test. **E**, Brain microvessel cross-presentation of  
520 *PbAGAP50* from naïve (NI) and *PbAWT* or *PbAmif<sup>-</sup>* infected WT mice. Mice were infected  
521 with *PbAWT* or *PbAmif<sup>-</sup>* sporozoites and brain microvessels were isolated when *PbAWT*-  
522 infected mice exhibited neurological signs at 7 days after infection. Microvessels then were co-  
523 incubated with LR-BSL8.4a reporter cells for 24 h and then assessed for  $\beta$ -galactosidase  
524 activity. Data are shown as mean  $\pm$  SD of n=6 mice per group and pooled from two independent  
525 biological replicates; \*\*p=0.0021 by Mann-Whitney test.

526 **Figure 4. PMIF promotes *Plasmodium*-infected hepatocyte survival and p53 inhibition**  
527 **through host CD74.** 1x10<sup>5</sup> HepG2 cells were infected with 2x10<sup>3</sup> *PbAWT* or *PbAmif<sup>-</sup>*  
528 sporozoites. **A**, Parasite load was measured by quantitative PCR of *PbA* 18S rRNA relative to  
529 host GAPDH 48 h after infection. Data are from three independent experiments performed in  
530 duplicate. Bars represent the mean  $\pm$  SD; \*p=0.0286 by Mann-Whitney test. 1x10<sup>5</sup> *PbAWT* or



531 *PbAmif*-infected HepG2 cells, were cultured for 48 h and treated with 1 mM of the NO donor  
532 sodium nitroprusside (SNP) for 4 h to induce apoptosis. **B**, Percentage of apoptotic cells  
533 measured by AnnexinV and 7AAD (7-amino-actinomycin D) staining. Data are from three  
534 independent experiments performed in duplicate. Bars represent the mean  $\pm$  SD; \* $p=0.0133$ ;  
535 \*\* $p=0.0011$ ;  $^{\Psi}p<0.0001$ ; by Kruskal-Wallis test. **C**, Lysates of the same HepG2 cells in C  
536 were assessed for total p53 and p53<sup>Ser15</sup> by Western blotting. NI: non-infected. Numerals  
537 represent the mean densitometric scanning ratios. Data are representative of two independent  
538 replicates experiments for the western blot analysis.  $1 \times 10^5$  HepG2 cells were treated with 10  
539 nM of shRNA directed at CD74 (shCD74) or a control shRNA (shCon), and infected 24 h later  
540 with  $2 \times 10^3$  *PbAWT* sporozoites. **D**, Parasite load was measured by quantitative PCR of *PbA*  
541 18S rRNA relative to host GAPDH. Data are from three independent experiments performed  
542 in duplicate. Bars represent the mean  $\pm$  SD; \*\* $p=0.002$  by Mann-Whitney test.  $1 \times 10^5$  shCon  
543 or shCd74 treated HepG2 cells, were infected with  $2 \times 10^3$  *PbAWT* sporozoites and cultured  
544 for 48 h. shRNA cells were then treated with 1 mM of the NO donor SNP for 4 h to induce  
545 apoptosis **E**, Percentage of apoptotic (measured by AnnexinV and 7AAD staining) *PbAWT*  
546 infected HepG2 cells treated with shCon or shCD74. Data are from three independent  
547 experiments performed in duplicate. Bars represent the mean  $\pm$  SD; \*\* $p=0.0095$  and n.s.=non-  
548 significant; by Kruskal-Wallis test. **F**, Lysates of the same hepatocytes as in E were assessed  
549 for total p53 and p53<sup>Ser15</sup> by Western blotting with  $\beta$ -actin as loading control. NI: non-infected,  
550 INF: *PbAWT* infected. Numerals represent the mean densitometric scanning ratios. Data are  
551 representative of two independent replicate experiments for the western blot analysis. **G**, Wild  
552 type (WT) or *Cd74*<sup>-/-</sup> C57BL/6J mice were infected i.v. with  $2 \times 10^3$  *PbA*-luciferase sporozoites  
553 and liver *PbA*-luc load quantified by luminescence at 48 h after infection. Bars represent the  
554 mean  $\pm$  SD; \*\* $p=0.0022$ ; by Mann-Whitney test.

555

556 **Figure 5. Inhibition of PMIF/CD74 axis is associated with protection from severe malaria.**

557 **A**. Effect of human serum on PMIF binding to the immobilized human CD74 ectodomain (aa  
558 134-232). Measured values are relative to control without serum for each condition (n=6  
559 healthy uninfected controls, n=6 uncomplicated malaria, n=6 complicated malaria. Mean $\pm$ SD;  
560 # $p<0.0001$  by 1-way ANOVA. **B**, Percentage of apoptotic *PbAWT* infected HepG2 cells  
561 measured by AnnexinV and 7AAD staining after 26k or vehicle treatment.  $1 \times 10^5$  *PbAWT*  
562 infected hepatocytes treated with 26K (100 nM) or vehicle were cultured for 48 h followed by  
563 the addition of the NO donor SNP (1 mM) for 4 h to induce apoptosis. Data are from three  
564 independent experiments performed in duplicate. Bars represent the mean  $\pm$  SD; \* $p=0.0011$ ;

565 by two-tailed Mann-Whitney test. **C**, *Pb*AWT infected HepG2 cells were lysed and assessed  
566 for total p53 and p53<sup>Ser15</sup> by Western blotting with  $\beta$ -actin as loading control. Numerals  
567 represent the mean densitometric scanning ratios. Data are representative of two independent  
568 replicate experiments for the western blot analysis. NI: non-infected, INF: *Pb*A infected.  
569 C57BL/6J mice were treated with vehicle or 26k (80 mg/kg, ip) before (0 h), 24 h, and 48 h  
570 after i.v. infection with  $2 \times 10^3$  *Pb*A-luciferase sporozoites. **D**, Liver *Pb*A-luc burden was  
571 quantified by luminescence and **E**, by qPCR of liver *Pb*A 18S rRNA relative to host GAPDH  
572 48 h after infection. Bars represent the mean  $\pm$  SD; \*\*p=0.0043 (**D**), \*\*p=0.0079 (**E**); by Mann-  
573 Whitney test. **F**, Kaplan–Meier survival plots for vehicle and 26k treated mice following  
574 infection with *Pb*A-luc sporozoites. Data are from two pooled independent experiments with 6  
575 animals per group; \*\*p = 0.0023 by log-rank (Mantel Cox) test. **G**, Brain microvessel cross-  
576 presentation of *Pb*AGAP50 from vehicle and 26k treated mice following infection with *Pb*A-  
577 luc sporozoites. Brains microvessels were isolated when vehicle-treated, infected mice  
578 exhibited neurological signs at 9 days after infection and co-incubated with LR-BSL8.4a  
579 reporter cells for 24 h and then assessed for  $\beta$ -galactosidase activity. Data are shown as mean  
580  $\pm$  SD of n=6 mice per group and pooled from two independent biological replicates;  
581 \*\*p=0.0022 by two-tailed Mann-Whitney test.

582 **Figure S1. CD74 is necessary for the development of ECM.** **A**, Peripheral blood parasitemia  
583 for CD74 deficient (*Cd74*<sup>-/-</sup>) and WT C57BL6/J mice infected i.p with  $10^6$  *Pb*A iRBC. **B**,  
584 Peripheral blood parasitemia during the 6 first days of infection. Data are shown as mean  $\pm$  SD  
585 of n=10 WT and n=10 *Cd74*<sup>-/-</sup> mice and pooled from three independent experiments. Wild type  
586 (WT) and *Cd74*<sup>-/-</sup> C57BL6/J mice were infected i.p with  $10^6$  *PbAmif* iRBC **C**, Kaplan–Meier  
587 survival plots for WT and *Cd74*<sup>-/-</sup> mice following infection with *PbAmif*. Data are from two  
588 pooled independent experiments with 10 animals per group; p < 0.0001 by log-rank (Mantel  
589 Cox) test **D**, peripheral blood parasitemia. **E**, ECM malaria score was assessed as described  
590 before. Data are shown as mean  $\pm$  SD of n=7 WT and n=10 *Cd74*<sup>-/-</sup> mice and pooled from 2  
591 independent experiments. **F**, *Pb*A18s transcript expression in the brain of infected WT and  
592 *Cd74*<sup>-/-</sup> measured by quantitative real-time PCR 7 days after infection was measured in brains  
593 tissue of *Pb*A infected WT and *Cd74*<sup>-/-</sup> mice on day 7 after infection by quantitative real-time  
594 PCR. Results are expressed as mean  $\pm$  SD of n=6 mice per group pooled from two experiments;  
595 n.s.: non-significant by Mann-Whitney test.

596 **Figure S2. PMIF influences *Pb*A liver-stage development and promotes survival of**  
597 ***Plasmodium*-infected hepatocytes by inhibiting p53 activity.**  $1 \times 10^5$  HepG2 cells were

598 infected with  $2 \times 10^3$  *PbAWT* or *PbAmif*<sup>-</sup> sporozoites. Hepatocellular content of A, CSP and  
599 B, MSP-1 at 24 h and 48 h after infection with  $2 \times 10^3$  *PbAWT* or *PbAmif*<sup>-</sup> sporozoites assessed  
600 by western blot relative to  $\beta$ -actin as loading control. Hepatocellular content of MSP-1 at 48 h  
601 after infection with  $2 \times 10^3$  *PbAWT* or *PbAmif*<sup>-</sup> sporozoites was also assessed by western blot  
602 relative to *PbAHSP70* as loading control. Cultured hepatocytes ( $1 \times 10^5$  HepG2 cells/well)  
603 infected with  $2 \times 10^3$  *PbAWT* or *PbAmif*<sup>-</sup> sporozoites followed by the addition of 1 mM SNP at  
604 4 h and 48 h after infection. C, Lysates were assessed for total Akt and pAkt<sup>Ser473</sup> by Western  
605 blotting with  $\beta$ -actin as loading control. Numerals represent the densitometric scanning ratios.  
606 D, Transcriptional expression of IFN $\gamma$ , Perforin and Granzyme B was measured in brain tissue  
607 of *PbAWT* or *PbAmif*<sup>-</sup> infected WT mice on day 8 after infection by quantitative real-time  
608 PCR. Results are expressed as mean  $\pm$  SD of n=6 mice per group pooled from two experiments;  
609 \*\*p=0.0022 for Perforin and IFN $\gamma$  and \*\*p=0.0317 for Granzyme B, by two-tailed Mann-  
610 Whitney test.  $1 \times 10^5$  HepG2 cells were treated with 10 nM of shRNA directed at CD74  
611 (shCD74) or a control shRNA (shCon), and infected 24 h later with  $2 \times 10^3$  *PbAWT* sporozoites.  
612 E, *Cd74* mRNA expression measured by qPCR in HepG2 after 48h treatment. Data are from  
613 three independent experiments performed in duplicate. Bars represent the mean  $\pm$  SD; \*\*p=  
614 0.002 by Mann-Whitney test. Wild type (WT) or *Cd74*<sup>-/-</sup> C57BL/6J mice were infected i.v.  
615 with  $2 \times 10^3$  *PbA*-luciferase sporozoites and liver *PbA*-luc load quantified by luminescence at  
616 48 h after infection. Bars represent the mean  $\pm$  SD; \*\*p=0.0022; by Mann-Whitney test. F,  
617 Kaplan-Meier plots showing the percentage of WT (●) and *Cd74*<sup>-/-</sup> (○) C57BL/6J mice with  
618 blood-stage patency following i.v. infection with  $2 \times 10^3$  *PbA*-luc sporozoites. Patency was  
619 determined by microscopic enumeration of thin blood smears. Data are from two independent  
620 experiments, with 3-4 animals per group; p<0.0001 by Log-rank (Mantel Cox) test.

621 **Figure S3. The small molecule PMIF antagonist 26k reduces PMIF/CD74 signal**  
622 **transduction and protects from ECM. A.** BMDM were treated with or without recombinant  
623 PMIF pre-incubated with vehicle control (DMSO) or small molecule 26k (10,50 or 100 nM)  
624 for 2h. Cells were lysed and the lysates assessed for total ERK and pERK<sup>Thr202/Tyr204</sup> by western  
625 blotting. Numerals represent the densitometric scanning ratios. HepG2 cells ( $1 \times 10^5$  cells/well)  
626 were infected with  $2 \times 10^3$  *PbAWT* sporozoites and treated with 26k or vehicle. B,  
627 Hepatocellular parasite load was measured by quantitative PCR of *PbA* 18S rRNA relative to  
628 host GAPDH 48 h after treatment with 26k (0.5 nM to 50  $\mu$ M) or vehicle. Data are from three  
629 independent experiments performed in duplicate. Bars represent the mean  $\pm$  SD; \*p=0.0336,  
630 \*\*p=0.0021,  $\Psi$ p=0.0008, #p<0.0001 by Kruskal-Wallis test. C57BL/6J mice were treated  
631 with vehicle or 26k (80 mg/kg, ip) before (0 h), 24 h, and 48 h after i.v. infection with  $2 \times 10^3$

632 *PbA*-luciferase sporozoites. **C**, Kaplan-Meier plots showing the percentage of vehicle (○) and  
633 26k (●) treated mice with blood-stage patency (determined by microscopic enumeration of thin  
634 blood smears) following i.v. infection with  $2 \times 10^3$  *PbA*-luc sporozoites and **D**, ECM malaria  
635 score. Data are from two pooled independent experiments, with 6 animals per group  $p < 0.0001$   
636 by Log-rank (Mantel Cox) test. C57BL/6J mice were treated with vehicle or 26k (80 mg/kg,  
637 ip) before (0 h) and then every two days after i.p infection with  $10^6$  *PbA*WT iRBCs. **E**, Kaplan-  
638 Meier survival plots for vehicle (○) and 26k (●) treated mice following infection with *PbA*  
639 iRBC. Data are from two pooled independent experiments with 8 total animals per group;  
640  $p = 0.0137$  by log-rank (Mantel Cox) test.

## 641 References

- 642 1. WHO. World malaria report 2019. 2019.
- 643 2. Langhorne J, Ndungu FM, Sponaas A-M, Marsh K. Immunity to malaria: more  
644 questions than answers. *Nature Immunology*. 2008;9:725. doi: 10.1038/ni.f.205.
- 645 3. Milner DA, Whitten RO, Kamiza S, Carr R, Liomba G, Dzamalala C, et al. The  
646 systemic pathology of cerebral malaria in African children. *Frontiers in Cellular and Infection  
647 Microbiology*. 2014;4(104). doi: 10.3389/fcimb.2014.00104.
- 648 4. Riggall BA, Mangani M, Maric D, Johnson KR, Lee M-H, Neto OLA, et al. CD8+ T  
649 cells target cerebrovasculature in children with cerebral malaria. *The Journal of Clinical  
650 Investigation*. 2020;130(3):1128-38. doi: 10.1172/JCI133474.
- 651 5. Shaw TN, Stewart-Hutchinson PJ, Strangward P, Dandamudi DB, Coles JA, Villegas-  
652 Mendez A, et al. Perivascular Arrest of CD8+ T Cells Is a Signature of Experimental Cerebral  
653 Malaria. *PLOS Pathogens*. 2015;11(11):e1005210. doi: 10.1371/journal.ppat.1005210.
- 654 6. Howland SW, Poh CM, Rénia L. Activated Brain Endothelial Cells Cross-Present  
655 Malaria Antigen. *PLOS Pathogens*. 2015;11(6):e1004963. doi: 10.1371/journal.ppat.1004963.
- 656 7. Aurrecochea C, Brestelli J, Brunk BP, Dommer J, Fischer S, Gajria B, et al.  
657 PlasmoDB: a functional genomic database for malaria parasites. *Nucleic Acids Research*.  
658 2008;37(suppl\_1):D539-D43. doi: 10.1093/nar/gkn814.
- 659 8. Aurrecochea C, Barreto A, Basenko EY, Brestelli J, Brunk BP, Cade S, et al.  
660 EuPathDB: the eukaryotic pathogen genomics database resource. *Nucleic Acids Research*.  
661 2016;45(D1):D581-D91. doi: 10.1093/nar/gkw1105.
- 662 9. Mitchell RA, Liao H, Chesney J, Fingerle-Rowson G, Baugh J, David J, et al.  
663 Macrophage migration inhibitory factor (MIF) sustains macrophage proinflammatory function  
664 by inhibiting p53: Regulatory role in the innate immune response. *Proceedings of the National  
665 Academy of Sciences*. 2002;99(1):345-50. doi: 10.1073/pnas.012511599.
- 666 10. Leng L, Metz CN, Fang Y, Xu J, Donnelly S, Baugh J, et al. MIF Signal Transduction  
667 Initiated by Binding to CD74. *The Journal of Experimental Medicine*. 2003;197(11):1467-76.  
668 doi: 10.1084/jem.20030286.
- 669 11. Kamir D, Zierow S, Leng L, Cho Y, Diaz Y, Griffith J, et al. A *Leishmania*  
670 Ortholog of Macrophage Migration Inhibitory Factor Modulates Host Macrophage Responses.  
671 *The Journal of Immunology*. 2008;180(12):8250-61. doi: 10.4049/jimmunol.180.12.8250.
- 672 12. Miller JL, Harupa A, Kappe SHI, Mikolajczak SA. *Plasmodium yoelii* Macrophage  
673 Migration Inhibitory Factor Is Necessary for Efficient Liver-Stage Development. *Infection and  
674 Immunity*. 2012;80(4):1399-407. doi: 10.1128/iai.05861-11.
- 675

- 676 13. Baeza Garcia A, Siu E, Sun T, Exler V, Brito L, Hekele A, et al. Neutralization of the  
677 Plasmodium-encoded MIF ortholog confers protective immunity against malaria infection.  
678 Nature Communications. 2018;9(1):2714. doi: 10.1038/s41467-018-05041-7.
- 679 14. Augustijn KD, Kleemann R, Thompson J, Kooistra T, Crawford CE, Reece SE, et al.  
680 Functional Characterization of the Plasmodium falciparum and P. berghei Homologues of  
681 Macrophage Migration Inhibitory Factor. Infection and Immunity. 2007;75(3):1116-28. doi:  
682 10.1128/iai.00902-06.
- 683 15. Sun T, Holowka T, Song Y, Zierow S, Leng L, Chen Y, et al. A Plasmodium-encoded  
684 cytokine suppresses T-cell immunity during malaria. Proceedings of the National Academy of  
685 Sciences. 2012;109(31):E2117–E26. doi: 10.1073/pnas.1206573109.
- 686 16. Kaushansky A, Austin LS, Mikolajczak SA, Lo FY, Miller JL, Douglass AN, et al.  
687 Susceptibility to Plasmodium yoelii Preerythrocytic Infection in BALB/c Substrains Is  
688 Determined at the Point of Hepatocyte Invasion. Infection and Immunity. 2015;83(1):39-47.  
689 doi: 10.1128/iai.02230-14.
- 690 17. Sato Y, Ries S, Stenzel W, Fillatreau S, Matuschewski K. The Liver-Stage Plasmodium  
691 Infection Is a Critical Checkpoint for Development of Experimental Cerebral Malaria.  
692 Frontiers in Immunology. 2019;10(2554). doi: 10.3389/fimmu.2019.02554.
- 693 18. Dahlgren MK, Garcia AB, Hare AA, Tirado-Rives J, Leng L, Bucala R, et al. Virtual  
694 Screening and Optimization Yield Low-Nanomolar Inhibitors of the Tautomerase Activity of  
695 Plasmodium falciparum Macrophage Migration Inhibitory Factor. Journal of Medicinal  
696 Chemistry. 2012;55(22):10148-59. doi: 10.1021/jm301269s.
- 697 19. Pantouris G, Rajasekaran D, Garcia AB, Ruiz VG, Leng L, Jorgensen WL, et al.  
698 Crystallographic and Receptor Binding Characterization of Plasmodium falciparum  
699 Macrophage Migration Inhibitory Factor Complexed to Two Potent Inhibitors. Journal of  
700 Medicinal Chemistry. 2014;57(20):8652-6. doi: 10.1021/jm501168q.
- 701 20. Sun T, Holowka T, Song Y, Zierow S, Leng L, Chen Y, et al. A  
702 *Plasmodium*-encoded cytokine suppresses T-cell immunity during malaria.  
703 Proceedings of the National Academy of Sciences. 2012;109(31):E2117-E26. doi:  
704 10.1073/pnas.1206573109.
- 705 21. Howland SW, Claser C, Poh CM, Gun SY, Rénia L. Pathogenic CD8+ T cells in  
706 experimental cerebral malaria. Seminars in Immunopathology. 2015;37(3):221-31. doi:  
707 10.1007/s00281-015-0476-6.
- 708 22. Howland SW, Poh CM, Gun SY, Claser C, Malleret B, Shastri N, et al. Brain  
709 microvessel cross-presentation is a hallmark of experimental cerebral malaria. EMBO  
710 Molecular Medicine. 2013;5(7):984-99. doi: 10.1002/emmm.201202273.
- 711 23. Cresswell P. Assembly, Transport, and Function of MHC Class II Molecules. Annual  
712 Review of Immunology. 1994;12(1):259-91. doi: 10.1146/annurev.iy.12.040194.001355.  
713 PubMed PMID: 8011283.
- 714 24. Basha G, Omilusik K, Chavez-Steenbock A, Reinicke AT, Lack N, Choi KB, et al. A  
715 CD74-dependent MHC class I endolysosomal cross-presentation pathway. Nature  
716 Immunology. 2012;13:237. doi: 10.1038/ni.2225
- 717 <https://www.nature.com/articles/ni.2225#supplementary-information>.
- 718 25. van de Sand C, Horstmann S, Schmidt A, Sturm A, Bolte S, Krueger A, et al. The liver  
719 stage of Plasmodium berghei inhibits host cell apoptosis. Molecular Microbiology.  
720 2005;58(3):731-42. doi: 10.1111/j.1365-2958.2005.04888.x.
- 721 26. Leirião P, Albuquerque SS, Corso S, Van Gemert G-J, Sauerwein RW, Rodriguez A,  
722 et al. HGF/MET signalling protects Plasmodium-infected host cells from apoptosis. Cellular  
723 Microbiology. 2005;7(4):603-9. doi: 10.1111/j.1462-5822.2004.00490.x.

- 724 27. Kaushansky A, Ye Albert S, Austin Laura S, Mikolajczak Sebastian A, Vaughan  
725 Ashley M, Camargo N, et al. Suppression of Host p53 Is Critical for Plasmodium Liver-Stage  
726 Infection. *Cell Reports*. 2013;3(3):630-7. doi: <http://doi.org/10.1016/j.celrep.2013.02.010>.
- 727 28. Prudêncio M, Mota MM, Mendes AM. A toolbox to study liver stage malaria. *Trends*  
728 *in Parasitology*. 2011;27(12):565-74. doi: 10.1016/j.pt.2011.09.004.
- 729 29. Han C, Lin Y, Shan G, Zhang Z, Sun X, Wang Z, et al. Plasma concentration of malaria  
730 parasite-derived macrophage migration inhibitory factor in uncomplicated malaria patients  
731 correlates with parasitemia and disease severity. *Clin Vaccine Immunol*. 2010;17(10):1524-32.  
732 Epub 08/11. doi: 10.1128/CVI.00149-10. PubMed PMID: 20702656.
- 733 30. Cournia Z, Leng L, Gandavadi S, Du X, Bucala R, Jorgensen WL. Discovery of human  
734 macrophage migration inhibitory factor (MIF)-CD74 antagonists via virtual screening. *Journal*  
735 *of medicinal chemistry*. 2009;52(2):416-24. Epub 2008/12/19. doi: 10.1021/jm801100v.  
736 PubMed PMID: 19090668; PubMed Central PMCID: PMCPMC2680181.
- 737 31. Cho Y, Crichlow GV, Vermeire JJ, Leng L, Du X, Hodsdon ME, et al. Allosteric  
738 inhibition of macrophage migration inhibitory factor revealed by ibudilast. *Proc Natl Acad Sci*  
739 *USA*. 2010;107(25):11313-8.
- 740 32. Fox RJ, Coffey CS, Cudkowicz ME, Gleason T, Goodman A, Klawiter EC, et al.  
741 Design, rationale, and baseline characteristics of the randomized double-blind phase II clinical  
742 trial of ibudilast in progressive multiple sclerosis. *Contemp Clin Trials*. 2016;50:166-77. doi:  
743 10.1016/j.cct.2016.08.009. PubMed PMID: 27521810; PubMed Central PMCID:  
744 PMCPMC5035622.
- 745 33. Villegas-Mendez A, Strangward P, Shaw TN, Rajkovic I, Tosevski V, Forman R, et al.  
746 Gamma Interferon Mediates Experimental Cerebral Malaria by Signaling within Both the  
747 Hematopoietic and Nonhematopoietic Compartments. *Infection and immunity*.  
748 2017;85(11):e01035-16. doi: 10.1128/IAI.01035-16. PubMed PMID: 28874445.
- 749 34. Tanese K, Hashimoto Y, Berkova Z, Wang Y, Samaniego F, Lee JE, et al. Cell Surface  
750 CD74-MIF Interactions Drive Melanoma Survival in Response to Interferon- $\gamma$ . *The Journal of*  
751 *investigative dermatology*. 2015;135(11):2775-84. Epub 2015/06/04. doi:  
752 10.1038/jid.2015.204. PubMed PMID: 26039541; PubMed Central PMCID:  
753 PMCPMC4640965.
- 754 35. Fernandez-Ruiz D, Lau LS, Ghazanfari N, Jones CM, Ng WY, Davey GM, et al.  
755 Development of a Novel CD4(+) TCR Transgenic Line That Reveals a Dominant Role for  
756 CD8(+) Dendritic Cells and CD40 Signaling in the Generation of Helper and CTL Responses  
757 to Blood-Stage Malaria. *Journal of immunology (Baltimore, Md : 1950)*. 2017;199(12):4165-  
758 79. Epub 2017/11/01. doi: 10.4049/jimmunol.1700186. PubMed PMID: 29084838; PubMed  
759 Central PMCID: PMCPMC5713497.
- 760 36. Lopes da Silva M, Thieleke-Matos C, Cabrita-Santos L, Ramalho JS, Wavre-Shapton  
761 ST, Futter CE, et al. The host endocytic pathway is essential for Plasmodium berghei late liver  
762 stage development. *Traffic (Copenhagen, Denmark)*. 2012;13(10):1351-63. Epub 2012/07/12.  
763 doi: 10.1111/j.1600-0854.2012.01398.x. PubMed PMID: 22780869.
- 764 37. Thuma PE, van Dijk J, Bucala R, Debebe Z, Nekhai S, Kuddo T, et al. Distinct clinical  
765 and immunologic profiles in severe malarial anemia and cerebral malaria in Zambia. *The*  
766 *Journal of infectious diseases*. 2011;203(2):211-9. Epub 2011/02/04. doi:  
767 10.1093/infdis/jiq041. PubMed PMID: 21288821; PubMed Central PMCID:  
768 PMCPMC3071068.

**Figure 1**

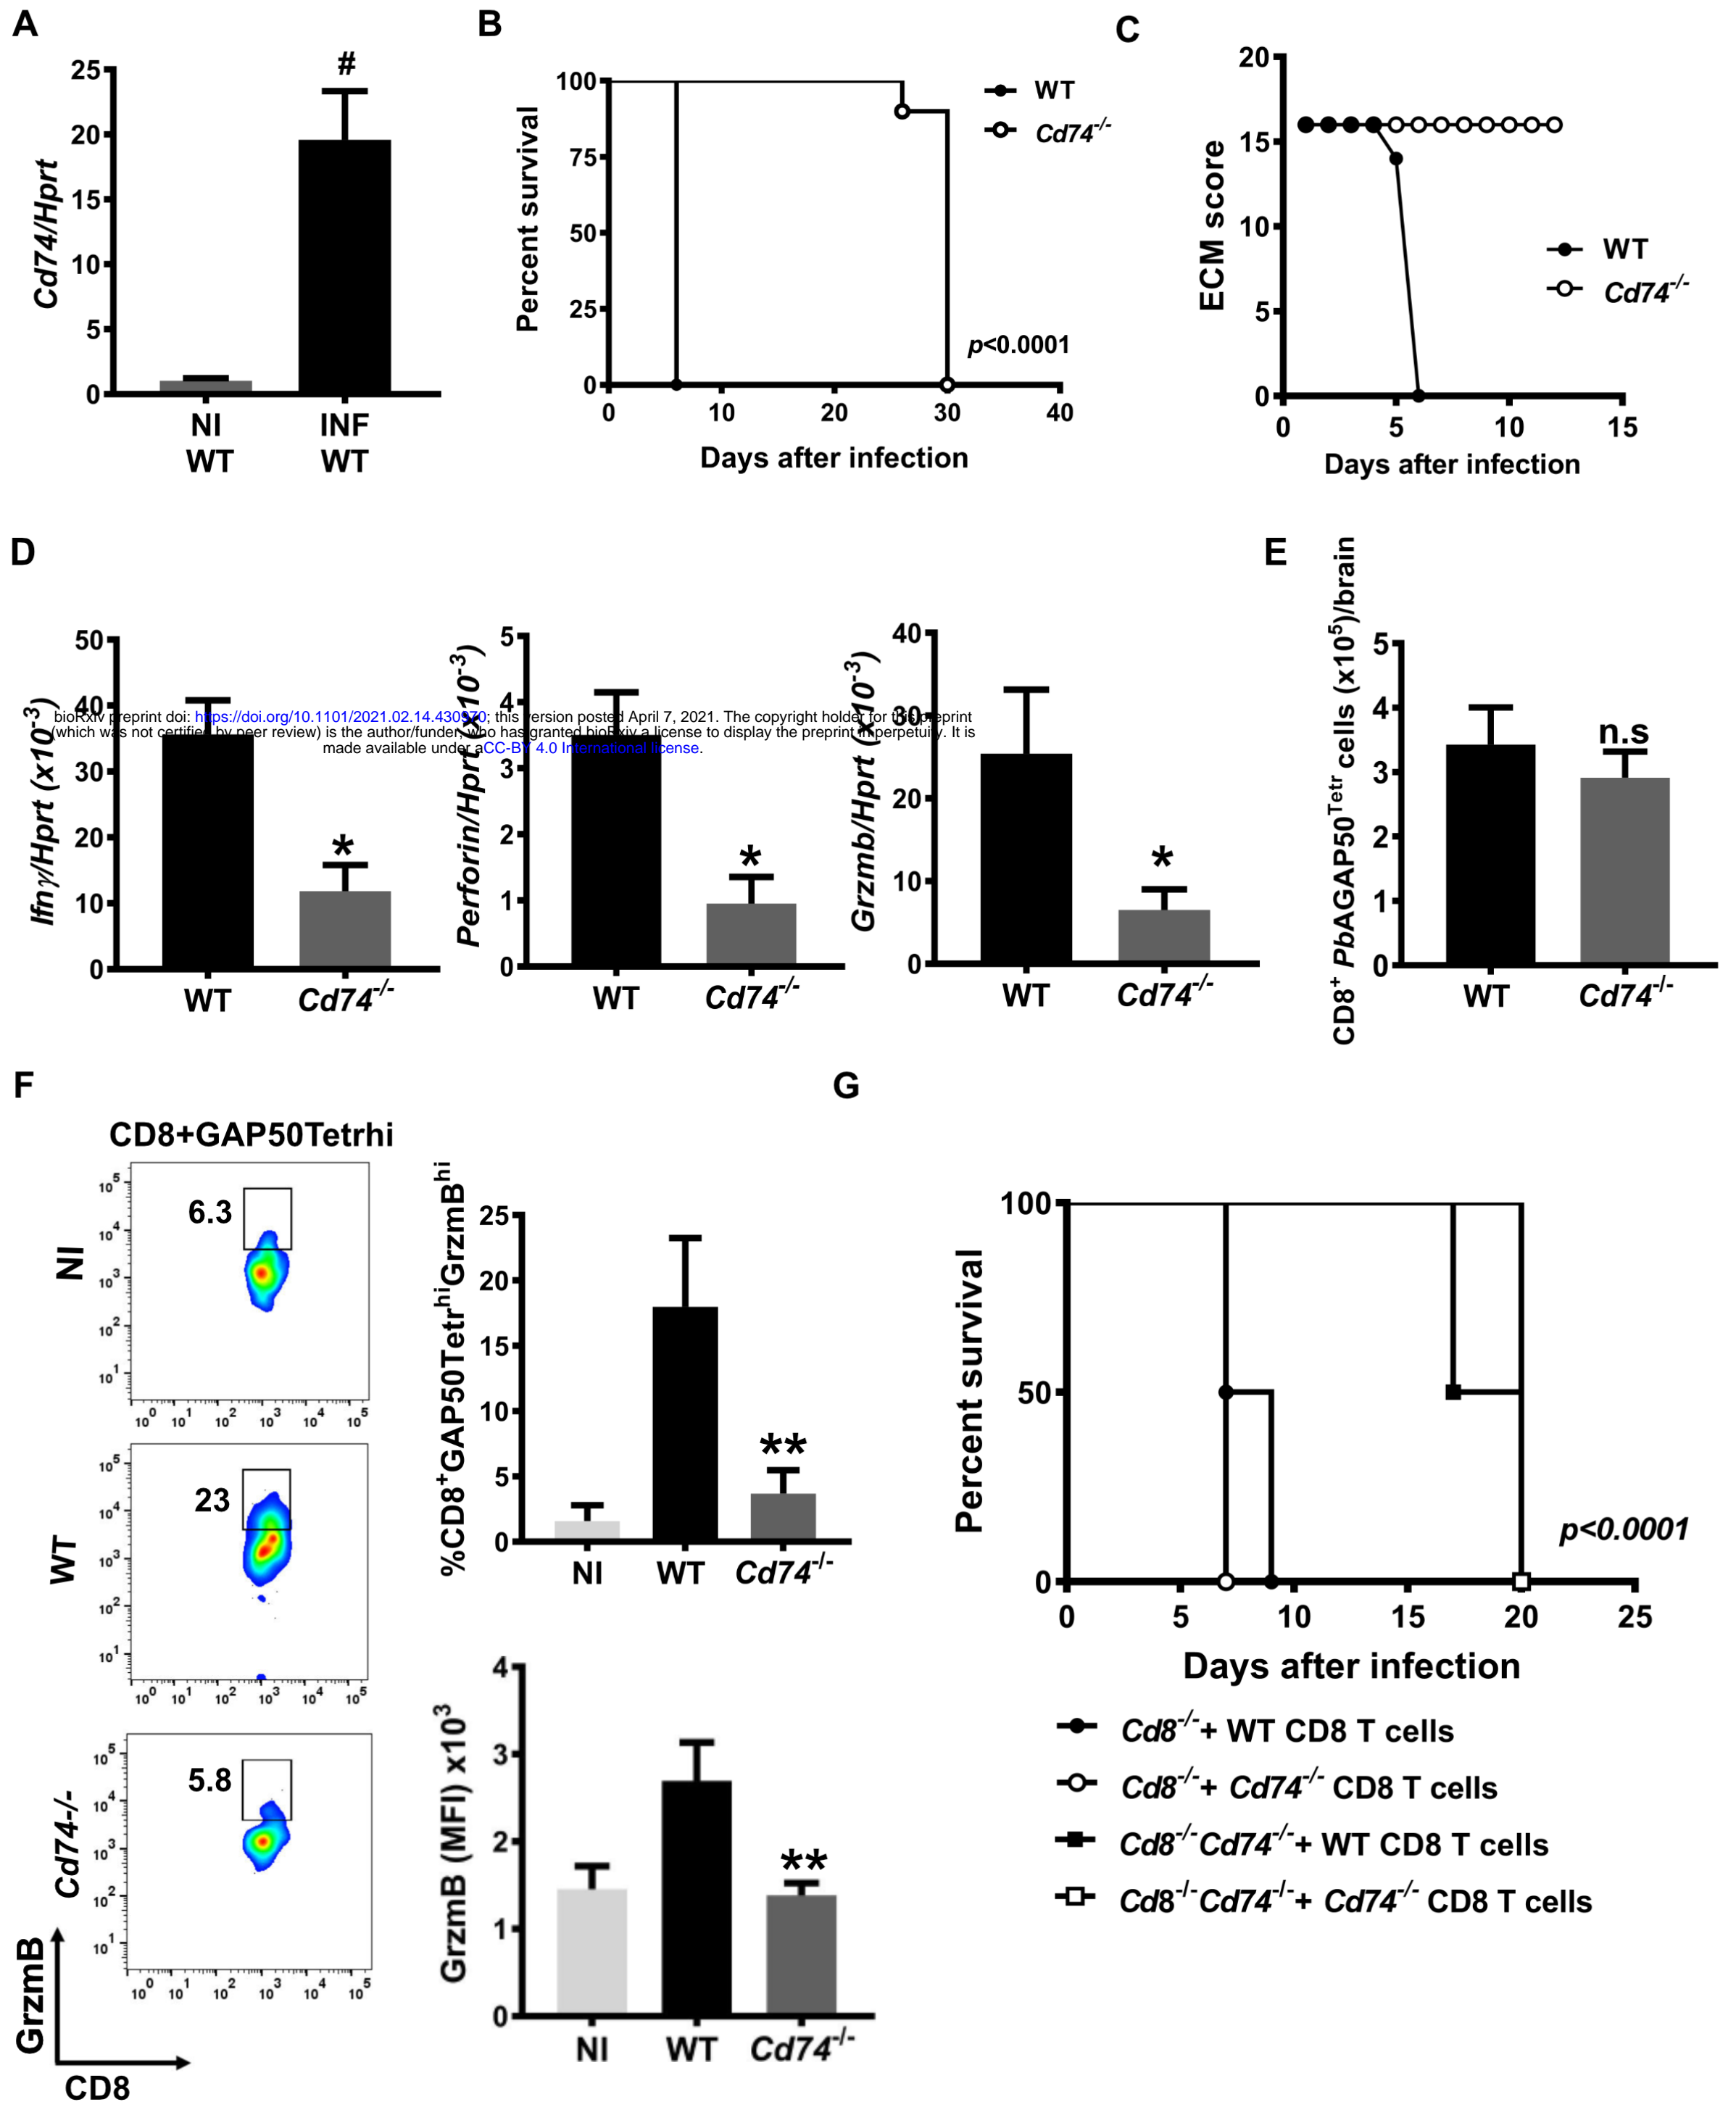

Figure 2

A

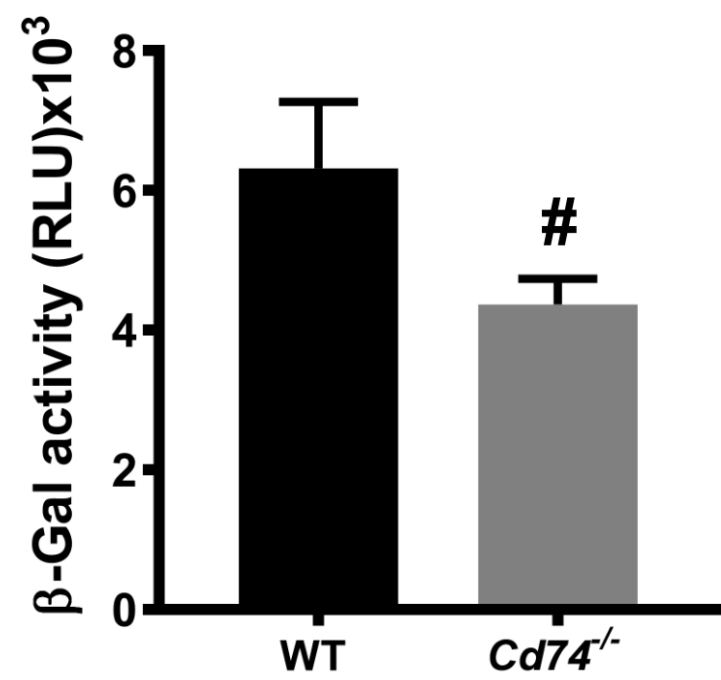

B

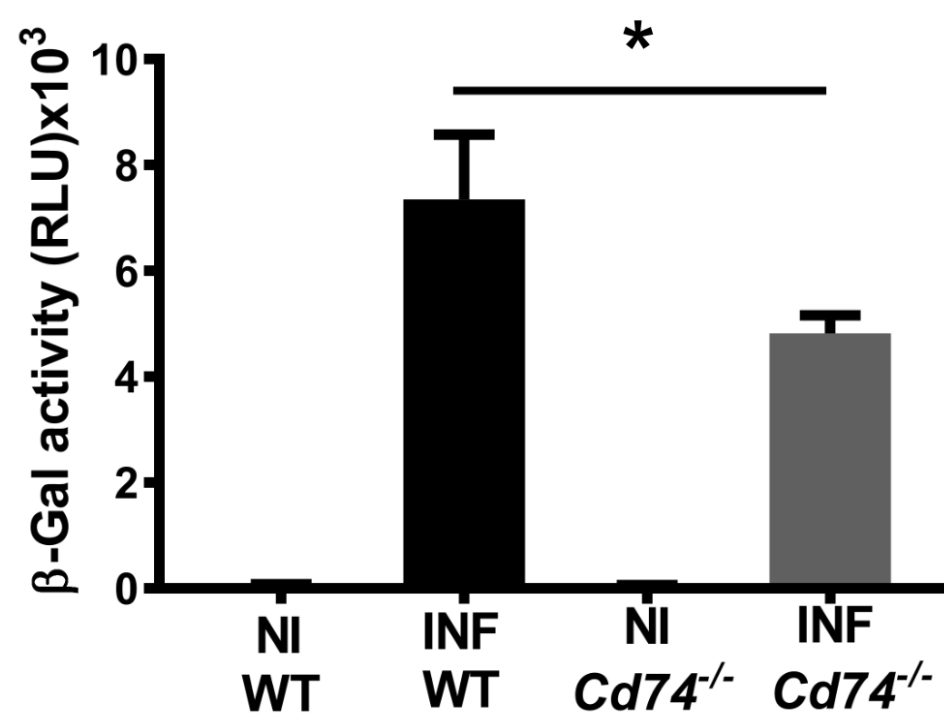

bioRxiv preprint doi: <https://doi.org/10.1101/2021.02.14.430970>; this version posted April 7, 2021. The copyright holder for this preprint (which was not certified by peer review) is the author/funder, who has granted bioRxiv a license to display the preprint in perpetuity. It is made available under aCC-BY 4.0 International license.

C

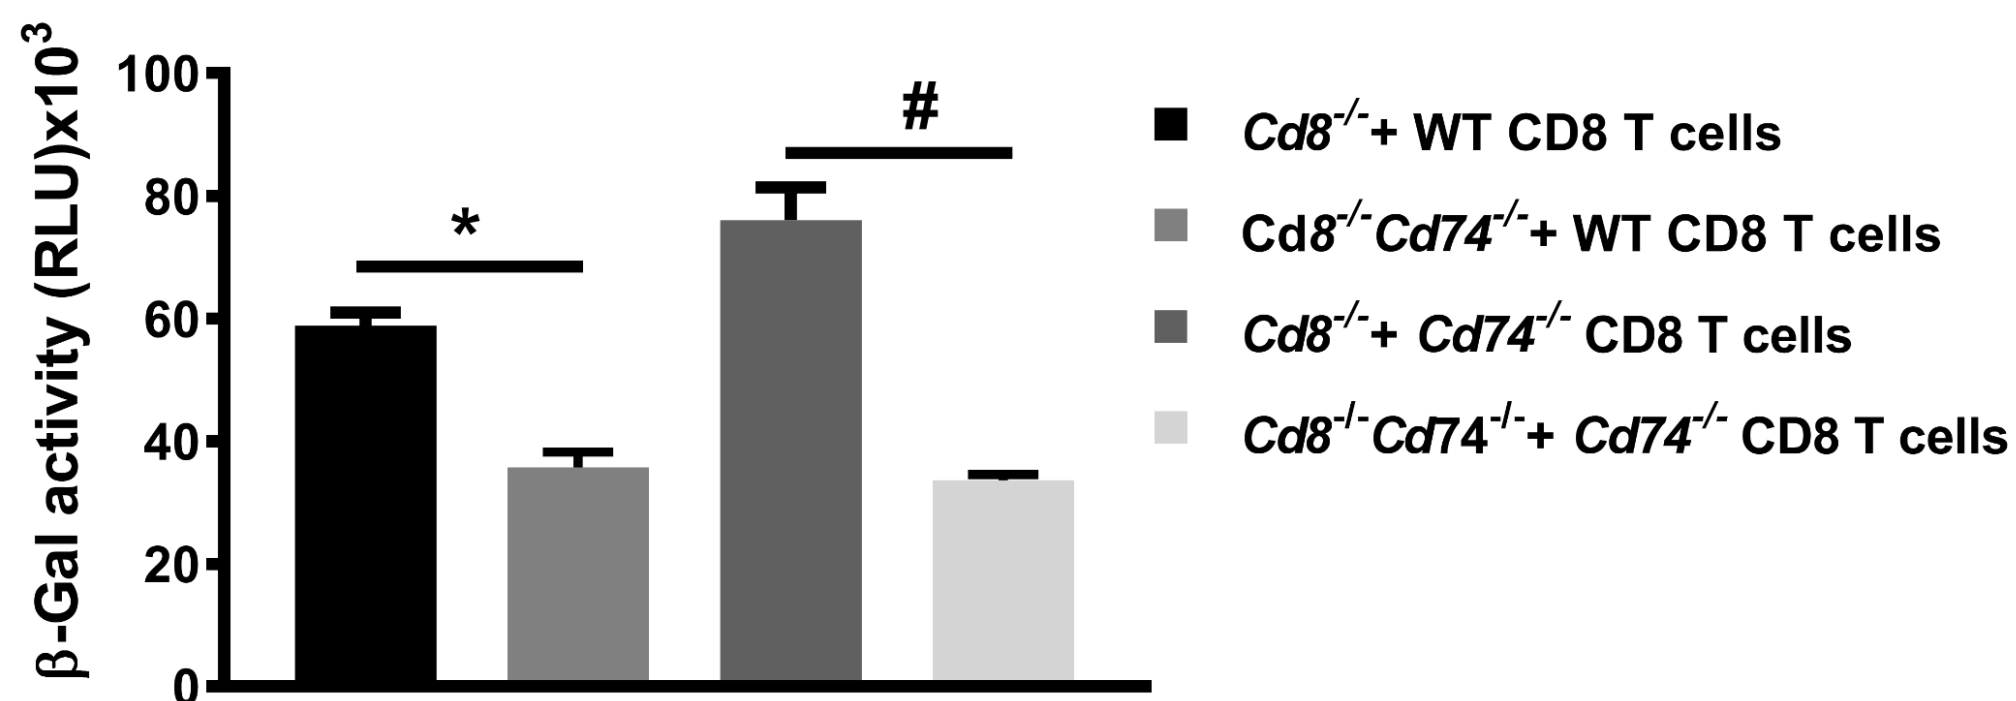



Figure 3

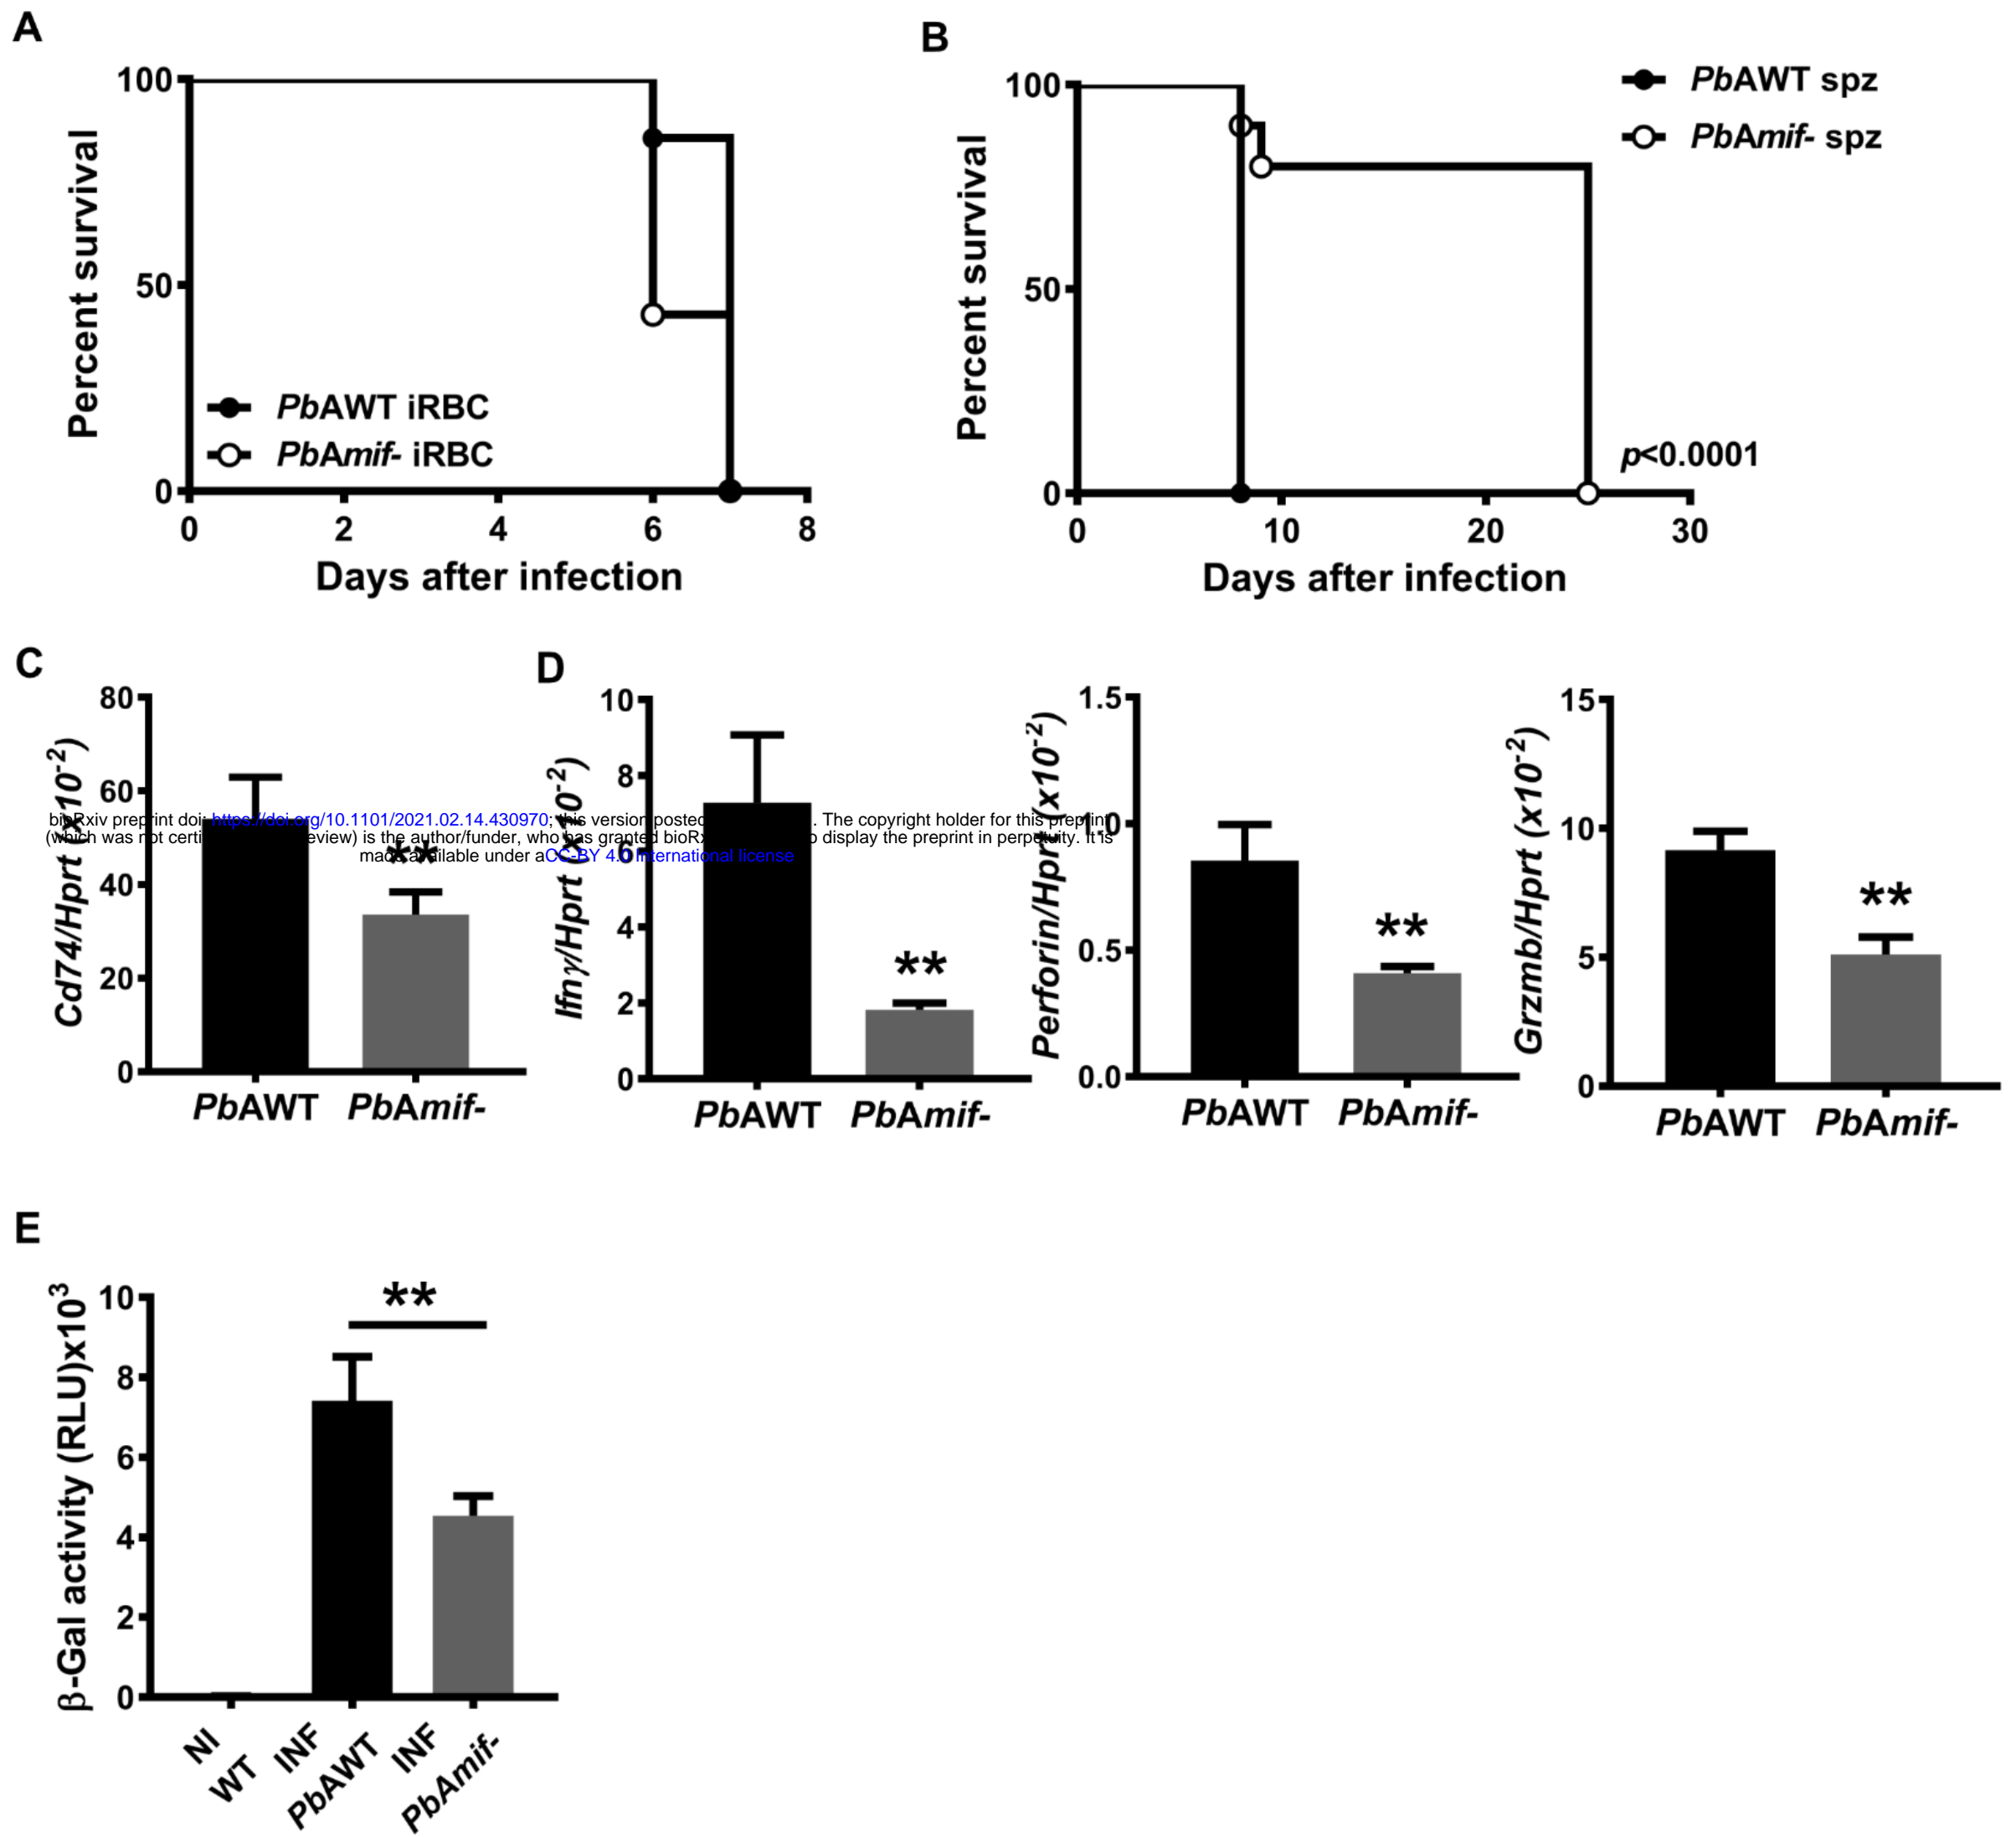

**Figure 4**

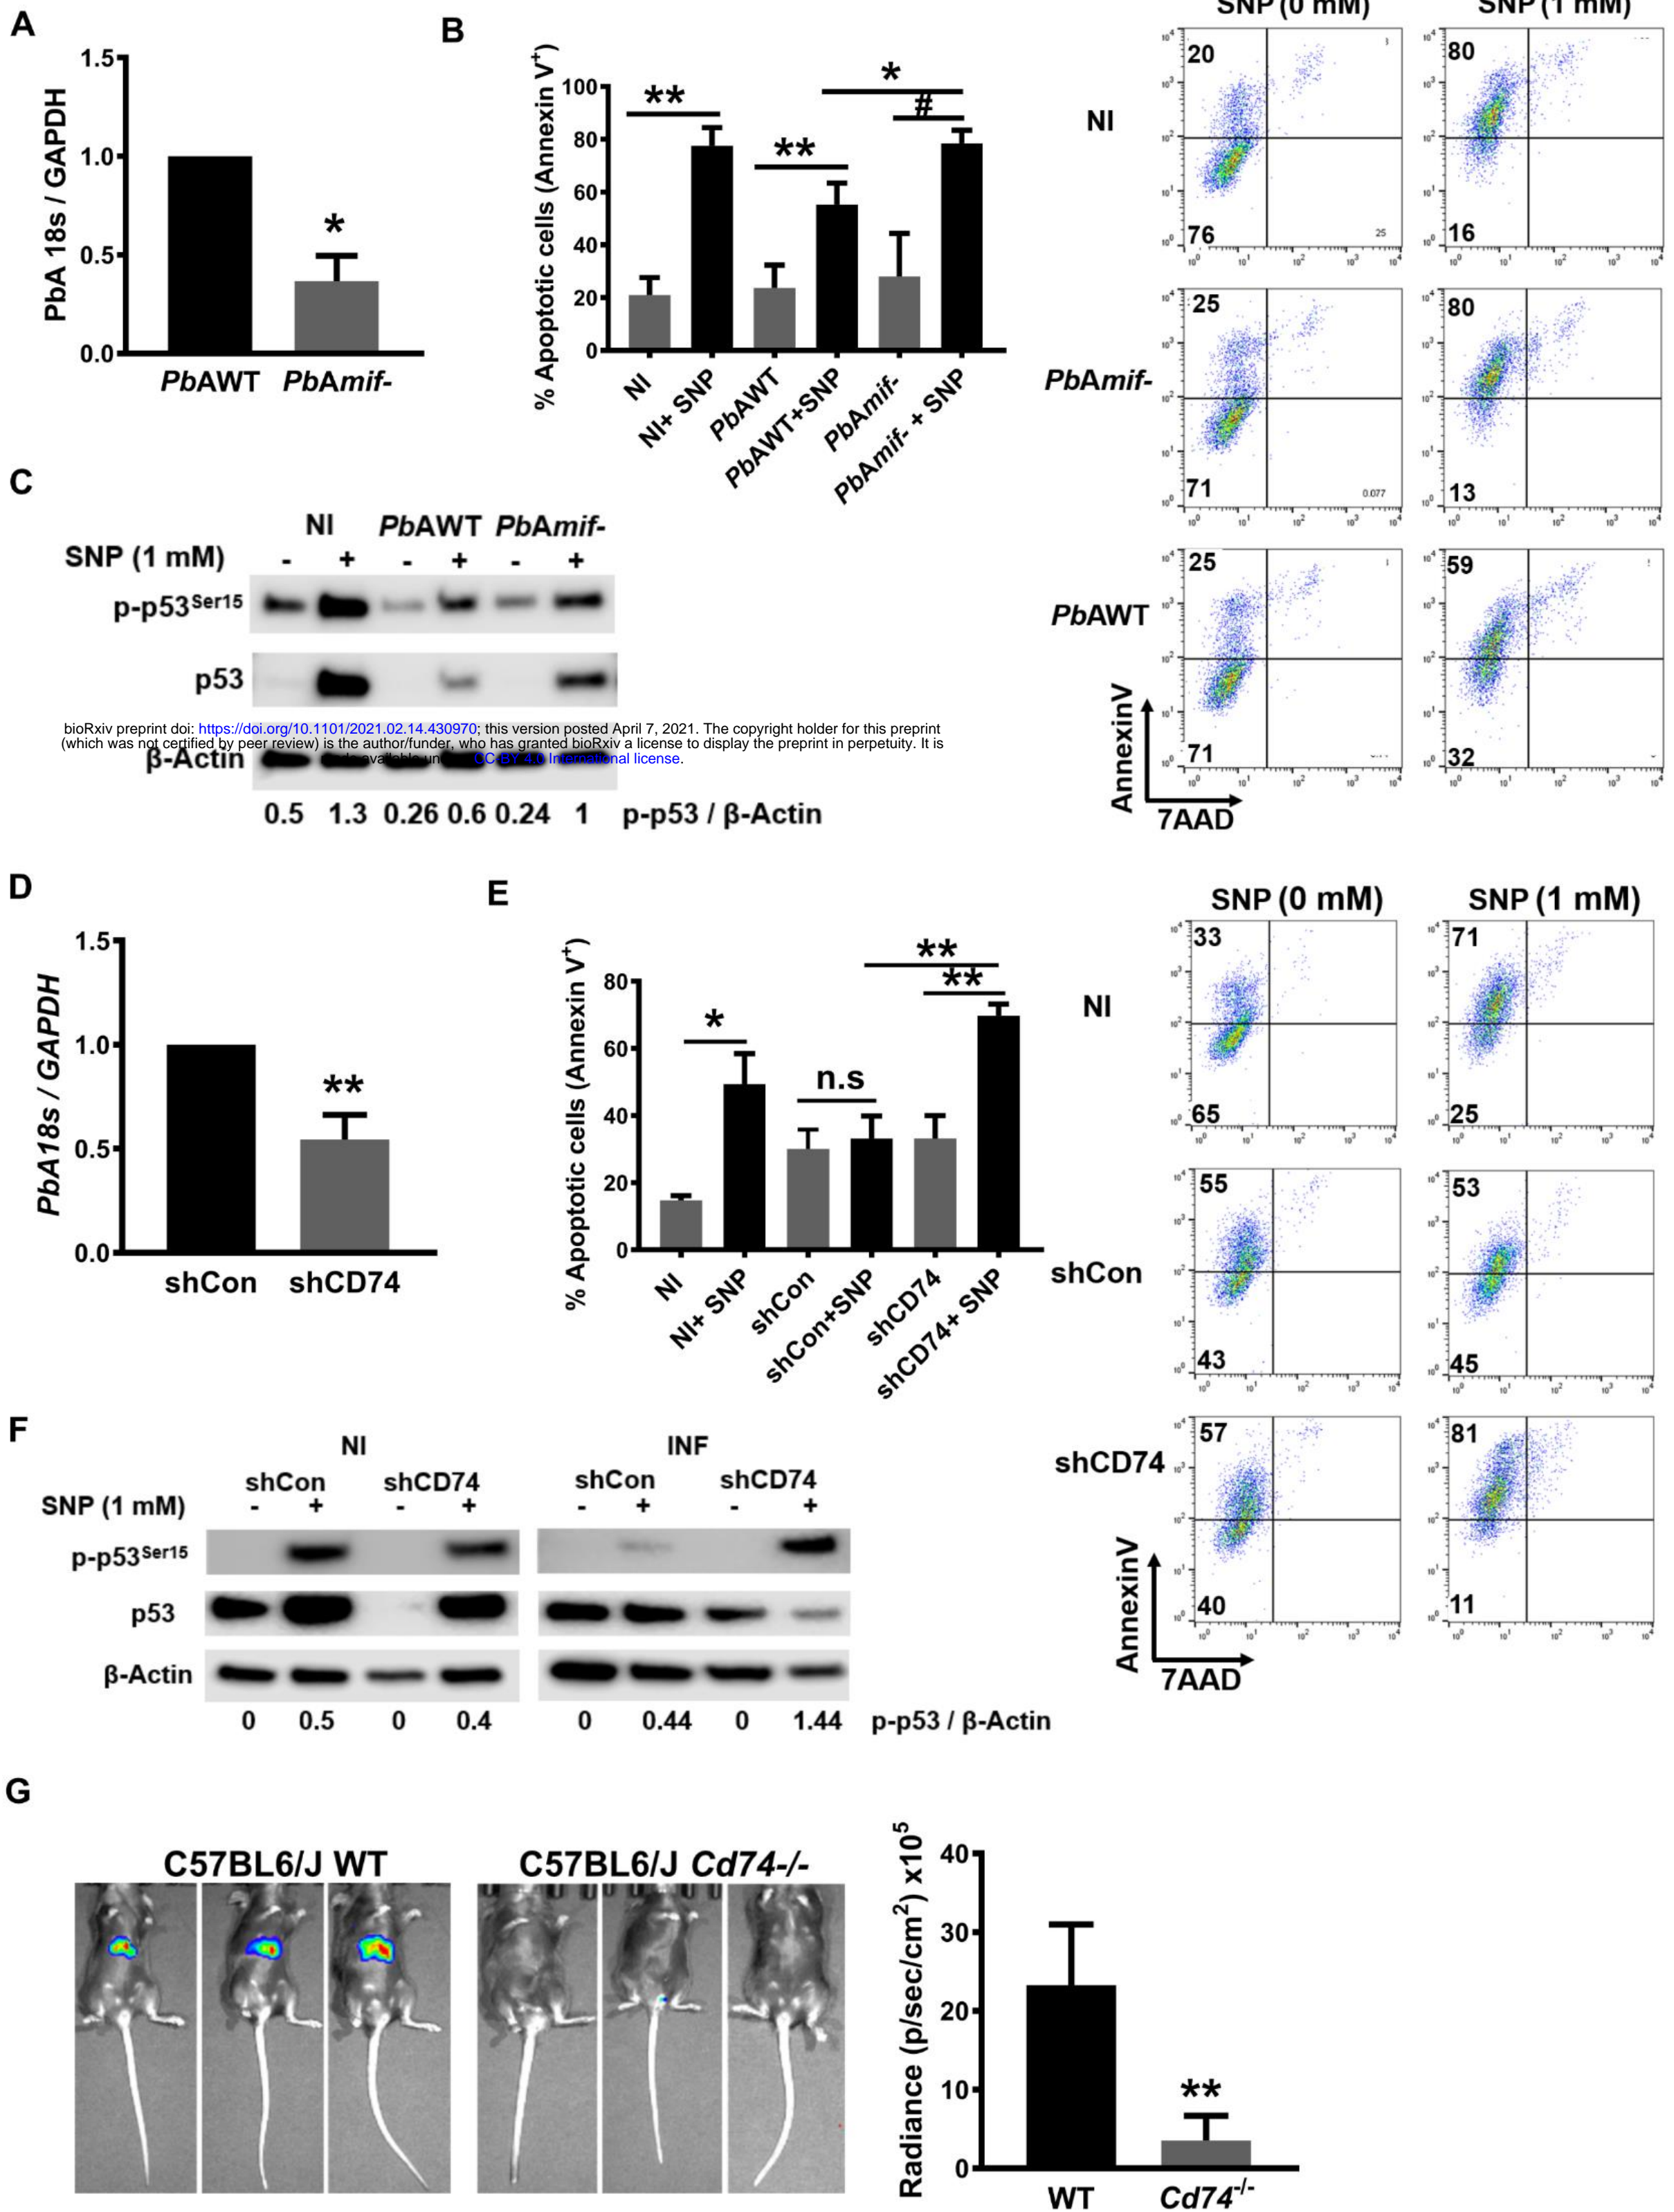

**Figure 5**

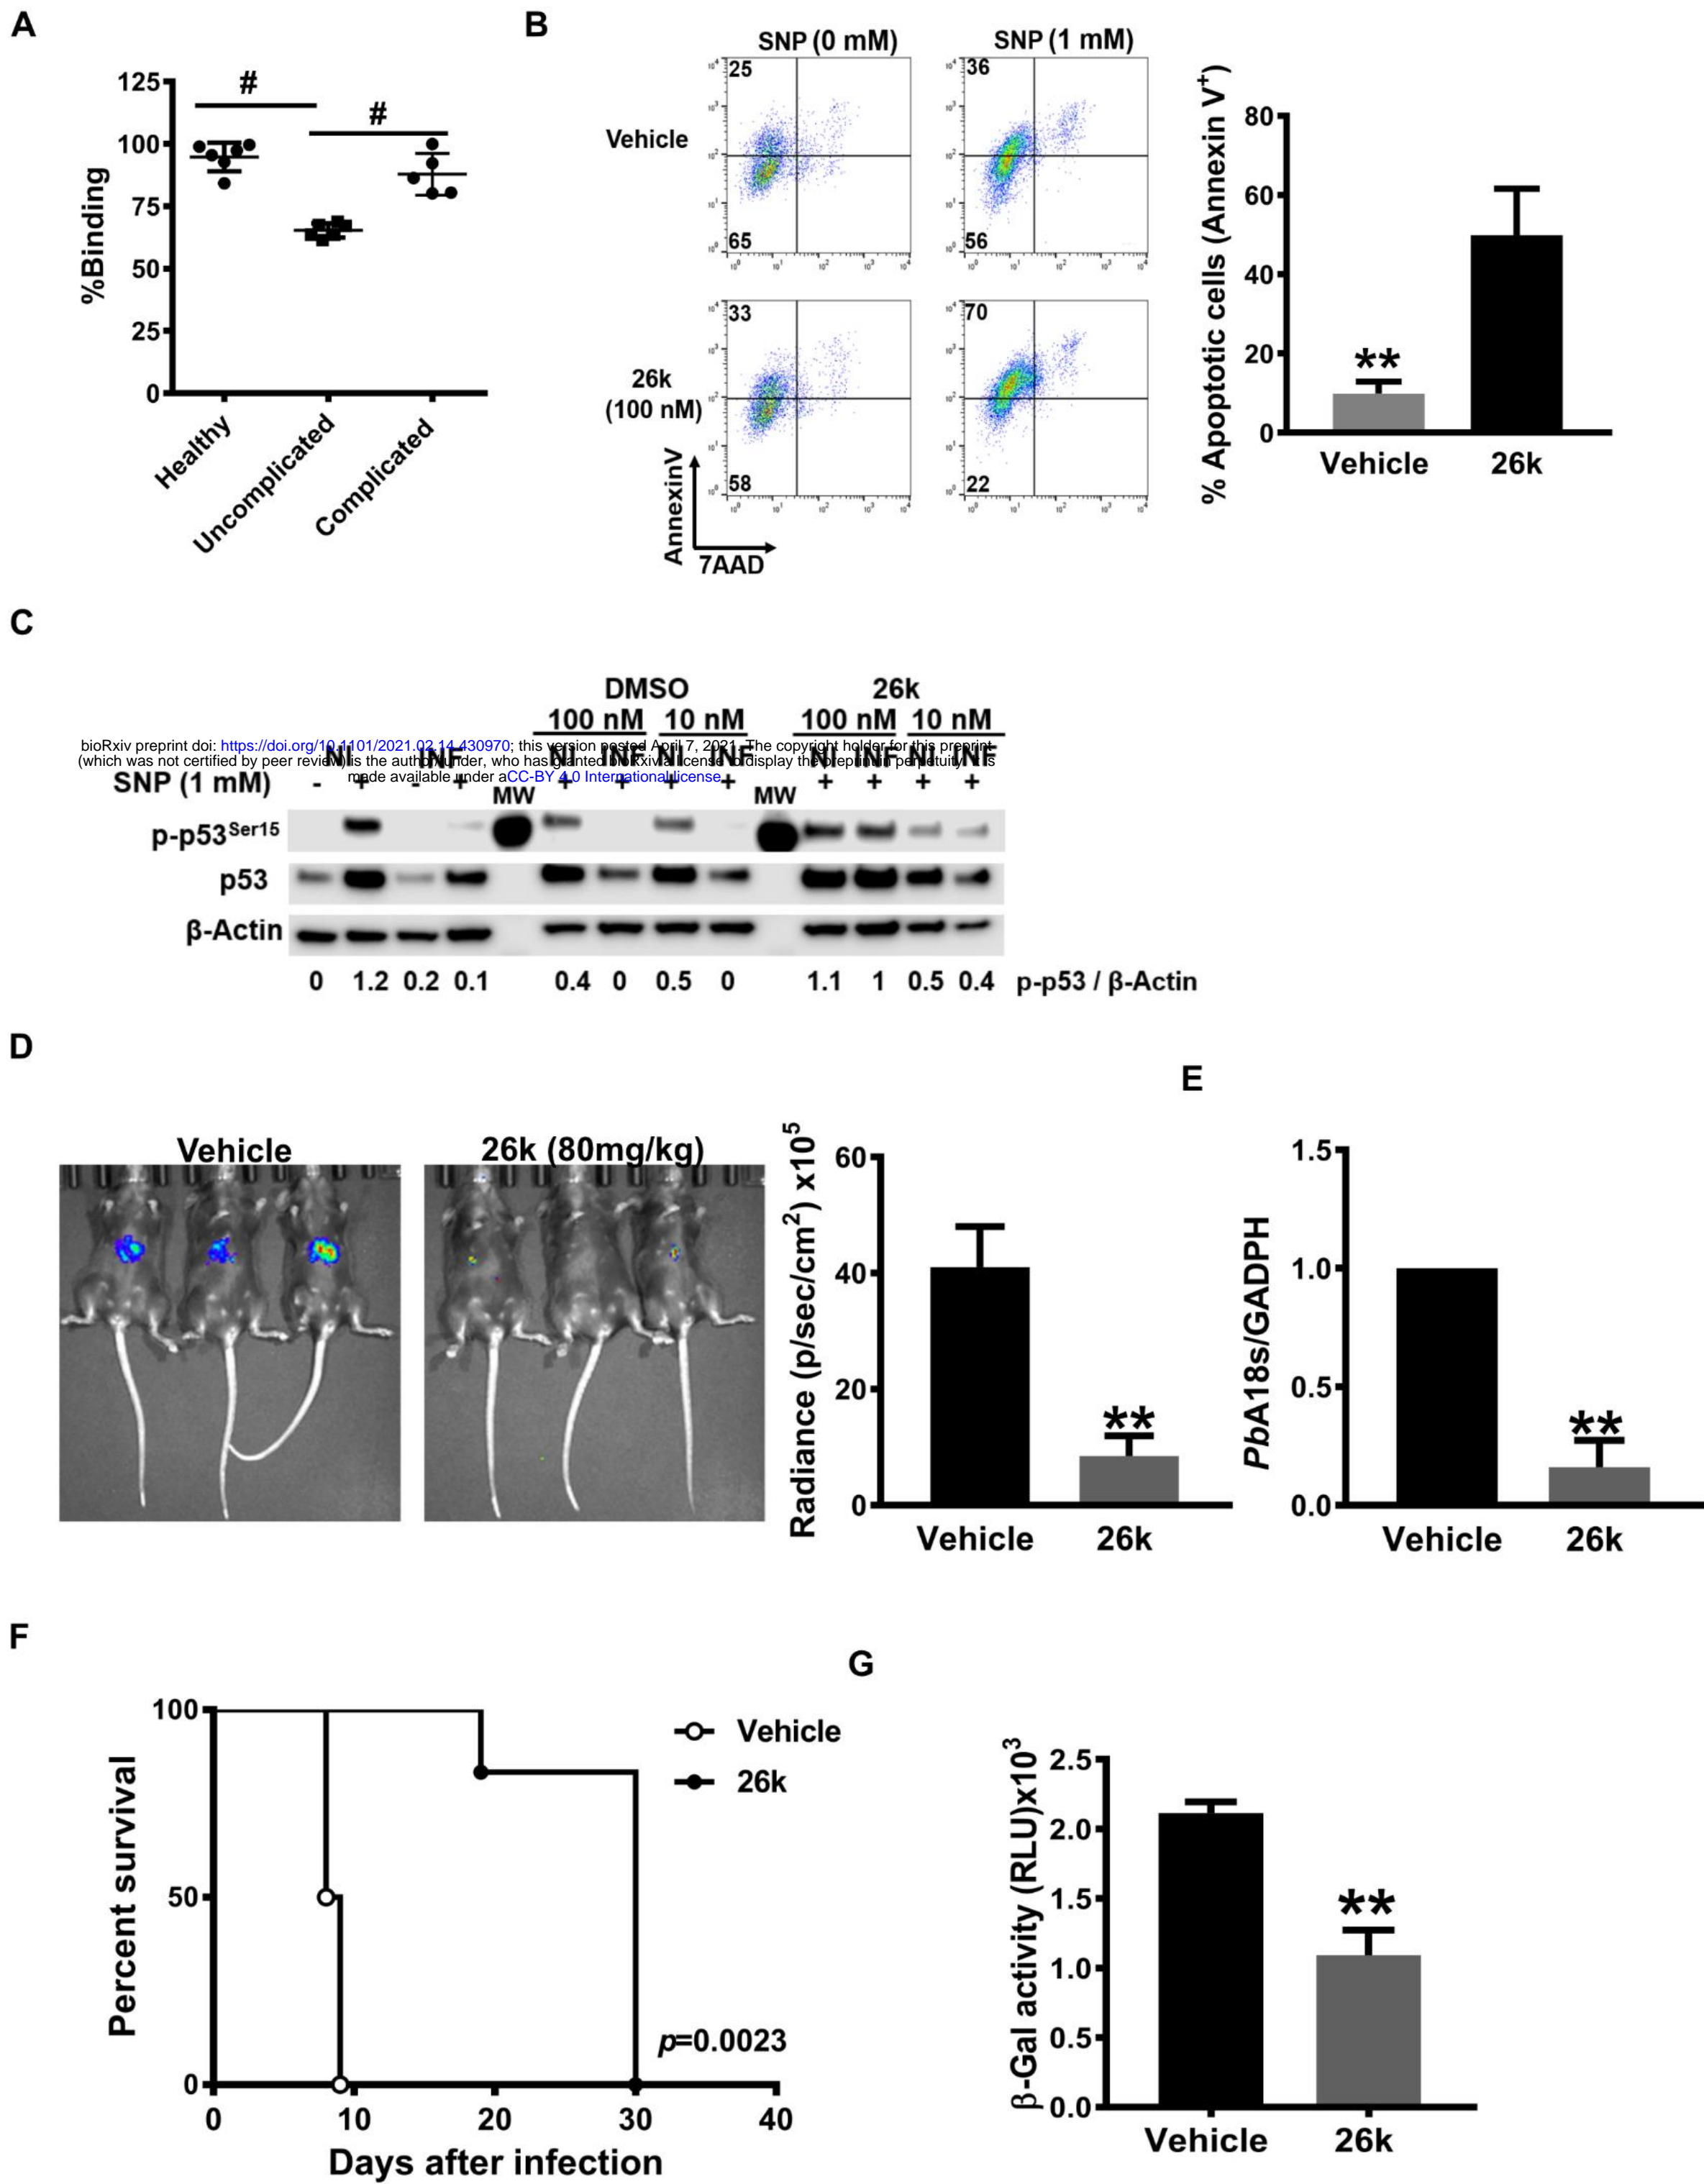

**Figure S1**

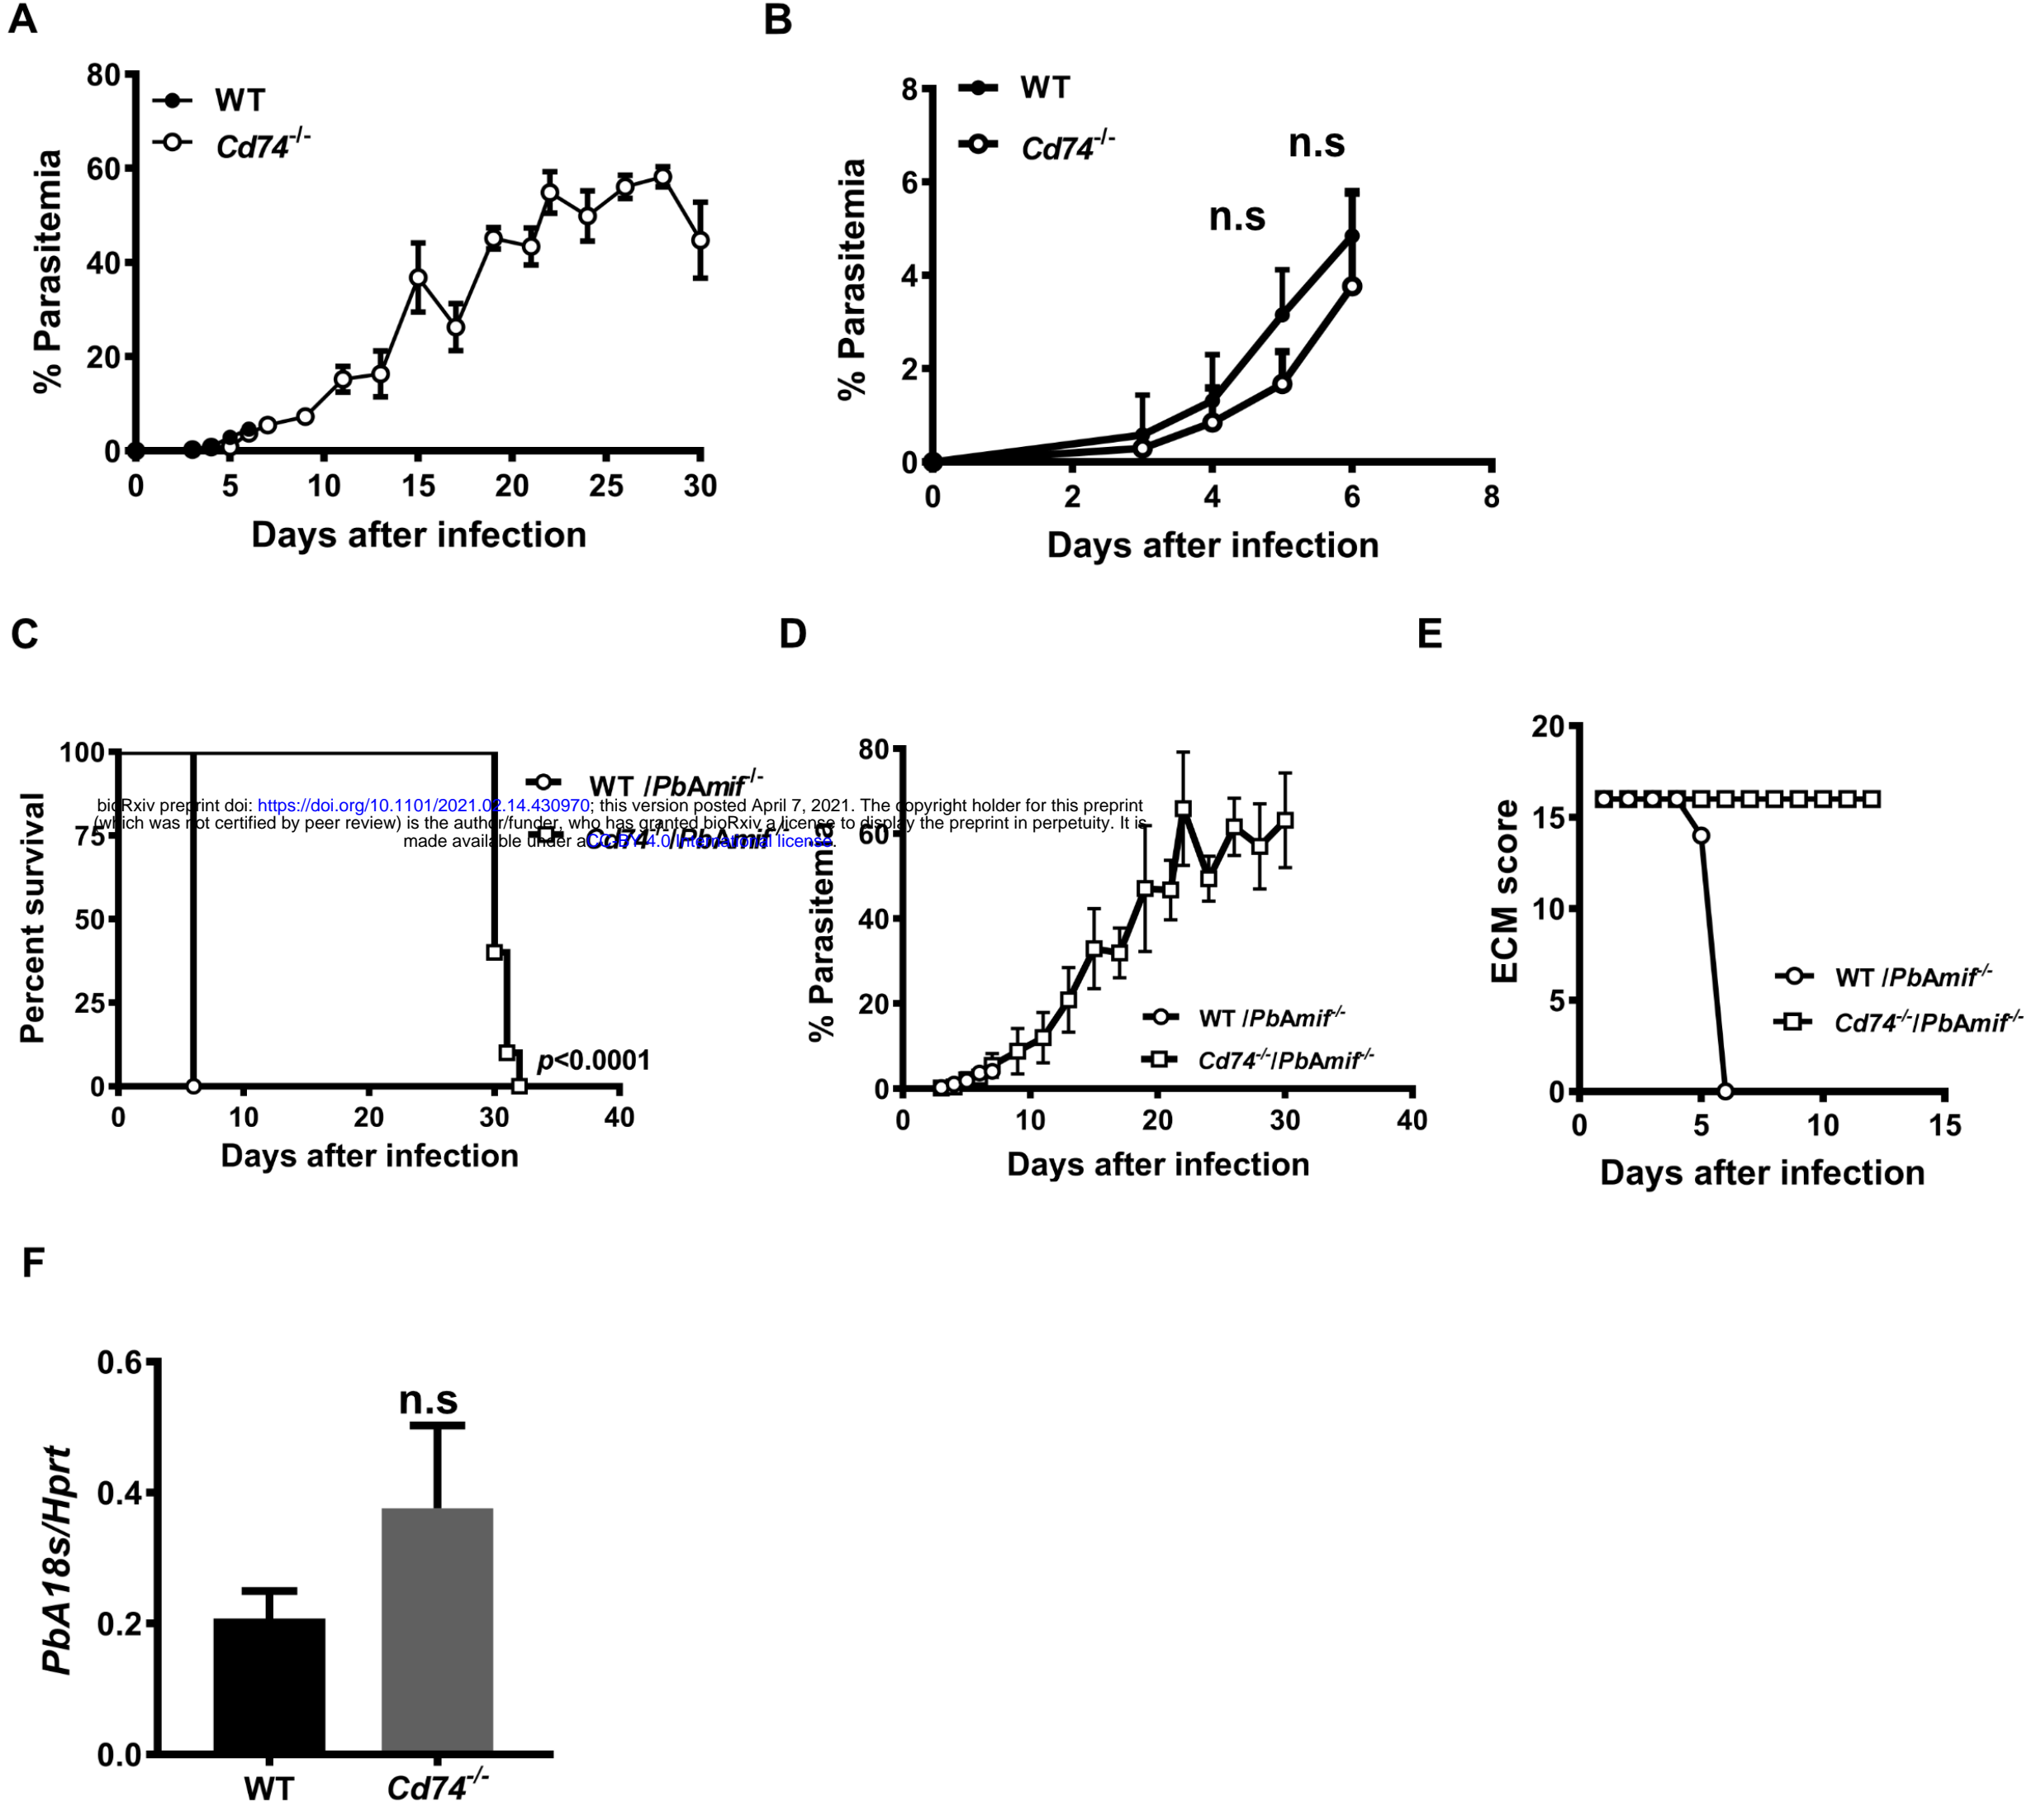

**Figure S2**

**A**

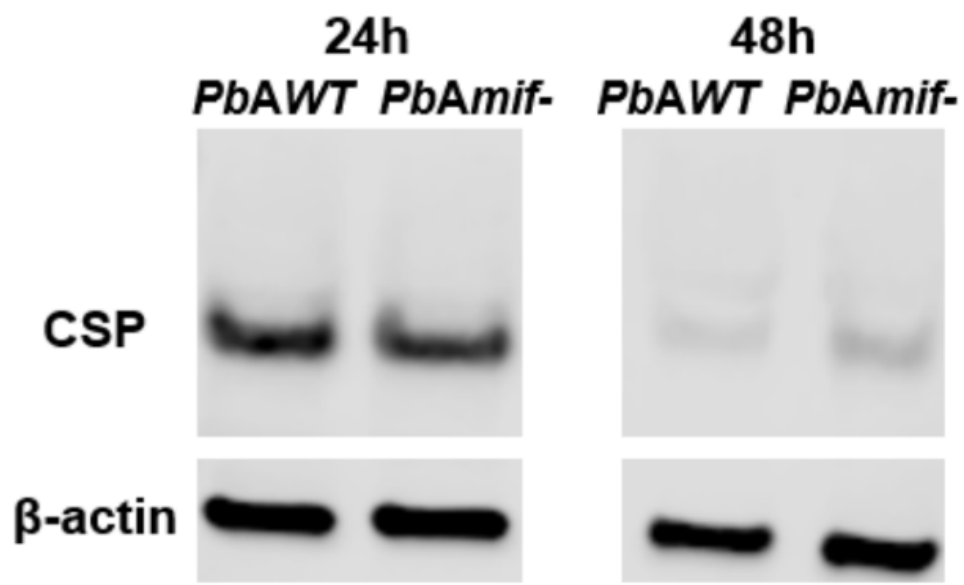

**B**

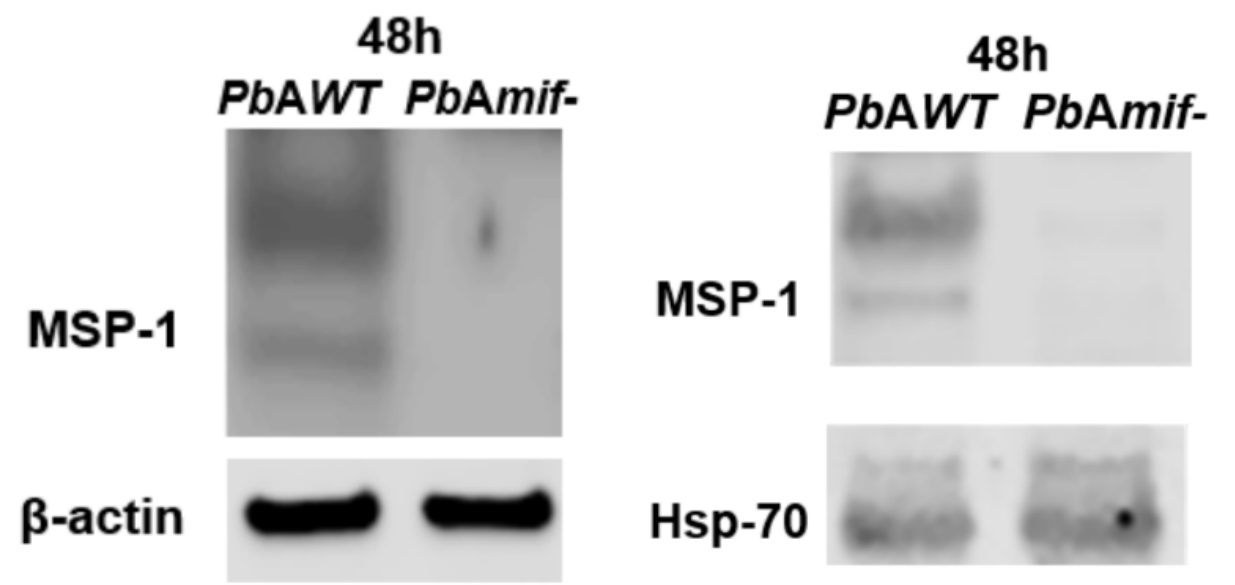

**C**

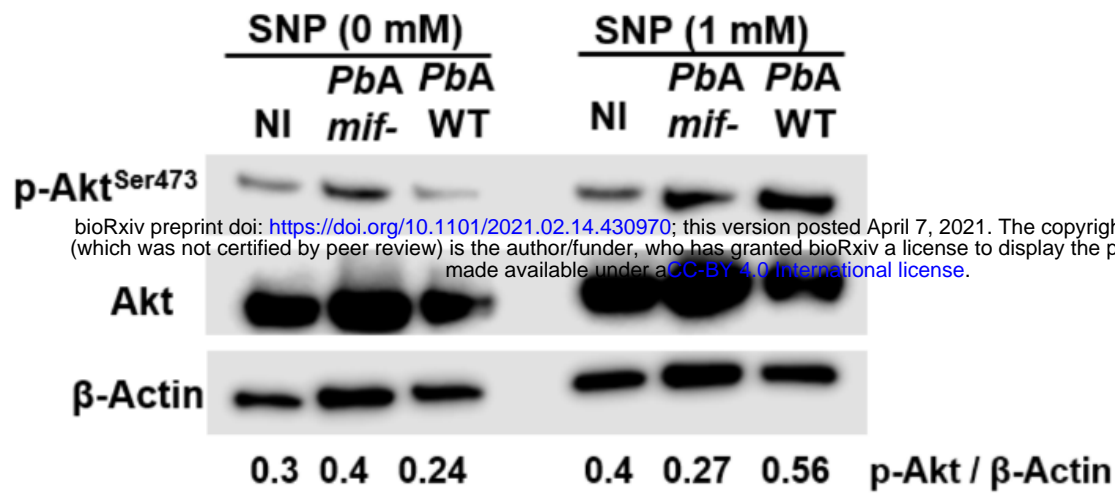

bioRxiv preprint doi: <https://doi.org/10.1101/2021.02.14.430970>; this version posted April 7, 2021. The copyright holder for this preprint (which was not certified by peer review) is the author/funder, who has granted bioRxiv a license to display the preprint in perpetuity. It is made available under aCC-BY 4.0 International license.

**D**

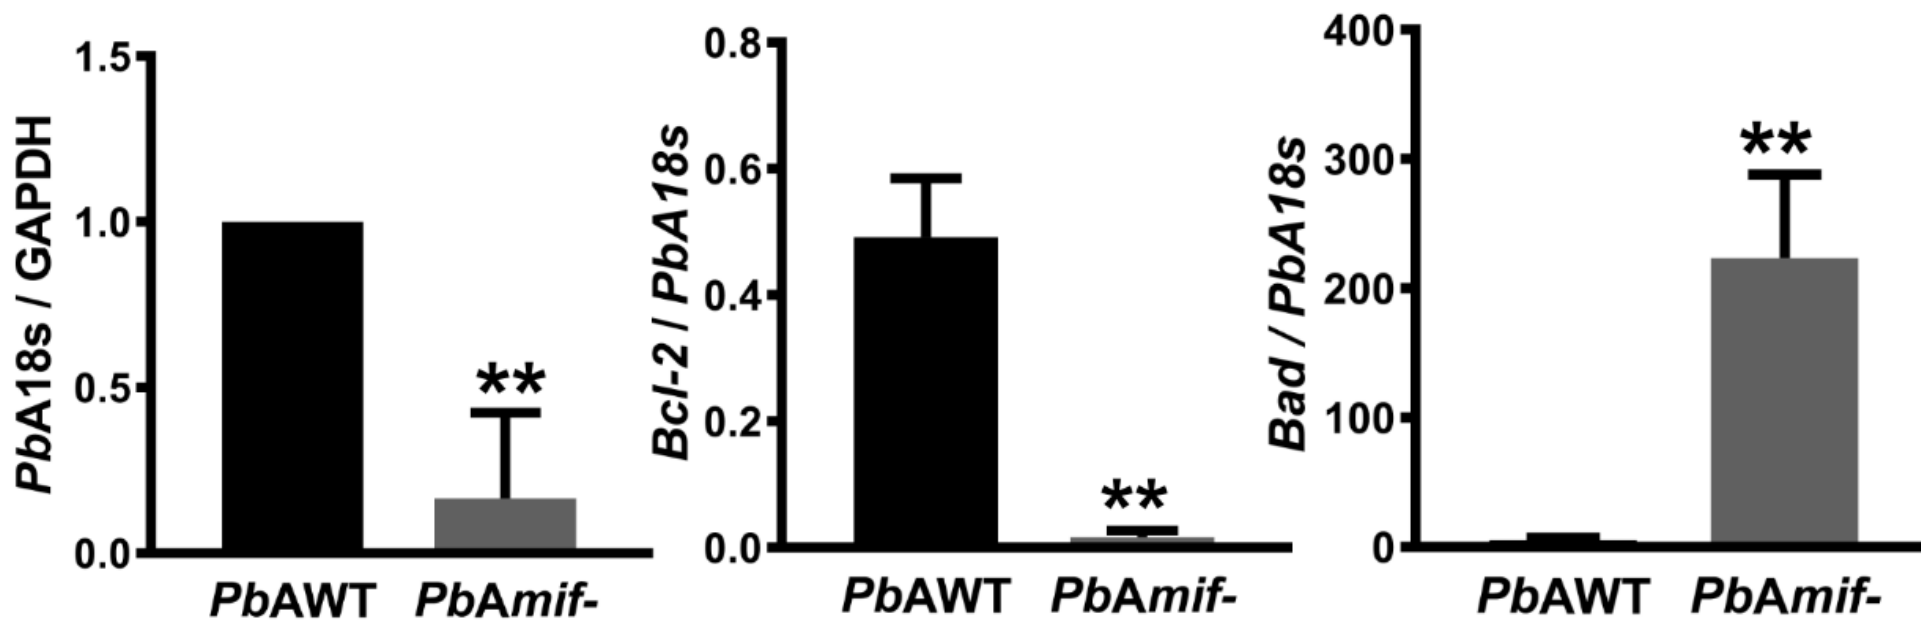

**E**

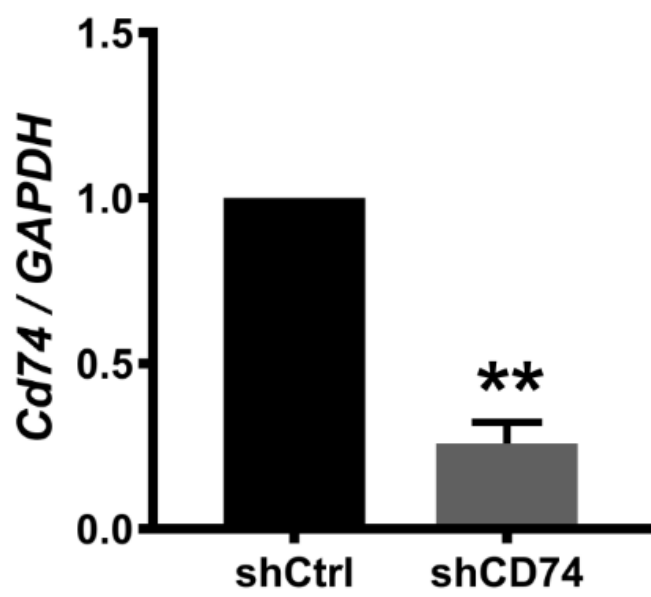

**F**

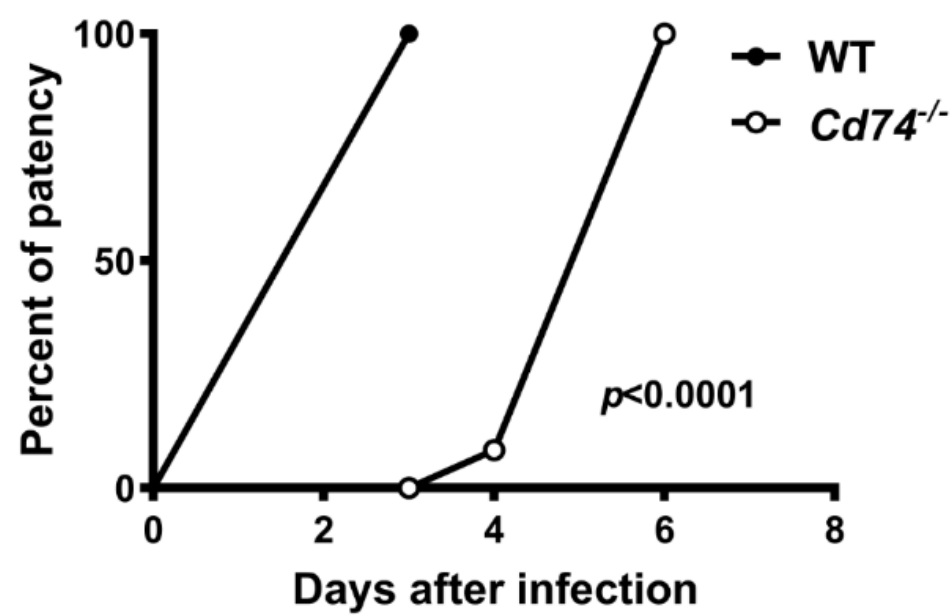

# Figure S3

## A

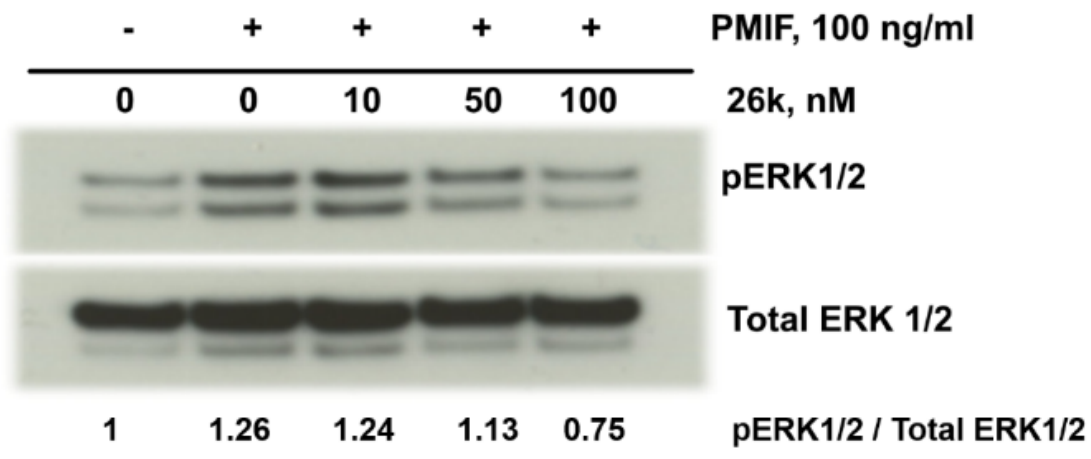

## B

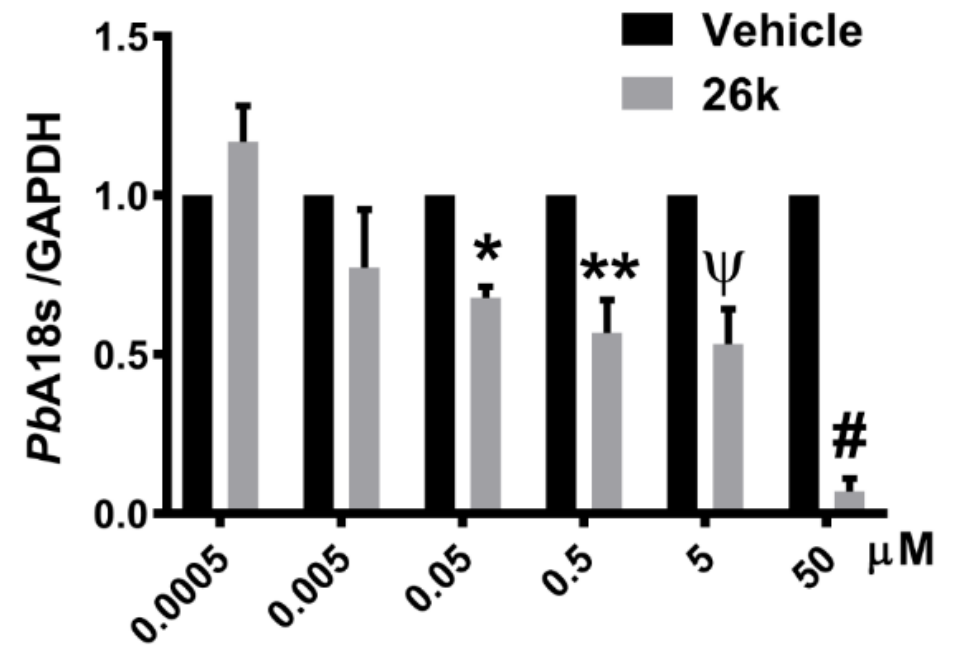

## C

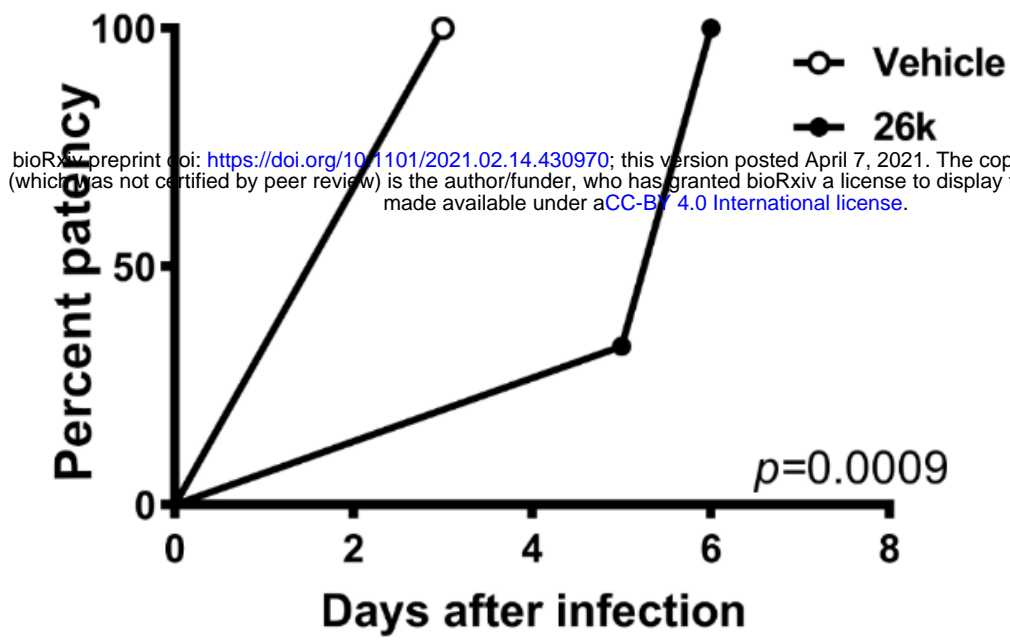

bioRxiv preprint doi: <https://doi.org/10.1101/2021.02.14.430970>; this version posted April 7, 2021. The copyright holder for this preprint (which was not certified by peer review) is the author/funder, who has granted bioRxiv a license to display the preprint in perpetuity. It is made available under aCC-BY 4.0 International license.

## D

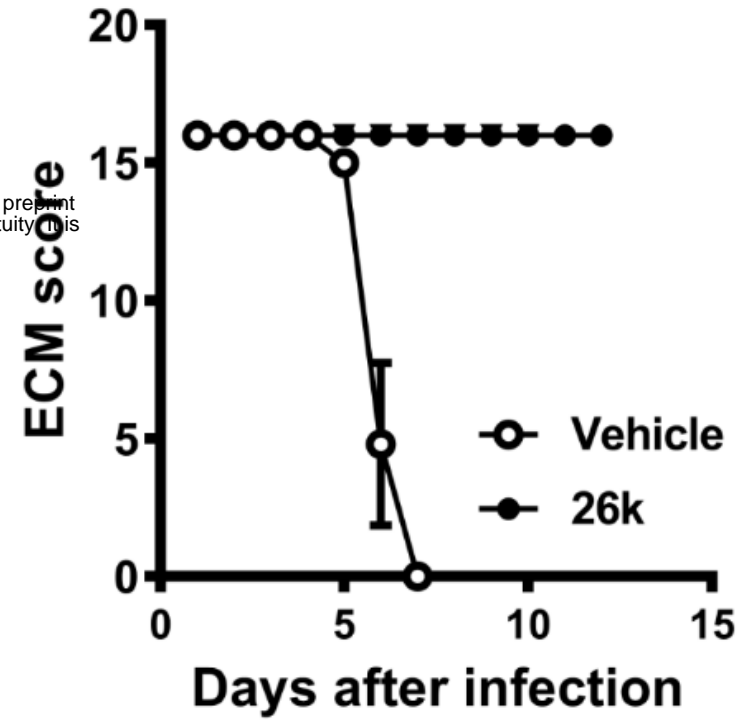

## E

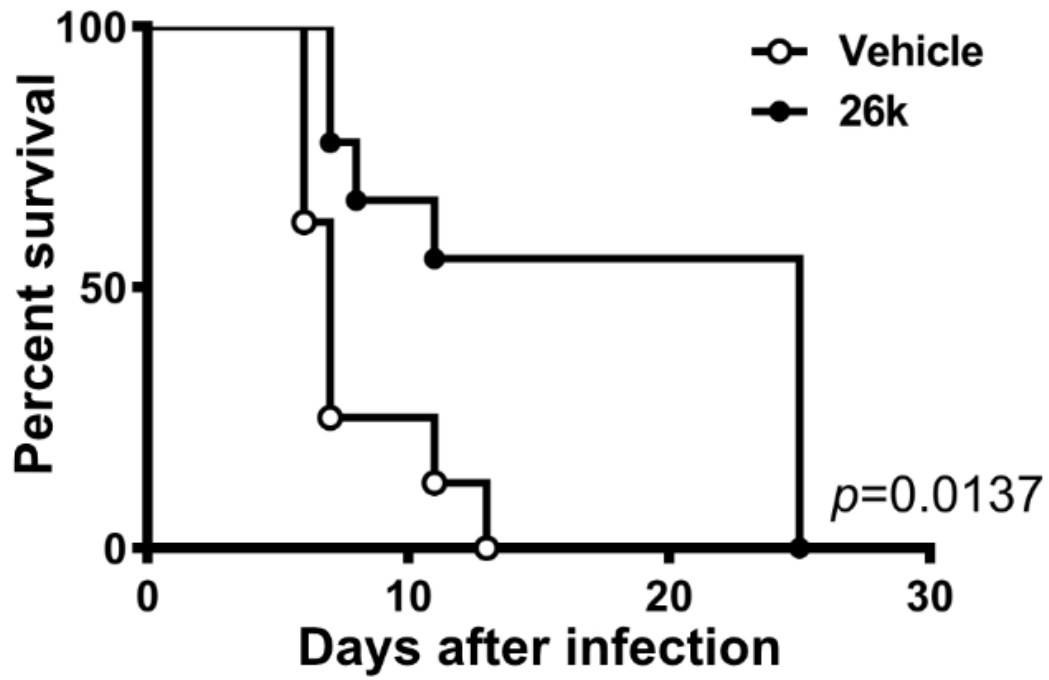

Source: https://www.biorxiv.org/content/10.1101/2021.02.14.430970v2.full.pdf
